# Supplementary material for: Effect of sevoflurane anesthesia on the comprehensive mRNA expression profile of the mouse hippocampus
Source: PubMed Central journal article supplement — Med Gas Res. 2016 Jul 11;6(2):70–6. doi: 10.4103/2045-9912.184715 (PMC5110135; doi:10.4103/2045-9912.184715), 2016-07-11
Supplement: MGR-6-70_Suppl1.pdf [file MGR-6-70_Suppl1.pdf]

Table S1 Changes in the expression levels of genes induced by sevoflurane

| <b>Gene ID</b> | <b>Gene abbreviation</b>                                             | <b>log<sub>2</sub> ratio*</b> |
|----------------|----------------------------------------------------------------------|-------------------------------|
| Rtn4rl2        | Reticulon 4 receptor-like 2                                          | 7.80                          |
| Mas1           | MAS1 oncogene                                                        | 7.76                          |
| Gpx6           | Glutathione peroxidase 6                                             | 7.62                          |
| Ovol2          | Ovo-like 2 (Drosophila)                                              | 7.19                          |
| Calcr          | Calcitonin receptor                                                  | 6.81                          |
| Impg1          | Interphotoreceptor matrix proteoglycan 1                             | 6.72                          |
| Neurod6        | Neurogenic differentiation 6                                         | 6.33                          |
| Neurod2        | Neurogenic differentiation 2                                         | 6.30                          |
| Dio3           | Deiodinase, iodothyronine type III                                   | 5.91                          |
| Cd6            | CD6 antigen                                                          | 5.80                          |
| Gucy2g         | Guanylate cyclase 2g                                                 | 5.75                          |
| Jsrp1          | Junctional sarcoplasmic reticulum protein 1                          | 5.56                          |
| Slc38a4        | Solute carrier family 38, member 4                                   | 5.51                          |
| Tmprss6        | Transmembrane serine protease 6                                      | 5.47                          |
| Sh3rf2         | SH3 domain containing ring finger 2                                  | 5.41                          |
| Ccbp2          | Chemokine binding protein 2                                          | 5.33                          |
| Gprc5a         | G protein-coupled receptor, family C, group 5, member A              | 5.27                          |
| Clspn          | Claspin homolog (Xenopus laevis)                                     | 5.21                          |
| Robo3          | Roundabout homolog 3 (Drosophila)                                    | 5.21                          |
| Figf           | C-fos induced growth factor                                          | 5.20                          |
| Trpc6          | Transient receptor potential cation channel, subfamily C, member 6   | 5.19                          |
| Adora2a        | Adenosine A2a receptor                                               | 5.12                          |
| Tbx15          | T-box 15                                                             | 5.07                          |
| Cdsn           | Corneodesmosin                                                       | 5.02                          |
| Cd4            | CD4 antigen                                                          | 5.02                          |
| Col19a1        | Collagen, type XIX, alpha 1                                          | 4.98                          |
| Kcnh3          | Potassium voltage-gated channel, subfamily H (eag-related), member 3 | 4.94                          |
| Gpr88          | G-protein coupled receptor 88                                        | 4.90                          |

|          |                                                                                                |      |
|----------|------------------------------------------------------------------------------------------------|------|
| C1qtnf7  | C1q and tumor necrosis factor related protein 7                                                | 4.88 |
| Serpina9 | Serine (or cysteine) peptidase inhibitor, clade A (alpha-1 antitrypsin, antitrypsin), member 9 | 4.87 |
| Il20ra   | Interleukin 20 receptor, alpha                                                                 | 4.79 |
| Lrg1     | Leucine-rich alpha-2-glycoprotein 1                                                            | 4.78 |
| Rpe65    | Retinal pigment epithelium 65                                                                  | 4.78 |
| Hs3st2   | Heparan sulfate (glucosamine) 3-O-sulfotransferase 2                                           | 4.74 |
| Cyp2c44  | Cytochrome P450, family 2, subfamily c, polypeptide 44                                         | 4.71 |
| Npc1l1   | NPC1-like 1                                                                                    | 4.71 |
| Spink8   | Serine peptidase inhibitor, Kazal type 8                                                       | 4.70 |
| Prss16   | Protease, serine, 16 (thymus)                                                                  | 4.64 |
| Sim1     | Single-minded homolog 1 (Drosophila)                                                           | 4.64 |
| Sstr4    | Somatostatin receptor 4                                                                        | 4.62 |
| Olf1393  | Olfactory receptor 1393                                                                        | 4.60 |
| Kcnv1    | Potassium channel, subfamily V, member 1                                                       | 4.60 |
| Kcnh4    | Potassium voltage-gated channel, subfamily H (eag-related), member 4                           | 4.57 |
| Ttc22    | Tetratricopeptide repeat domain 22                                                             | 4.55 |
| Olf178   | Olfactory receptor 78                                                                          | 4.55 |
| Mtap4    | Microtubule-associated protein 4                                                               | 4.53 |
| Ly6g6e   | Lymphocyte antigen 6 complex, locus G6E                                                        | 4.47 |
| Egr4     | Early growth response 4                                                                        | 4.46 |
| Asb11    | Ankyrin repeat and SOCS box-containing protein 11                                              | 4.45 |
| Slc17a7  | Solute carrier family 17 (sodium-dependent inorganic phosphate cotransporter), member 7        | 4.41 |
| Gpr6     | G protein-coupled receptor 6                                                                   | 4.40 |
| Wnt2     | Wingless-related MMTV integration site 2                                                       | 4.40 |
| Cabp5    | Calcium binding protein 5                                                                      | 4.39 |
| Pthlh    | Parathyroid hormone-like peptide                                                               | 4.39 |
| Rin1     | Ras and Rab interactor 1                                                                       | 4.38 |
| Tmem16c  | Transmembrane protein 16C                                                                      | 4.37 |

|          |                                                                                                |      |
|----------|------------------------------------------------------------------------------------------------|------|
| Chrna6   | Cholinergic receptor, nicotinic, alpha polypeptide 6                                           | 4.34 |
| Insl6    | Insulin-like 6                                                                                 | 4.33 |
| Rprml    | Reprimo-like                                                                                   | 4.32 |
| Hpse     | Heparanase                                                                                     | 4.32 |
| Bcl11b   | B-cell leukemia/lymphoma 11B                                                                   | 4.31 |
| Igsf9    | Immunoglobulin superfamily, member 9                                                           | 4.29 |
| Nr4a2    | Nuclear receptor subfamily 4, group A, member 2                                                | 4.29 |
| Lpl      | Lipoprotein lipase                                                                             | 4.27 |
| Nrgn     | Neurogranin                                                                                    | 4.26 |
| Klf14    | Kruppel-like factor 14                                                                         | 4.26 |
| Igfbp1b  | Immunoglobulin (CD79A) binding protein 1b                                                      | 4.25 |
| Vsig2    | V-set and immunoglobulin domain containing 2                                                   | 4.25 |
| Hoxa5    | Homeo box A5                                                                                   | 4.23 |
| Tac1     | Tachykinin 1                                                                                   | 4.22 |
| Agtr1a   | Angiotensin II receptor, type 1a                                                               | 4.21 |
| Chrm1    | Cholinergic receptor, muscarinic 1, CNS                                                        | 4.20 |
| Rgs9     | Regulator of G-protein signaling 9                                                             | 4.19 |
| Rxrg     | Retinoid X receptor gamma                                                                      | 4.19 |
| Nxph2    | Neurexophilin 2                                                                                | 4.17 |
| Icam5    | Intercellular adhesion molecule 5, telencephalin                                               | 4.17 |
| Golt1a   | Golgi transport 1 homolog A ( <i>S. cerevisiae</i> )                                           | 4.17 |
| Tmem40   | Transmembrane protein 40                                                                       | 4.17 |
| Lct      | Lactase                                                                                        | 4.16 |
| Ddn      | Dendrin                                                                                        | 4.16 |
| Pkp1     | Plakophilin 1                                                                                  | 4.15 |
| Slc6a5   | Solute carrier family 6 (neurotransmitter transporter, glycine), member 5                      | 4.15 |
| Serpinb8 | Serine (or cysteine) peptidase inhibitor, clade B, member 8                                    | 4.12 |
| Lipg     | Lipase, endothelial                                                                            | 4.11 |
| Adamts13 | A disintegrin-like and metallopeptidase (reprolysin type) with thrombospondin type 1 motif, 13 | 4.09 |

|         |                                                                                         |      |
|---------|-----------------------------------------------------------------------------------------|------|
| Gm587   | Gene model 587, (NCBI)                                                                  | 4.09 |
| Hpx     | Hemopexin                                                                               | 4.06 |
| Crh     | Corticotropin releasing hormone                                                         | 4.04 |
| Alx4    | Aristaless 4                                                                            | 4.04 |
| Slc17a8 | Solute carrier family 17 (sodium-dependent inorganic phosphate cotransporter), member 8 | 4.03 |
| Chrm5   | Cholinergic receptor, muscarinic 5                                                      | 4.03 |
| Indo    | Indoleamine-pyrrole 2,3 dioxygenase                                                     | 4.00 |
| Cyp19a1 | Cytochrome P450, family 19, subfamily a, polypeptide 1                                  | 3.99 |
| Krt9    | Keratin 9                                                                               | 3.98 |
| Cd7     | CD7 antigen                                                                             | 3.98 |
| Gm1337  | Gene model 1337, (NCBI)                                                                 | 3.95 |
| Egr2    | Early growth response 2                                                                 | 3.92 |
| Scn4b   | Sodium channel, type IV, beta                                                           | 3.91 |
| Dkk2    | Dickkopf homolog 2 ( <i>Xenopus laevis</i> )                                            | 3.90 |
| Pcdhb1  | Protocadherin beta 1                                                                    | 3.90 |
| Wfikkn1 | WAP, FS, Ig, KU, and NTR-containing protein 1                                           | 3.89 |
| Egr1    | Early growth response 1                                                                 | 3.89 |
| Acr     | Preproacrosin                                                                           | 3.88 |
| Htr3a   | 5-hydroxytryptamine (serotonin) receptor 3A                                             | 3.88 |
| Pcsk9   | Proprotein convertase subtilisin/kexin type 9                                           | 3.88 |
| Prdm1   | PR domain containing 1, with ZNF domain                                                 | 3.88 |
| Ptgs2   | Prostaglandin-endoperoxide synthase 2                                                   | 3.87 |
| Igfbp6  | Insulin-like growth factor binding protein 6                                            | 3.87 |
| Epyc    | Epiphycan                                                                               | 3.87 |
| Il1f5   | Interleukin 1 family, member 5 (delta)                                                  | 3.87 |
| Tpbp    | Trophoblast glycoprotein                                                                | 3.82 |
| Tmem16b | Transmembrane protein 16B                                                               | 3.80 |
| Tgm3    | Transglutaminase 3, E polypeptide                                                       | 3.79 |
| Prss22  | Protease, serine, 22                                                                    | 3.79 |

|          |                                                                             |      |
|----------|-----------------------------------------------------------------------------|------|
| Drd1a    | Dopamine receptor D1A                                                       | 3.78 |
| Insrr    | Insulin receptor-related receptor                                           | 3.76 |
| Hpca     | Hippocalcin                                                                 | 3.76 |
| Trim14   | Tripartite motif-containing 14                                              | 3.76 |
| Htr2a    | 5-hydroxytryptamine (serotonin) receptor 2A                                 | 3.74 |
| Abi3bp   | ABI gene family, member 3 (NESH) binding protein                            | 3.73 |
| Grasp    | GRP1 (general receptor for phosphoinositides 1)-associated scaffold protein | 3.70 |
| Zbtb32   | Zinc finger and BTB domain containing 32                                    | 3.67 |
| Penk1    | Preproenkephalin 1                                                          | 3.67 |
| Pptrh    | Protein tyrosine phosphatase, receptor type, H                              | 3.65 |
| Arhgap15 | Rho GTPase activating protein 15                                            | 3.62 |
| AW536275 | Expressed sequence AW536275                                                 | 3.61 |
| Cacna1e  | Calcium channel, voltage-dependent, R type, alpha 1E subunit                | 3.61 |
| Ras10a   | RAS-like, family 10, member A                                               | 3.61 |
| Mup5     | Major urinary protein 5                                                     | 3.60 |
| Alox12b  | Arachidonate 12-lipoxygenase, 12R type                                      | 3.59 |
| Actn2    | Actinin alpha 2                                                             | 3.58 |
| Igfbp4   | Insulin-like growth factor binding protein 4                                | 3.58 |
| Zdhhc23  | Zinc finger, DHHC domain containing 23                                      | 3.55 |
| H60      | Histocompatibility 60                                                       | 3.54 |
| Krt73    | Keratin 73                                                                  | 3.54 |
| Espnl    | Espin-like                                                                  | 3.54 |
| Ccdc129  | Coiled-coil domain containing 129                                           | 3.53 |
| Cyp4b1   | Cytochrome P450, family 4, subfamily b, polypeptide 1                       | 3.52 |
| Fgf23    | Fibroblast growth factor 23                                                 | 3.52 |
| Tmprss4  | Transmembrane protease, serine 4                                            | 3.51 |
| Acmsd    | Amino carboxymuconate semialdehyde decarboxylase                            | 3.51 |
| Fosb     | FBJ osteosarcoma oncogene B                                                 | 3.50 |
| Dusp2    | Dual specificity phosphatase 2                                              | 3.49 |

|          |                                                                                                                                 |      |
|----------|---------------------------------------------------------------------------------------------------------------------------------|------|
| Glp2r    | Glucagon-like peptide 2 receptor                                                                                                | 3.49 |
| Mesp2    | Mesoderm posterior 2                                                                                                            | 3.49 |
| Homer1   | Homer homolog 1 (Drosophila)                                                                                                    | 3.47 |
| Nov      | Nephroblastoma overexpressed gene                                                                                               | 3.46 |
| Htr1f    | 5-hydroxytryptamine (serotonin) receptor 1F                                                                                     | 3.43 |
| Mei1     | Meiosis defective 1                                                                                                             | 3.43 |
| Kcnip2   | Kv channel-interacting protein 2                                                                                                | 3.43 |
| Gpr81    | G protein-coupled receptor 81                                                                                                   | 3.43 |
| Sgcd     | Sarcoglycan, delta (dystrophin-associated glycoprotein)                                                                         | 3.43 |
| Drd2     | Dopamine receptor 2                                                                                                             | 3.41 |
| Pnpla1   | Patatin-like phospholipase domain containing 1                                                                                  | 3.41 |
| Corin    | Corin                                                                                                                           | 3.41 |
| C1qtnf9  | C1q and tumor necrosis factor related protein 9                                                                                 | 3.41 |
| Chrdl1   | Chordin-like 1                                                                                                                  | 3.40 |
| Cyr61    | Cysteine rich protein 61                                                                                                        | 3.38 |
| Tbr1     | T-box brain gene 1                                                                                                              | 3.38 |
| Prdm8    | PR domain containing 8                                                                                                          | 3.37 |
| Pcdh12   | Protocadherin 12                                                                                                                | 3.36 |
| Krt12    | Keratin 12                                                                                                                      | 3.33 |
| Vipr1    | Vasoactive intestinal peptide receptor 1                                                                                        | 3.32 |
| Phex     | Phosphate regulating gene with homologies to endopeptidases on the X chromosome (hypophosphatemia, vitamin D resistant rickets) | 3.32 |
| Lrrc26   | Leucine rich repeat containing 26                                                                                               | 3.32 |
| Htra4    | HtrA serine peptidase 4                                                                                                         | 3.32 |
| Neto1    | Neuropilin (NRP) and tolloid (TLL)-like 1                                                                                       | 3.29 |
| Nlrp6    | NLR family, pyrin domain containing 6                                                                                           | 3.29 |
| Caln1    | Calneuron 1                                                                                                                     | 3.26 |
|          | Transcribed locus, weakly similar to XP_001088224.1 hypothetical protein, partial [Macaca mulatta]                              | 3.26 |
| Olfir316 | Olfactory receptor 316                                                                                                          | 3.25 |

|          |                                                                             |      |
|----------|-----------------------------------------------------------------------------|------|
| Tmprss9  | Transmembrane protease, serine 9                                            | 3.25 |
| Kcng3    | Potassium voltage-gated channel, subfamily G, member 3                      | 3.25 |
| Tph2     | Tryptophan hydroxylase 2                                                    | 3.25 |
| Duox1    | Dual oxidase 1                                                              | 3.25 |
| Scn11a   | Sodium channel, voltage-gated, type XI, alpha                               | 3.25 |
| Smpd3    | Sphingomyelin phosphodiesterase 3, neutral                                  | 3.20 |
| Stk32a   | Serine/threonine kinase 32A                                                 | 3.20 |
| Gcnt2    | Glucosaminyl (N-acetyl) transferase 2, I-branching enzyme                   | 3.20 |
| Maff     | V-maf musculoaponeurotic fibrosarcoma oncogene family, protein F<br>(avian) | 3.20 |
| Gng7     | Guanine nucleotide binding protein (G protein), gamma 7 subunit             | 3.20 |
| Pnmt     | Phenylethanolamine-N-methyltransferase                                      | 3.19 |
| BC050196 | CDNA sequence BC050196                                                      | 3.19 |
| Prss12   | Protease, serine, 12 neurotrypsin (motopsin)                                | 3.18 |
| Kcng5    | Potassium voltage-gated channel, subfamily Q, member 5                      | 3.16 |
| Hipk4    | Homeodomain interacting protein kinase 4                                    | 3.15 |
| Enc1     | Ectodermal-neural cortex 1                                                  | 3.11 |
| Ankk1    | Ankyrin repeat and kinase domain containing 1                               | 3.11 |
| Col6a1   | Collagen, type VI, alpha 1                                                  | 3.10 |
| Lzts1    | Leucine zipper, putative tumor suppressor 1                                 | 3.09 |
| Xkrx     | X Kell blood group precursor related X linked                               | 3.09 |
| Trhde    | TRH-degrading enzyme                                                        | 3.08 |
| Accn4    | Amiloride-sensitive cation channel 4, pituitary                             | 3.07 |
| Ucn3     | Urocortin 3                                                                 | 3.07 |
| Ankrd43  | Ankyrin repeat domain 43                                                    | 3.06 |
| Atp2b4   | ATPase, Ca <sup>++</sup> transporting, plasma membrane 4                    | 3.05 |
| Dach1    | Dachshund 1 (Drosophila)                                                    | 3.04 |
| Ccl12    | Chemokine (C-C motif) ligand 12                                             | 3.03 |
| Trpv6    | Transient receptor potential cation channel, subfamily V, member 6          | 3.02 |
| Mchr1    | Melanin-concentrating hormone receptor 1                                    | 3.01 |

|          |                                                                                                                                                     |      |
|----------|-----------------------------------------------------------------------------------------------------------------------------------------------------|------|
| Lyve1    | Lymphatic vessel endothelial hyaluronan receptor 1                                                                                                  | 3.00 |
| Rgs14    | Regulator of G-protein signaling 14                                                                                                                 | 3.00 |
| Mpped1   | Metallophosphoesterase domain containing 1                                                                                                          | 3.00 |
| Rnf39    | Ring finger protein 39                                                                                                                              | 2.99 |
| Cadps2   | Ca <sup>2+</sup> -dependent activator protein for secretion 2                                                                                       | 2.98 |
|          | Transcribed locus, strongly similar to XP_340808.3 similar to obscurin,<br>cytoskeletal calmodulin and titin-interacting RhoGEF [Rattus norvegicus] | 2.97 |
| Rem2     | Rad and gem related GTP binding protein 2                                                                                                           | 2.96 |
| Mctp1    | Multiple C2 domains, transmembrane 1                                                                                                                | 2.96 |
| Myo3b    | Myosin IIIB                                                                                                                                         | 2.96 |
| Pxdn     | Peroxidasin homolog (Drosophila)                                                                                                                    | 2.96 |
| Ngef     | Neuronal guanine nucleotide exchange factor                                                                                                         | 2.94 |
| Rasgef1a | RasGEF domain family, member 1A                                                                                                                     | 2.92 |
| Iqgap2   | IQ motif containing GTPase activating protein 2                                                                                                     | 2.91 |
| Adra2c   | Adrenergic receptor, alpha 2c                                                                                                                       | 2.91 |
| Caacng3  | Calcium channel, voltage-dependent, gamma subunit 3                                                                                                 | 2.90 |
| Bhlhb5   | Basic helix-loop-helix domain containing, class B5                                                                                                  | 2.90 |
| Sstr2    | Somatostatin receptor 2                                                                                                                             | 2.89 |
| Syt6     | Synaptotagmin VI                                                                                                                                    | 2.89 |
| Cdh1     | Cadherin 1                                                                                                                                          | 2.87 |
| Ppp3ca   | Protein phosphatase 3, catalytic subunit, alpha isoform                                                                                             | 2.86 |
| Acvr1c   | Activin A receptor, type IC                                                                                                                         | 2.86 |
| Arpp19   | CAMP-regulated phosphoprotein 19                                                                                                                    | 2.86 |
| Nts      | Neurotensin                                                                                                                                         | 2.86 |
|          | 11 days embryo head cDNA, RIKEN full-length enriched library,<br>clone:6230419C23 product:unclassifiable, full insert sequence                      | 2.85 |
| Gpr83    | G protein-coupled receptor 83                                                                                                                       | 2.84 |
| Asb14    | Ankyrin repeat and SOCS box-containing protein 14                                                                                                   | 2.84 |
| Cnr1     | Cannabinoid receptor 1 (brain)                                                                                                                      | 2.83 |



|          |                                                                                                                                                                         |      |
|----------|-------------------------------------------------------------------------------------------------------------------------------------------------------------------------|------|
| Irs4     | Insulin receptor substrate 4                                                                                                                                            | 2.82 |
| Frzb     | Frizzled-related protein                                                                                                                                                | 2.80 |
| Gsg1     | Germ cell-specific gene 1                                                                                                                                               | 2.80 |
| Rarb     | Retinoic acid receptor, beta                                                                                                                                            | 2.80 |
| Synpo    | Synaptopodin                                                                                                                                                            | 2.79 |
| Moxd1    | Monooxygenase, DBH-like 1                                                                                                                                               | 2.78 |
| Islr2    | Immunoglobulin superfamily containing leucine-rich repeat 2                                                                                                             | 2.78 |
| Rasd2    | RASD family, member 2                                                                                                                                                   | 2.78 |
| Itga8    | Integrin alpha 8                                                                                                                                                        | 2.77 |
| Arhgap10 | Rho GTPase activating protein 10                                                                                                                                        | 2.77 |
| Hpcal4   | Hippocalcin-like 4                                                                                                                                                      | 2.77 |
| Scgn     | Secretagoin, EF-hand calcium binding protein                                                                                                                            | 2.77 |
| Rab40b   | Rab40b, member RAS oncogene family                                                                                                                                      | 2.77 |
| Myh3     | Myosin, heavy polypeptide 3, skeletal muscle, embryonic                                                                                                                 | 2.76 |
| Itga11   | Integrin, alpha 11                                                                                                                                                      | 2.76 |
| Rprm     | Reprimo, TP53 dependent G2 arrest mediator candidate                                                                                                                    | 2.76 |
| Nr4a3    | Nuclear receptor subfamily 4, group A, member 3                                                                                                                         | 2.75 |
| Slc30a3  | Solute carrier family 30 (zinc transporter), member 3                                                                                                                   | 2.75 |
| Gpr26    | G protein-coupled receptor 26                                                                                                                                           | 2.75 |
| Myo5b    | Myosin Vb                                                                                                                                                               | 2.74 |
| Kcnab1   | Potassium voltage-gated channel, shaker-related subfamily, beta member<br>1                                                                                             | 2.74 |
|          | Transcribed locus, moderately similar to XP_001093677.1 similar to<br>calcium/calmodulin-dependent protein kinase kinase 2 beta isoform 1<br>isoform 9 [Macaca mulatta] | 2.74 |
| Actn1    | Actinin, alpha 1                                                                                                                                                        | 2.69 |
| Sec16b   | SEC16 homolog B (S. cerevisiae)                                                                                                                                         | 2.68 |
| Rasgef1c | RasGEF domain family, member 1C                                                                                                                                         | 2.67 |
| Junb     | Jun-B oncogene                                                                                                                                                          | 2.66 |

|         |                                                                                                                                           |      |
|---------|-------------------------------------------------------------------------------------------------------------------------------------------|------|
| Fbx116  | F-box and leucine-rich repeat protein 16                                                                                                  | 2.64 |
| Col6a2  | Collagen, type VI, alpha 2                                                                                                                | 2.63 |
| Slc30a2 | Solute carrier family 30 (zinc transporter), member 2                                                                                     | 2.62 |
| Chrn3   | Cholinergic receptor, nicotinic, beta polypeptide 3                                                                                       | 2.62 |
| Inhba   | Inhibin beta-A                                                                                                                            | 2.62 |
| Cplx2   | Complexin 2                                                                                                                               | 2.61 |
| Scube1  | Signal peptide, CUB domain, EGF-like 1                                                                                                    | 2.61 |
| Dclk3   | Doublecortin-like kinase 3                                                                                                                | 2.61 |
| Camk2a  | Calcium/calmodulin-dependent protein kinase II alpha                                                                                      | 2.60 |
| Acta1   | Actin, alpha 1, skeletal muscle                                                                                                           | 2.60 |
| Tesc    | Tescalcin                                                                                                                                 | 2.58 |
| Ier5    | Immediate early response 5                                                                                                                | 2.57 |
| Mkl2    | MKL/myocardin-like 2                                                                                                                      | 2.56 |
| Nr4a1   | Nuclear receptor subfamily 4, group A, member 1                                                                                           | 2.56 |
| Cdh9    | Cadherin 9                                                                                                                                | 2.56 |
| Rgs4    | Regulator of G-protein signaling 4                                                                                                        | 2.55 |
|         | 0 day neonate cerebellum cDNA, RIKEN full-length enriched library,<br>clone:C230003D17 product:hypothetical protein, full insert sequence | 2.54 |
| Bruno15 | Bruno-like 5, RNA binding protein (Drosophila)                                                                                            | 2.54 |
| Klhl34  | Kelch-like 34 (Drosophila)                                                                                                                | 2.53 |
| Htr1b   | 5-hydroxytryptamine (serotonin) receptor 1B                                                                                               | 2.53 |
| Kcne4   | Potassium voltage-gated channel, Isk-related subfamily, gene 4                                                                            | 2.53 |
| Speg    | SPEG complex locus                                                                                                                        | 2.51 |
| Plxnd1  | Plexin D1                                                                                                                                 | 2.49 |
| Snx26   | Sorting nexin 26                                                                                                                          | 2.49 |
| Sphk1   | Sphingosine kinase 1                                                                                                                      | 2.49 |
| Klf2    | Kruppel-like factor 2 (lung)                                                                                                              | 2.48 |
| Prkcb1  | Protein kinase C, beta 1                                                                                                                  | 2.48 |
| Tmem158 | Transmembrane protein 158                                                                                                                 | 2.48 |
| Acvr1l  | Activin A receptor, type II-like 1                                                                                                        | 2.47 |

|         |                                                                                                                                             |      |
|---------|---------------------------------------------------------------------------------------------------------------------------------------------|------|
| Cpne8   | Copine VIII                                                                                                                                 | 2.47 |
| Slc8a2  | Solute carrier family 8 (sodium/calcium exchanger), member 2                                                                                | 2.47 |
| Chrna5  | Cholinergic receptor, nicotinic, alpha polypeptide 5                                                                                        | 2.45 |
| Foxp2   | Forkhead box P2                                                                                                                             | 2.44 |
| Pcdh21  | Protocadherin 21                                                                                                                            | 2.44 |
| Kcnh5   | Potassium voltage-gated channel, subfamily H (eag-related), member 5                                                                        | 2.44 |
| Anpep   | Alanyl (membrane) aminopeptidase                                                                                                            | 2.44 |
| Gprn3   | GPRIN family member 3                                                                                                                       | 2.43 |
| Gadd45b | Growth arrest and DNA-damage-inducible 45 beta                                                                                              | 2.43 |
| Ldb2    | LIM domain binding 2                                                                                                                        | 2.42 |
| Itpr1   | Inositol 1,4,5-triphosphate receptor 1                                                                                                      | 2.42 |
| Rasl11b | RAS-like, family 11, member B                                                                                                               | 2.42 |
| Foxp1   | Forkhead box P1                                                                                                                             | 2.42 |
| Kit     | Kit oncogene                                                                                                                                | 2.42 |
| Tacr1   | Tachykinin receptor 1                                                                                                                       | 2.41 |
| Dcc     | Deleted in colorectal carcinoma                                                                                                             | 2.40 |
| Pcdhb15 | Protocadherin beta 15                                                                                                                       | 2.40 |
| Skil    | SKI-like                                                                                                                                    | 2.39 |
| Slc22a6 | Solute carrier family 22 (organic anion transporter), member 6                                                                              | 2.39 |
| Gpr139  | G protein-coupled receptor 139                                                                                                              | 2.39 |
| C1r     | Complement component 1, r subcomponent                                                                                                      | 2.39 |
| Msc     | Musculin                                                                                                                                    | 2.38 |
| Myh7    | Myosin, heavy polypeptide 7, cardiac muscle, beta                                                                                           | 2.38 |
| Sbsn    | Suprabasin                                                                                                                                  | 2.37 |
| Tmem90a | Transmembrane protein 90a                                                                                                                   | 2.37 |
| Phyhip  | Phytanoyl-CoA hydroxylase interacting protein                                                                                               | 2.37 |
|         | Transcribed locus, weakly similar to XP_001114243.1 similar to<br>neurotrophic tyrosine kinase, receptor, type 1 isoform 2 [Macaca mulatta] | 2.37 |
| Neurod4 | Neurogenic differentiation 4                                                                                                                | 2.36 |
| Dlk1    | Delta-like 1 homolog (Drosophila)                                                                                                           | 2.36 |

|         |                                                                                                            |      |
|---------|------------------------------------------------------------------------------------------------------------|------|
| Gria2   | Glutamate receptor, ionotropic, AMPA2 (alpha 2)                                                            | 2.35 |
| Acpp    | Acid phosphatase, prostate                                                                                 | 2.35 |
| Rcor2   | REST corepressor 2                                                                                         | 2.35 |
| Sipa111 | Signal-induced proliferation-associated 1 like 1                                                           | 2.33 |
| Ryr2    | Ryanodine receptor 2, cardiac                                                                              | 2.33 |
| Fmn11   | Formin-like 1                                                                                              | 2.33 |
| Npbwr1  | Neuropeptides B/W receptor 1                                                                               | 2.33 |
| Abhd7   | Abhydrolase domain containing 7                                                                            | 2.32 |
| Sv2c    | Synaptic vesicle glycoprotein 2c                                                                           | 2.32 |
| Dgkb    | Diacylglycerol kinase, beta                                                                                | 2.31 |
| Wnt10a  | Wingless related MMTV integration site 10a                                                                 | 2.30 |
| Prkca   | Protein kinase C, alpha                                                                                    | 2.30 |
| Rnasel  | Ribonuclease L (2', 5'-oligoadenylate synthetase-dependent)                                                | 2.29 |
| Prg4    | Proteoglycan 4 (megakaryocyte stimulating factor, articular superficial zone protein)                      | 2.29 |
| Hspb3   | Heat shock protein 3                                                                                       | 2.29 |
| Adcy5   | Adenylate cyclase 5                                                                                        | 2.28 |
| Htr1d   | 5-hydroxytryptamine (serotonin) receptor 1D                                                                | 2.28 |
| Tnfrsf8 | Tumor necrosis factor receptor superfamily, member 8                                                       | 2.27 |
| Mast3   | Microtubule associated serine/threonine kinase 3                                                           | 2.27 |
| Ctxn1   | Cortexin 1                                                                                                 | 2.26 |
| Spnb3   | Spectrin beta 3                                                                                            | 2.26 |
| Neu2    | Neuraminidase 2                                                                                            | 2.25 |
| Gsg11   | GSG1-like                                                                                                  | 2.25 |
| Lrrc6   | Leucine rich repeat containing 6 (testis)                                                                  | 2.25 |
| Npas2   | Neuronal PAS domain protein 2                                                                              | 2.24 |
|         | Transcribed locus, strongly similar to XP_001100347.1 similar to nesprin 1 isoform longer [Macaca mulatta] | 2.24 |
| Btg3    | B-cell translocation gene 3                                                                                | 2.24 |

|             |                                                                                                         |      |
|-------------|---------------------------------------------------------------------------------------------------------|------|
| Myoc        | Myocilin                                                                                                | 2.24 |
| Brs3        | Bombesin-like receptor 3                                                                                | 2.23 |
| BC051142    | CDNA sequence BC051142                                                                                  | 2.23 |
| Trerf1      | Transcriptional regulating factor 1                                                                     | 2.23 |
| Dio2        | Deiodinase, iodothyronine, type II                                                                      | 2.22 |
| Ppp1r9a     | Protein phosphatase 1, regulatory (inhibitor) subunit 9A                                                | 2.22 |
| Foxo1       | Forkhead box O1                                                                                         | 2.21 |
| Tal2        | T-cell acute lymphocytic leukemia 2                                                                     | 2.21 |
| Kcnk2       | Potassium channel, subfamily K, member 2                                                                | 2.21 |
| Rasal1      | RAS protein activator like 1 (GAP1 like)                                                                | 2.21 |
| Kcnj4       | Potassium inwardly-rectifying channel, subfamily J, member 4                                            | 2.20 |
| Olfm4       | Olfactomedin 4                                                                                          | 2.19 |
| Tll1        | Tolloid-like                                                                                            | 2.18 |
| Amhr2       | Anti-Mullerian hormone type 2 receptor                                                                  | 2.18 |
| Tshr        | Thyroid stimulating hormone receptor                                                                    | 2.18 |
| Gm603       | Gene model 603, (NCBI)                                                                                  | 2.17 |
|             | Transcribed locus, weakly similar to XP_001104487.1 eosinophil<br>chemotactic cytokine [Macaca mulatta] | 2.17 |
| D9Erttd280e | DNA segment, Chr 9, ERATO Doi 280, expressed                                                            | 2.17 |
| Prr7        | Proline rich 7 (synaptic)                                                                               | 2.17 |
| Eya1        | Eyes absent 1 homolog (Drosophila)                                                                      | 2.17 |
| Pde8b       | Phosphodiesterase 8B                                                                                    | 2.17 |
| Mmd         | Monocyte to macrophage differentiation-associated                                                       | 2.16 |
| Islr        | Immunoglobulin superfamily containing leucine-rich repeat                                               | 2.16 |
| Plk2        | Polo-like kinase 2 (Drosophila)                                                                         | 2.16 |
| Trpc4       | Transient receptor potential cation channel, subfamily C, member 4                                      | 2.15 |
| Neurl       | Neuralized-like homolog (Drosophila)                                                                    | 2.15 |
| Ror1        | Receptor tyrosine kinase-like orphan receptor 1                                                         | 2.14 |
| Epha4       | Eph receptor A4                                                                                         | 2.14 |
| Chn1        | Chimerin (chimaerin) 1                                                                                  | 2.14 |

|            |                                                               |      |
|------------|---------------------------------------------------------------|------|
| Scarf1     | Scavenger receptor class F, member 1                          | 2.14 |
| Krt10      | Keratin 10                                                    | 2.13 |
| Tuba8      | Tubulin, alpha 8                                              | 2.13 |
| Sertad4    | SERTA domain containing 4                                     | 2.12 |
| Myo1b      | Myosin IB                                                     | 2.12 |
| Jph2       | Junctophilin 2                                                | 2.11 |
| Ccdc88c    | Coiled-coil domain containing 88C                             | 2.11 |
| Efnb2      | Ephrin B2                                                     | 2.10 |
| Ptch2      | Patched homolog 2                                             | 2.10 |
| Tcfap2b    | Transcription factor AP-2 beta                                | 2.09 |
| Camk1g     | Calcium/calmodulin-dependent protein kinase I gamma           | 2.09 |
| Ptk2b      | PTK2 protein tyrosine kinase 2 beta                           | 2.09 |
| Igsf5      | Immunoglobulin superfamily, member 5                          | 2.09 |
| Zfp238     | Zinc finger protein 238                                       | 2.09 |
| Adamts3    | ADAM metalloproteinase with thrombospondin type 1 motif, 3    | 2.08 |
| Tmem132d   | Transmembrane protein 132D                                    | 2.08 |
| Filip1     | Filamin A interacting protein 1                               | 2.08 |
| Lrrk2      | Leucine-rich repeat kinase 2                                  | 2.07 |
| Tusc5      | Tumor suppressor candidate 5                                  | 2.07 |
| Cacng1     | Calcium channel, voltage-dependent, gamma subunit 1           | 2.06 |
| Sebox      | SEBOX homeobox                                                | 2.06 |
| Phactr1    | Phosphatase and actin regulator 1                             | 2.06 |
| Mpped2     | Metallophosphoesterase domain containing 2                    | 2.06 |
| Usp28      | Ubiquitin specific peptidase 28                               | 2.05 |
| Pdzrn3     | PDZ domain containing RING finger 3                           | 2.05 |
| BB146404   | Expressed sequence BB146404                                   | 2.04 |
| D3Bwg0562e | DNA segment, Chr 3, Brigham & Women's Genetics 0562 expressed | 2.04 |
| Catsper2   | Cation channel, sperm associated 2                            | 2.03 |
| Spata2L    | Spermatogenesis associated 2-like                             | 2.02 |
| Prkab2     | Protein kinase, AMP-activated, beta 2 non-catalytic subunit   | 2.02 |

|             |                                                                   |      |
|-------------|-------------------------------------------------------------------|------|
| Lrrc4       | Leucine rich repeat containing 4                                  | 2.02 |
| Glt28d2     | Glycosyltransferase 28 domain containing 2                        | 2.02 |
| Fgf3        | Fibroblast growth factor 3                                        | 2.02 |
| Tmco5       | Transmembrane and coiled-coil domains 5                           | 2.01 |
| Ccdc18      | Coiled-coil domain containing 18                                  | 2.01 |
| Lypd6       | LY6/PLAUR domain containing 6                                     | 2.01 |
| Nog         | Noggin                                                            | 2.01 |
| Mn1         | Meningioma 1                                                      | 2.00 |
| Tle4        | Transducin-like enhancer of split 4, homolog of Drosophila E(spl) | 2.00 |
| Cdkn2d      | Cyclin-dependent kinase inhibitor 2D (p19, inhibits CDK4)         | 1.99 |
| Snca        | Synuclein, alpha                                                  | 1.99 |
| Cdkn1a      | Cyclin-dependent kinase inhibitor 1A (P21)                        | 1.99 |
| D11Bwg0517e | DNA segment, Chr 11, Brigham & Women's Genetics 0517 expressed    | 1.98 |
| Pou3f1      | POU domain, class 3, transcription factor 1                       | 1.98 |
| D17H6S56E-3 | DNA segment, Chr 17, human D6S56E 3                               | 1.97 |
| Prss23      | Protease, serine, 23                                              | 1.97 |
| Ablim2      | Actin-binding LIM protein 2                                       | 1.97 |
| Epor        | Erythropoietin receptor                                           | 1.97 |
| Pla2g4e     | Phospholipase A2, group IVE                                       | 1.96 |
| Pde2a       | Phosphodiesterase 2A, cGMP-stimulated                             | 1.95 |
| Rdh9        | Retinol dehydrogenase 9                                           | 1.95 |
| Rragd       | Ras-related GTP binding D                                         | 1.95 |
| Cenpf       | Centromere protein F                                              | 1.95 |
| Cacnb1      | Calcium channel, voltage-dependent, beta 1 subunit                | 1.94 |
| LOC624784   | Similar to T:G mismatch-specific thymine-DNA glycosylase TDGb     | 1.94 |
| Glce        | Glucuronyl C5-epimerase                                           | 1.94 |
| Zfp365      | Zinc finger protein 365                                           | 1.93 |
| Rspo2       | R-spondin 2 homolog (Xenopus laevis)                              | 1.93 |
| Tcf15       | Transcription factor-like 5 (basic helix-loop-helix)              | 1.93 |
| Epha2       | Eph receptor A2                                                   | 1.93 |

|           |                                                                                                                                 |      |
|-----------|---------------------------------------------------------------------------------------------------------------------------------|------|
| Csmd2     | CUB and Sushi multiple domains 2                                                                                                | 1.93 |
| Mpp3      | Membrane protein, palmitoylated 3 (MAGUK p55 subfamily member 3)                                                                | 1.93 |
| Gpr21     | G protein-coupled receptor 21                                                                                                   | 1.93 |
| Igf2bp2   | Insulin-like growth factor 2 mRNA binding protein 2                                                                             | 1.92 |
| Ets2      | E26 avian leukemia oncogene 2, 3' domain                                                                                        | 1.92 |
| Cd163     | CD163 antigen                                                                                                                   | 1.92 |
| Jph4      | Junctophilin 4                                                                                                                  | 1.91 |
| Crtc1     | CREB regulated transcription coactivator 1                                                                                      | 1.91 |
| Omd       | Osteomodulin                                                                                                                    | 1.91 |
| Atp6v1c2  | ATPase, H <sup>+</sup> transporting, lysosomal V1 subunit C2                                                                    | 1.91 |
| Arhgap6   | Rho GTPase activating protein 6                                                                                                 | 1.90 |
| Wasf1     | WASP family 1                                                                                                                   | 1.90 |
| Cbr3      | Carbonyl reductase 3                                                                                                            | 1.90 |
|           | Transcribed locus, moderately similar to XP_001102239.1 A kinase<br>(PRKA) anchor protein (yotiao) 9 isoform 2 [Macaca mulatta] | 1.90 |
| Ltk       | Leukocyte tyrosine kinase                                                                                                       | 1.90 |
| Dusp14    | Dual specificity phosphatase 14                                                                                                 | 1.90 |
| Strn      | Striatin, calmodulin binding protein                                                                                            | 1.89 |
| Csmd1     | CUB and Sushi multiple domains 1                                                                                                | 1.89 |
| Camk1d    | Calcium/calmodulin-dependent protein kinase ID                                                                                  | 1.89 |
| LOC665683 | Hypothetical LOC665683                                                                                                          | 1.89 |
| Kremen2   | Kringle containing transmembrane protein 2                                                                                      | 1.88 |
| St8sia3   | ST8 alpha-N-acetyl-neuraminide alpha-2,8-sialyltransferase 3                                                                    | 1.88 |
| Lhx2      | LIM homeobox protein 2                                                                                                          | 1.87 |
| Robo2     | Roundabout homolog 2 (Drosophila)                                                                                               | 1.87 |
|           | Transcribed locus, strongly similar to XP_341471.3 similar to WD<br>repeat domain 17 [Rattus norvegicus]                        | 1.87 |
| Diras2    | DIRAS family, GTP-binding RAS-like 2                                                                                            | 1.86 |
| E2f1      | E2F transcription factor 1                                                                                                      | 1.85 |



|         |                                                                                                                                                      |      |
|---------|------------------------------------------------------------------------------------------------------------------------------------------------------|------|
| Slc35d3 | Solute carrier family 35, member D3                                                                                                                  | 1.85 |
| Pgr15l  | G protein-coupled receptor 15-like                                                                                                                   | 1.85 |
| Cox4i2  | Cytochrome c oxidase subunit IV isoform 2                                                                                                            | 1.84 |
| Stard8  | START domain containing 8                                                                                                                            | 1.84 |
| Slc47a1 | Solute carrier family 47, member 1                                                                                                                   | 1.83 |
| Centg1  | Centaurin, gamma 1                                                                                                                                   | 1.83 |
| Rab15   | RAB15, member RAS oncogene family                                                                                                                    | 1.83 |
| Asphd2  | Aspartate beta-hydroxylase domain containing 2                                                                                                       | 1.83 |
| Caacb3  | Calcium channel, voltage-dependent, beta 3 subunit                                                                                                   | 1.82 |
| Bcr     | Breakpoint cluster region homolog                                                                                                                    | 1.81 |
| Frem2   | Fras1 related extracellular matrix protein 2                                                                                                         | 1.81 |
| Rai14   | Retinoic acid induced 14                                                                                                                             | 1.81 |
| Erc2    | ELKS/RAB6-interacting/CAST family member 2                                                                                                           | 1.81 |
| Dgki    | Diacylglycerol kinase, iota                                                                                                                          | 1.81 |
| Slc9a2  | Solute carrier family 9 (sodium/hydrogen exchanger), member 2                                                                                        | 1.80 |
| Tlr9    | Toll-like receptor 9                                                                                                                                 | 1.80 |
| Thrb    | Thyroid hormone receptor beta                                                                                                                        | 1.80 |
| Atp2b1  | ATPase, Ca <sup>++</sup> transporting, plasma membrane 1                                                                                             | 1.80 |
| Man1a   | Mannosidase 1, alpha                                                                                                                                 | 1.79 |
| Cbln2   | Cerebellin 2 precursor protein                                                                                                                       | 1.79 |
| Rasgrp2 | RAS, guanyl releasing protein 2                                                                                                                      | 1.78 |
| Fosl2   | Fos-like antigen 2                                                                                                                                   | 1.78 |
| Limd2   | LIM domain containing 2                                                                                                                              | 1.77 |
| Dcst1   | DC-STAMP domain containing 1                                                                                                                         | 1.77 |
|         | Mammary gland RCB-0526 Jyg-MC(A) cDNA, RIKEN full-length<br>enriched library, clone:G830001D04 product:hypothetical protein, full<br>insert sequence | 1.77 |
| Dlk2    | Delta-like 2 homolog (Drosophila)                                                                                                                    | 1.77 |
| Cacna1h | Calcium channel, voltage-dependent, T type, alpha 1H subunit                                                                                         | 1.77 |

|          |                                                                                           |      |
|----------|-------------------------------------------------------------------------------------------|------|
| Grhl1    | Grainyhead-like 1 (Drosophila)                                                            | 1.77 |
| Fibcd1   | Fibrinogen C domain containing 1                                                          | 1.76 |
| Scube3   | Signal peptide, CUB domain, EGF-like 3                                                    | 1.76 |
| Runx2    | Runt related transcription factor 2                                                       | 1.76 |
| Fat3     | FAT tumor suppressor homolog 3 (Drosophila)                                               | 1.76 |
| Sema3a   | Sema domain, immunoglobulin domain (Ig), short basic domain,<br>secreted, (semaphorin) 3A | 1.75 |
| Sgk      | Serum/glucocorticoid regulated kinase                                                     | 1.75 |
| Ephb6    | Eph receptor B6                                                                           | 1.75 |
| Alcam    | Activated leukocyte cell adhesion molecule                                                | 1.75 |
| Tpsg1    | Tryptase gamma 1                                                                          | 1.74 |
| Fnbp1l   | Formin binding protein 1-like                                                             | 1.74 |
| Abi2     | Abl-interactor 2                                                                          | 1.73 |
| Crocc    | Ciliary rootlet coiled-coil, rootletin                                                    | 1.73 |
| Kcnt2    | Potassium channel, subfamily T, member 2                                                  | 1.72 |
| Plcb2    | Phospholipase C, beta 2                                                                   | 1.72 |
| Pknox2   | Pbx/knotted 1 homeobox 2                                                                  | 1.72 |
| Proz     | Protein Z, vitamin K-dependent plasma glycoprotein                                        | 1.72 |
| Hfe2     | Hemochromatosis type 2 (juvenile) (human homolog)                                         | 1.72 |
| Grin2b   | Glutamate receptor, ionotropic, NMDA2B (epsilon 2)                                        | 1.71 |
| Plxna2   | Plexin A2                                                                                 | 1.71 |
| Per2     | Period homolog 2 (Drosophila)                                                             | 1.71 |
| Etv5     | Ets variant gene 5                                                                        | 1.71 |
| Crispld1 | Cysteine-rich secretory protein LCCL domain containing 1                                  | 1.71 |
| Lingo1   | Leucine rich repeat and Ig domain containing 1                                            | 1.71 |
| Rasl10b  | RAS-like, family 10, member B                                                             | 1.70 |
| Lrrc7    | Leucine rich repeat containing 7                                                          | 1.70 |
| Tgfa     | Transforming growth factor alpha                                                          | 1.70 |
| Klhl3    | Kelch-like 3 (Drosophila)                                                                 | 1.69 |
| Arhgdib  | Rho, GDP dissociation inhibitor (GDI) beta                                                | 1.69 |

|           |                                                                                                                         |      |
|-----------|-------------------------------------------------------------------------------------------------------------------------|------|
| Tmem45a   | Transmembrane protein 45a                                                                                               | 1.69 |
| Gpr44     | G protein-coupled receptor 44                                                                                           | 1.69 |
| Ryr3      | Ryanodine receptor 3                                                                                                    | 1.69 |
| Rgs20     | Regulator of G-protein signaling 20                                                                                     | 1.69 |
| Tyro3     | TYRO3 protein tyrosine kinase 3                                                                                         | 1.67 |
| Mark2     | MAP/microtubule affinity-regulating kinase 2                                                                            | 1.67 |
| Smpd13b   | Sphingomyelin phosphodiesterase, acid-like 3B                                                                           | 1.67 |
| Axud1     | AXIN1 up-regulated 1                                                                                                    | 1.67 |
| Efcbp1    | EF hand calcium binding protein 1                                                                                       | 1.66 |
| Tnfaip8l3 | Tumor necrosis factor, alpha-induced protein 8-like 3                                                                   | 1.66 |
| Grit      | Rho GTPase-activating protein                                                                                           | 1.66 |
| Lix1      | Limb expression 1 homolog (chicken)                                                                                     | 1.66 |
| Fmod      | Fibromodulin                                                                                                            | 1.65 |
| Cacna2d3  | Calcium channel, voltage-dependent, alpha2/delta subunit 3                                                              | 1.65 |
| Stac2     | SH3 and cysteine rich domain 2                                                                                          | 1.65 |
| Hkdc1     | Hexokinase domain containing 1                                                                                          | 1.65 |
| Atp1a1    | ATPase, Na <sup>+</sup> /K <sup>+</sup> transporting, alpha 1 polypeptide                                               | 1.65 |
| Tbc1d8    | TBC1 domain family, member 8                                                                                            | 1.65 |
| Pcdh7     | Protocadherin 7                                                                                                         | 1.65 |
| Snx7      | Sorting nexin 7                                                                                                         | 1.65 |
| Mcm5      | Minichromosome maintenance deficient 5, cell division cycle 46 (S. cerevisiae)                                          | 1.64 |
| Spata13   | Spermatogenesis associated 13                                                                                           | 1.64 |
| Nucb2     | Nucleobindin 2                                                                                                          | 1.64 |
| Sv2b      | Synaptic vesicle glycoprotein 2 b                                                                                       | 1.64 |
|           | Transcribed locus, moderately similar to XP_001104143.1<br>phosphoglycerate mutase 1 (brain) isoform 2 [Macaca mulatta] | 1.64 |
| Scn5a     | Sodium channel, voltage-gated, type V, alpha                                                                            | 1.64 |
| Unc13a    | Unc-13 homolog A (C. elegans)                                                                                           | 1.64 |

|         |                                                                                                                                             |      |
|---------|---------------------------------------------------------------------------------------------------------------------------------------------|------|
| Ccdc42  | Coiled-coil domain containing 42                                                                                                            | 1.64 |
| Oprd1   | Opioid receptor, delta 1                                                                                                                    | 1.64 |
| Slfn2   | Schlafen 2                                                                                                                                  | 1.63 |
| Arg2    | Arginase type II                                                                                                                            | 1.63 |
| Slitrk5 | SLIT and NTRK-like family, member 5                                                                                                         | 1.63 |
| Dmrtc1a | DMRT-like family C1a                                                                                                                        | 1.63 |
| Sec14l1 | SEC14-like 1 ( <i>S. cerevisiae</i> )                                                                                                       | 1.63 |
| Gabre   | Gamma-aminobutyric acid (GABA-A) receptor, subunit epsilon                                                                                  | 1.62 |
| Arl4d   | ADP-ribosylation factor-like 4D                                                                                                             | 1.62 |
| Galr1   | Galanin receptor 1                                                                                                                          | 1.62 |
|         | Transcribed locus, moderately similar to XP_001117391.1 similar to<br>thrombospondin, type I, domain containing 6 [ <i>Macaca mulatta</i> ] | 1.62 |
| Nol4    | Nucleolar protein 4                                                                                                                         | 1.62 |
| Gpr133  | G protein-coupled receptor 133                                                                                                              | 1.62 |
| Frmd6   | FERM domain containing 6                                                                                                                    | 1.62 |
| Gabra5  | Gamma-aminobutyric acid (GABA-A) receptor, subunit alpha 5                                                                                  | 1.62 |
| Plvap   | Plasmalemma vesicle associated protein                                                                                                      | 1.61 |
| Cage1   | Cancer antigen 1                                                                                                                            | 1.61 |
| Cbx6    | Chromobox homolog 6                                                                                                                         | 1.60 |
| Add2    | Adducin 2 (beta)                                                                                                                            | 1.60 |
| Me3     | Malic enzyme 3, NADP(+)-dependent, mitochondrial                                                                                            | 1.60 |
| Ankrd56 | Ankyrin repeat domain 56                                                                                                                    | 1.60 |
| Prkce   | Protein kinase C, epsilon                                                                                                                   | 1.60 |
| Tcf19   | Transcription factor 19                                                                                                                     | 1.60 |
| Gm207   | Gene model 207, (NCBI)                                                                                                                      | 1.59 |
| Lrrc33  | Leucine rich repeat containing 33                                                                                                           | 1.59 |
| Car11   | Carbonic anhydrase 11                                                                                                                       | 1.59 |
| Gpr101  | G protein-coupled receptor 101                                                                                                              | 1.58 |
| Orai2   | Calcium release-activated calcium channel 2                                                                                                 | 1.58 |
| Slc2a1  | Solute carrier organic anion transporter family, member 2a1                                                                                 | 1.58 |

|            |                                                                                                                                 |      |
|------------|---------------------------------------------------------------------------------------------------------------------------------|------|
| Rapgef11   | Rap guanine nucleotide exchange factor (GEF)-like 1                                                                             | 1.57 |
| Lyst       | Lysosomal trafficking regulator                                                                                                 | 1.57 |
| Syt12      | Synaptotagmin XII                                                                                                               | 1.57 |
| Fancd2     | Fanconi anemia, complementation group D2                                                                                        | 1.57 |
| Zswim6     | Zinc finger, SWIM domain containing 6                                                                                           | 1.57 |
| Hmcn1      | Hemicentin 1                                                                                                                    | 1.57 |
| Fgf17      | Fibroblast growth factor 17                                                                                                     | 1.56 |
| Mapk1      | Mitogen activated protein kinase 1                                                                                              | 1.56 |
| Rap2b      | RAP2B, member of RAS oncogene family                                                                                            | 1.56 |
| Eda        | Ectodysplasin-A                                                                                                                 | 1.56 |
|            | Transcribed locus, moderately similar to XP_223454.4 similar to<br>Stromal interaction molecule 2 precursor [Rattus norvegicus] | 1.56 |
| Grin2a     | Glutamate receptor, ionotropic, NMDA2A (epsilon 1)                                                                              | 1.56 |
| Ecm1       | Extracellular matrix protein 1                                                                                                  | 1.56 |
| Cacnb4     | Calcium channel, voltage-dependent, beta 4 subunit                                                                              | 1.55 |
| D12Ert553e | DNA segment, Chr 12, ERATO Doi 553, expressed                                                                                   | 1.55 |
| Kcna5      | Potassium voltage-gated channel, shaker-related subfamily, member 5                                                             | 1.55 |
| Pld3       | Phospholipase D family, member 3                                                                                                | 1.55 |
| Ypel1      | Yippee-like 1 (Drosophila)                                                                                                      | 1.54 |
| Plekhg5    | Pleckstrin homology domain containing, family G (with RhoGef domain)<br>member 5                                                | 1.54 |
| Dock4      | Dedicator of cytokinesis 4                                                                                                      | 1.53 |
| Lrrtm3     | Leucine rich repeat transmembrane neuronal 3                                                                                    | 1.53 |
| N28178     | Expressed sequence N28178                                                                                                       | 1.53 |
| Cdcp1      | CUB domain containing protein 1                                                                                                 | 1.52 |
| Rpusd1     | RNA pseudouridylate synthase domain containing 1                                                                                | 1.52 |
| Tacc1      | Transforming, acidic coiled-coil containing protein 1                                                                           | 1.52 |
| Trim46     | Tripartite motif protein 46                                                                                                     | 1.52 |
| Cyld       | Cylindromatosis (turban tumor syndrome)                                                                                         | 1.52 |

|           |                                                                                                                                    |      |
|-----------|------------------------------------------------------------------------------------------------------------------------------------|------|
| Mapkbp1   | Mitogen activated protein kinase binding protein 1                                                                                 | 1.51 |
| Wdr92     | WD repeat domain 92                                                                                                                | 1.51 |
| Atf3      | Activating transcription factor 3                                                                                                  | 1.51 |
| Lox       | Lysyl oxidase                                                                                                                      | 1.51 |
| Arhgap20  | Rho GTPase activating protein 20                                                                                                   | 1.51 |
|           | Mus musculus, clone IMAGE:4219318, mRNA                                                                                            | 1.51 |
| Ccdc112   | Coiled-coil domain containing 112                                                                                                  | 1.51 |
| Pak7      | P21 (CDKN1A)-activated kinase 7                                                                                                    | 1.50 |
| Slc26a8   | Solute carrier family 26, member 8                                                                                                 | 1.50 |
| Ntng2     | Netrin G2                                                                                                                          | 1.50 |
| Tmem46    | Transmembrane protein 46                                                                                                           | 1.49 |
| Cugbp1    | CUG triplet repeat, RNA binding protein 1                                                                                          | 1.49 |
| Slc16a7   | Solute carrier family 16 (monocarboxylic acid transporters), member 7                                                              | 1.49 |
| Rgs7bp    | Regulator of G-protein signalling 7 binding protein                                                                                | 1.49 |
| Btg2      | B-cell translocation gene 2, anti-proliferative                                                                                    | 1.49 |
| Arf3      | ADP-ribosylation factor 3                                                                                                          | 1.48 |
| Diap1     | Diaphanous homolog 1 (Drosophila)                                                                                                  | 1.48 |
|           | Adult male hypothalamus cDNA, RIKEN full-length enriched library,<br>clone:A230069E07 product:unclassifiable, full insert sequence | 1.48 |
| Tnfrsf11b | Tumor necrosis factor receptor superfamily, member 11b<br>(osteoprotegerin)                                                        | 1.48 |
| Mc4r      | Melanocortin 4 receptor                                                                                                            | 1.48 |
| Ltbp1     | Latent transforming growth factor beta binding protein 1                                                                           | 1.47 |
| Per3      | Period homolog 3 (Drosophila)                                                                                                      | 1.47 |
| Dab1      | Disabled homolog 1 (Drosophila)                                                                                                    | 1.47 |
|           | CDNA, clone:Y0G0107D21, strand:minus,<br>reference:ENSEMBL:Mouse-Transcript-ENST:ENSMUST00000042251,<br>based on BLAT search       | 1.46 |
| Mical2    | Microtubule associated monooxygenase, calponin and LIM domain<br>containing 2                                                      | 1.46 |

|         |                                                                                                      |      |
|---------|------------------------------------------------------------------------------------------------------|------|
| Mme     | Membrane metallo endopeptidase                                                                       | 1.46 |
| Col5a2  | Collagen, type V, alpha 2                                                                            | 1.46 |
| Itga9   | Integrin alpha 9                                                                                     | 1.45 |
| Npy     | Neuropeptide Y                                                                                       | 1.45 |
| Atf6    | Activating transcription factor 6                                                                    | 1.45 |
| Slc7a4  | Solute carrier family 7 (cationic amino acid transporter, y+ system),<br>member 4                    | 1.45 |
| Rps6ka5 | Ribosomal protein S6 kinase, polypeptide 5                                                           | 1.45 |
| Dusp11  | Dual specificity phosphatase 11 (RNA/RNP complex 1-interacting)                                      | 1.45 |
| Syt5    | Synaptotagmin V                                                                                      | 1.44 |
| Gnal    | Guanine nucleotide binding protein, alpha stimulating, olfactory type                                | 1.44 |
| Sntb2   | Syntrophin, basic 2                                                                                  | 1.44 |
| Wnt5b   | Wingless-related MMTV integration site 5B                                                            | 1.44 |
| Dbn1    | Drebrin 1                                                                                            | 1.44 |
| Prmt8   | Protein arginine N-methyltransferase 8                                                               | 1.43 |
| Tiam2   | T-cell lymphoma invasion and metastasis 2                                                            | 1.43 |
| Tram2   | Translocating chain-associating membrane protein 2                                                   | 1.43 |
| Arhgef9 | Cdc42 guanine nucleotide exchange factor (GEF) 9                                                     | 1.43 |
| Nbea    | Neurobeachin                                                                                         | 1.43 |
| Myt1l   | Myelin transcription factor 1-like                                                                   | 1.43 |
| Nfkbiz  | Nuclear factor of kappa light polypeptide gene enhancer in B-cells<br>inhibitor, zeta                | 1.42 |
| Lgi1    | Leucine-rich repeat LGI family, member 1                                                             | 1.42 |
| Camk2n1 | Calcium/calmodulin-dependent protein kinase II inhibitor 1                                           | 1.42 |
| Ctla2a  | Cytotoxic T lymphocyte-associated protein 2 alpha                                                    | 1.42 |
| Sh3md4  | SH3 multiple domains 4                                                                               | 1.42 |
| Myom3   | Myomesin family, member 3                                                                            | 1.42 |
| Smardc1 | SWI/SNF related, matrix associated, actin dependent regulator of<br>chromatin, subfamily d, member 1 | 1.42 |

|           |                                                              |      |
|-----------|--------------------------------------------------------------|------|
| Tshz3     | Teashirt zinc finger family member 3                         | 1.41 |
| Gse1      | Genetic suppressor element 1                                 | 1.41 |
| Grik5     | Glutamate receptor, ionotropic, kainate 5 (gamma 2)          | 1.41 |
| Lba1      | Lupus brain antigen 1                                        | 1.41 |
| C1qtnf1   | C1q and tumor necrosis factor related protein 1              | 1.41 |
| Zfp459    | Zinc finger protein 459                                      | 1.41 |
| Ctnnap3   | Contactin associated protein-like 3                          | 1.41 |
| Slc39a10  | Solute carrier family 39 (zinc transporter), member 10       | 1.41 |
| Gm1060    | Gene model 1060, (NCBI)                                      | 1.40 |
| Slc26a7   | Solute carrier family 26, member 7                           | 1.40 |
| Pip5k1a   | Phosphatidylinositol-4-phosphate 5-kinase, type 1 alpha      | 1.40 |
| Rgl1      | Ral guanine nucleotide dissociation stimulator,-like 1       | 1.40 |
| Rps6ka3   | Ribosomal protein S6 kinase polypeptide 3                    | 1.39 |
| Anks1b    | Ankyrin repeat and sterile alpha motif domain containing 1B  | 1.39 |
| Tnfaip3   | Tumor necrosis factor, alpha-induced protein 3               | 1.38 |
| Klf9      | Kruppel-like factor 9                                        | 1.38 |
| Zfyve28   | Zinc finger, FYVE domain containing 28                       | 1.38 |
| Zfp533    | Zinc finger protein 533                                      | 1.38 |
| Sprn      | Shadow of prion protein                                      | 1.38 |
| Nfx1      | Nuclear transcription factor, X-box binding 1                | 1.37 |
| Tmtc1     | Transmembrane and tetratricopeptide repeat containing 1      | 1.37 |
| Car12     | Carbonic anhydrase 12                                        | 1.37 |
| Ncan      | Neurocan                                                     | 1.37 |
| Lmtk2     | Lemur tyrosine kinase 2                                      | 1.37 |
| Kcnk6     | Potassium inwardly-rectifying channel, subfamily K, member 6 | 1.37 |
| Ski       | Sloan-Kettering viral oncogene homolog                       | 1.37 |
| LOC620695 | Hypothetical protein LOC620695                               | 1.37 |
| P2rx11    | Purinergic receptor P2X-like 1, orphan receptor              | 1.37 |
| Nek2      | NIMA (never in mitosis gene a)-related expressed kinase 2    | 1.36 |
| Gins2     | GINS complex subunit 2 (Psf2 homolog)                        | 1.36 |



|            |                                                         |      |
|------------|---------------------------------------------------------|------|
| Efna3      | Ephrin A3                                               | 1.35 |
| Tspan11    | Tetraspanin 11                                          | 1.35 |
| Bbc3       | Bcl-2 binding component 3                               | 1.35 |
| Crabp2     | Cellular retinoic acid binding protein II               | 1.35 |
| Thbd       | Thrombomodulin                                          | 1.35 |
| Prkar2b    | Protein kinase, cAMP dependent regulatory, type II beta | 1.35 |
| Cdh22      | Cadherin 22                                             | 1.35 |
| Tmem120b   | Transmembrane protein 120B                              | 1.35 |
| Mgl1       | Monoglyceride lipase                                    | 1.35 |
| Gfod1      | Glucose-fructose oxidoreductase domain containing 1     | 1.35 |
| Lrrc8b     | Leucine rich repeat containing 8 family, member B       | 1.35 |
| Srr        | Serine racemase                                         | 1.34 |
| Kbtbd11    | Kelch repeat and BTB (POZ) domain containing 11         | 1.34 |
| Mkl1       | MKL (megakaryoblastic leukemia)/myocardin-like 1        | 1.34 |
| Ccdc131    | Coiled-coil domain containing 131                       | 1.34 |
| Nlgn1      | Neuroigin 1                                             | 1.34 |
| Rab39      | RAB39, member RAS oncogene family                       | 1.34 |
| Stk32c     | Serine/threonine kinase 32C                             | 1.34 |
| Negr1      | Neuronal growth regulator 1                             | 1.34 |
| Sh3pxd2a   | SH3 and PX domains 2A                                   | 1.34 |
| A530080P10 | Hypothetical protein A530080P10                         | 1.33 |
| Erf        | Ets2 repressor factor                                   | 1.33 |
| Snph       | Syntaphilin                                             | 1.33 |
| Gpd1       | Glycerol-3-phosphate dehydrogenase 1 (soluble)          | 1.33 |
| Sh3tc1     | SH3 domain and tetratricopeptide repeats 1              | 1.33 |
| Gp1bb      | Glycoprotein Ib, beta polypeptide                       | 1.32 |
| Zbtb16     | Zinc finger and BTB domain containing 16                | 1.32 |
| Rgs2       | Regulator of G-protein signaling 2                      | 1.32 |
| C78409     | Expressed sequence C78409                               | 1.31 |
| Cx3cl1     | Chemokine (C-X3-C motif) ligand 1                       | 1.31 |

|          |                                                                                                                                   |      |
|----------|-----------------------------------------------------------------------------------------------------------------------------------|------|
| Slmo1    | Slowmo homolog 1 ( <i>Drosophila</i> )                                                                                            | 1.31 |
| Gpr135   | G protein-coupled receptor 135                                                                                                    | 1.31 |
| Ccnd2    | Cyclin D2                                                                                                                         | 1.30 |
| Col4a5   | Collagen, type IV, alpha 5                                                                                                        | 1.30 |
| Mafb     | V-maf musculoaponeurotic fibrosarcoma oncogene family, protein B<br>(avian)                                                       | 1.30 |
| Chrm3    | Cholinergic receptor, muscarinic 3, cardiac                                                                                       | 1.30 |
| Sfrs18   | Splicing factor, arginine/serine-rich 18                                                                                          | 1.29 |
| Prrt1    | Proline-rich transmembrane protein 1                                                                                              | 1.29 |
| Grik2    | Glutamate receptor, ionotropic, kainate 2 (beta 2)                                                                                | 1.29 |
| Rxfp3    | Relaxin family peptide receptor 3                                                                                                 | 1.29 |
| Extl1    | Exostoses (multiple)-like 1                                                                                                       | 1.29 |
| Aff1     | AF4/FMR2 family, member 1                                                                                                         | 1.29 |
|          | Transcribed locus, weakly similar to XP_001107984.1 similar to<br>HMG2 like isoform 1 [ <i>Macaca mulatta</i> ]                   | 1.29 |
| Cdc42ep3 | CDC42 effector protein (Rho GTPase binding) 3                                                                                     | 1.29 |
| Bdnf     | Brain derived neurotrophic factor                                                                                                 | 1.29 |
| Ccl27    | Chemokine (C-C motif) ligand 27                                                                                                   | 1.29 |
| Inha     | Inhibin alpha                                                                                                                     | 1.29 |
| Pla2g4b  | Phospholipase A2, group IVB (cytosolic)                                                                                           | 1.29 |
| Oaf      | OAF homolog ( <i>Drosophila</i> )                                                                                                 | 1.28 |
|          | Transcribed locus, moderately similar to XP_001107400.1 similar to<br>amphoterin-induced gene and ORF 3 [ <i>Macaca mulatta</i> ] | 1.28 |
| Cap2     | CAP, adenylate cyclase-associated protein, 2 (yeast)                                                                              | 1.28 |
| Mpzl3    | Myelin protein zero-like 3                                                                                                        | 1.28 |
| Tm2d3    | TM2 domain containing 3                                                                                                           | 1.28 |
| Dock3    | Dedicator of cyto-kinesis 3                                                                                                       | 1.28 |
| Cd248    | CD248 antigen, endosialin                                                                                                         | 1.28 |
| Fosl1    | Fos-like antigen 1                                                                                                                | 1.27 |

|         |                                                                                     |      |
|---------|-------------------------------------------------------------------------------------|------|
| Ccl28   | Chemokine (C-C motif) ligand 28                                                     | 1.27 |
| Col23a1 | Collagen, type XXIII, alpha 1                                                       | 1.27 |
| Kcnb1   | Potassium voltage gated channel, Shab-related subfamily, member 1                   | 1.27 |
| Srf     | Serum response factor                                                               | 1.26 |
| Jph3    | Junctophilin 3                                                                      | 1.26 |
| Btrc    | Beta-transducin repeat containing protein                                           | 1.26 |
| Jph1    | Junctophilin 1                                                                      | 1.26 |
| Gpr158  | G protein-coupled receptor 158                                                      | 1.26 |
| Thsd7a  | Thrombospondin, type I, domain containing 7A                                        | 1.26 |
| Nab2    | Ngfi-A binding protein 2                                                            | 1.26 |
| Igsf21  | Immunoglobulin superfamily, member 21                                               | 1.26 |
| Npnt    | Nephronectin                                                                        | 1.25 |
| Sema4f  | Sema domain, immunoglobulin domain (Ig), TM domain, and short cytoplasmic domain    | 1.25 |
| Osbpl8  | Oxysterol binding protein-like 8                                                    | 1.25 |
| Dlg4    | Discs, large homolog 4 (Drosophila)                                                 | 1.25 |
| Nfyb    | Nuclear transcription factor-Y beta                                                 | 1.24 |
| Shank2  | SH3/ankyrin domain gene 2                                                           | 1.24 |
| Rgs8    | Regulator of G-protein signaling 8                                                  | 1.24 |
| Spcs3   | Signal peptidase complex subunit 3 homolog (S. cerevisiae)                          | 1.24 |
| Sept5   | Septin 5                                                                            | 1.24 |
| Mink1   | Misshapen-like kinase 1 (zebrafish)                                                 | 1.24 |
| Gpr27   | G protein-coupled receptor 27                                                       | 1.24 |
| Zcchc14 | Zinc finger, CCHC domain containing 14                                              | 1.23 |
| Rbm24   | RNA binding motif protein 24                                                        | 1.23 |
| Galnt14 | UDP-N-acetyl-alpha-D-galactosamine:polypeptide N-acetylgalactosaminyltransferase 14 | 1.23 |
| Rundc3b | RUN domain containing 3B                                                            | 1.23 |
| Gnb5    | Guanine nucleotide binding protein, beta 5                                          | 1.23 |

|          |                                                                                     |      |
|----------|-------------------------------------------------------------------------------------|------|
| Pip5k1c  | Phosphatidylinositol-4-phosphate 5-kinase, type 1 gamma                             | 1.22 |
| Map2k1   | Mitogen activated protein kinase kinase 1                                           | 1.22 |
| Prtg     | Protogenin homolog (Gallus gallus)                                                  | 1.22 |
| Zfp189   | Zinc finger protein 189                                                             | 1.22 |
| Epb4.9   | Erythrocyte protein band 4.9                                                        | 1.22 |
| Tusc3    | Tumor suppressor candidate 3                                                        | 1.22 |
| Arhgap26 | Rho GTPase activating protein 26                                                    | 1.22 |
| Npy1r    | Neuropeptide Y receptor Y1                                                          | 1.22 |
| Efcfb2   | EF hand calcium binding protein 2                                                   | 1.22 |
| Lrrtm4   | Leucine rich repeat transmembrane neuronal 4                                        | 1.22 |
| Ikzf4    | IKAROS family zinc finger 4                                                         | 1.22 |
| Glcci1   | Glucocorticoid induced transcript 1                                                 | 1.21 |
| Centb5   | Centaurin, beta 5                                                                   | 1.21 |
| Tanc2    | Tetratricopeptide repeat, ankyrin repeat and coiled-coil containing 2               | 1.21 |
| Ivns1abp | Influenza virus NS1A binding protein                                                | 1.21 |
| Ptprr    | Protein tyrosine phosphatase, receptor type, R                                      | 1.21 |
| Apba2bp  | Amyloid beta (A4) precursor protein-binding, family A, member 2<br>binding protein  | 1.21 |
| Pnma1    | Paraneoplastic antigen MA1                                                          | 1.20 |
| Ppp2r2a  | Protein phosphatase 2 (formerly 2A), regulatory subunit B (PR 52), alpha<br>isoform | 1.20 |
| Cyfip2   | Cytoplasmic FMR1 interacting protein 2                                              | 1.20 |
| Sfrp1    | Secreted frizzled-related protein 1                                                 | 1.20 |
| Acpl2    | Acid phosphatase-like 2                                                             | 1.20 |
| Cdh4     | Cadherin 4                                                                          | 1.20 |
| Coro2b   | Coronin, actin binding protein, 2B                                                  | 1.20 |
| Xtrp3s1  | X transporter protein 3 similar 1 gene                                              | 1.20 |
| Bsn      | Bassoon                                                                             | 1.20 |
| Ctnbp2   | Cortactin binding protein 2                                                         | 1.20 |

|          |                                                                             |      |
|----------|-----------------------------------------------------------------------------|------|
| Chst1    | Carbohydrate (keratan sulfate Gal-6) sulfotransferase 1                     | 1.19 |
| Tef      | Thyrotroph embryonic factor                                                 | 1.19 |
| Kcnf1    | Potassium voltage-gated channel, subfamily F, member 1                      | 1.19 |
| Thbs4    | Thrombospondin 4                                                            | 1.19 |
| Ppp1r16b | Protein phosphatase 1, regulatory (inhibitor) subunit 16B                   | 1.19 |
| Arntl    | Aryl hydrocarbon receptor nuclear translocator-like                         | 1.19 |
| Entpd3   | Ectonucleoside triphosphate diphosphohydrolase 3                            | 1.19 |
| Pde5a    | Phosphodiesterase 5A, cGMP-specific                                         | 1.19 |
| Ogn      | Osteoglycin                                                                 | 1.18 |
| B4galnt1 | Beta-1,4-N-acetyl-galactosaminyl transferase 1                              | 1.18 |
| Atp8a1   | ATPase, aminophospholipid transporter (APLT), class I, type 8A,<br>member 1 | 1.18 |
| Otof     | Otoferlin                                                                   | 1.18 |
| Ahctf1   | AT hook containing transcription factor 1                                   | 1.18 |
| Htr4     | 5 hydroxytryptamine (serotonin) receptor 4                                  | 1.17 |
| Nxph4    | Neurexophilin 4                                                             | 1.17 |
| Mtap9    | Microtubule-associated protein 9                                            | 1.17 |
| BC046404 | CDNA sequence BC046404                                                      | 1.17 |
| Trib3    | Tribbles homolog 3 (Drosophila)                                             | 1.17 |
| Tmem44   | Transmembrane protein 44                                                    | 1.17 |
| Maml3    | Mastermind like 3 (Drosophila)                                              | 1.17 |
| Edn1     | Endothelin 1                                                                | 1.17 |
| Csmd3    | CUB and Sushi multiple domains 3                                            | 1.16 |
| Arhgef2  | Rho/rac guanine nucleotide exchange factor (GEF) 2                          | 1.16 |
| Per1     | Period homolog 1 (Drosophila)                                               | 1.16 |
| Psd4     | Pleckstrin and Sec7 domain containing 4                                     | 1.16 |
| Pip4k2c  | Phosphatidylinositol-5-phosphate 4-kinase, type II, gamma                   | 1.16 |
| Tomm70a  | Translocase of outer mitochondrial membrane 70 homolog A (yeast)            | 1.16 |
| Myh11    | Myosin, heavy polypeptide 11, smooth muscle                                 | 1.16 |
| Ifrd1    | Interferon-related developmental regulator 1                                | 1.15 |

|         |                                                                                                                             |      |
|---------|-----------------------------------------------------------------------------------------------------------------------------|------|
| Actr3b  | ARP3 actin-related protein 3 homolog B (yeast)                                                                              | 1.15 |
| Gipc2   | GIPC PDZ domain containing family, member 2                                                                                 | 1.15 |
| Mtpn    | Myotrophin                                                                                                                  | 1.15 |
| Gng4    | Guanine nucleotide binding protein (G protein), gamma 4 subunit                                                             | 1.15 |
|         | CDNA, clone:Y2G0115A01, strand:plus,<br>reference:ENSEMBL:Mouse-Transcript-ENST:ENSMUST00000040967,<br>based on BLAT search | 1.15 |
| Nxph3   | Neurexophilin 3                                                                                                             | 1.14 |
| Dlx6    | Distal-less homeobox 6                                                                                                      | 1.14 |
| Lphn1   | Latrophilin 1                                                                                                               | 1.14 |
| Prkcz   | Protein kinase C, zeta                                                                                                      | 1.14 |
| Cited4  | Cbp/p300-interacting transactivator, with Glu/Asp-rich carboxy-terminal<br>domain, 4                                        | 1.14 |
| Lmcd1   | LIM and cysteine-rich domains 1                                                                                             | 1.14 |
| Ippk    | Inositol 1,3,4,5,6-pentakisphosphate 2-kinase                                                                               | 1.14 |
| Icam2   | Intercellular adhesion molecule 2                                                                                           | 1.14 |
| Espn    | Espin                                                                                                                       | 1.14 |
| Zdhhc14 | Zinc finger, DHHC domain containing 14                                                                                      | 1.14 |
| Pde4b   | Phosphodiesterase 4B, cAMP specific                                                                                         | 1.13 |
| Gldc    | Glycine decarboxylase                                                                                                       | 1.13 |
| Gucy1b3 | Guanylate cyclase 1, soluble, beta 3                                                                                        | 1.13 |
| Rgs12   | Regulator of G-protein signaling 12                                                                                         | 1.13 |
| Rnf169  | Ring finger protein 169                                                                                                     | 1.13 |
| Rasgrf2 | RAS protein-specific guanine nucleotide-releasing factor 2                                                                  | 1.13 |
| Samd8   | Sterile alpha motif domain containing 8                                                                                     | 1.13 |
| Fem1a   | Feminization 1 homolog a (C. elegans)                                                                                       | 1.13 |
| Lrp1b   | Low density lipoprotein-related protein 1B (deleted in tumors)                                                              | 1.13 |
| Rims1   | Regulating synaptic membrane exocytosis 1                                                                                   | 1.13 |
| Ppp1r1a | Protein phosphatase 1, regulatory (inhibitor) subunit 1A                                                                    | 1.13 |

|          |                                                                                                                     |      |
|----------|---------------------------------------------------------------------------------------------------------------------|------|
| Ddit4l   | DNA-damage-inducible transcript 4-like                                                                              | 1.13 |
| Rundc1   | RUN domain containing 1                                                                                             | 1.13 |
| Pitpnm2  | Phosphatidylinositol transfer protein, membrane-associated 2                                                        | 1.13 |
| Prickle2 | Prickle-like 2 (Drosophila)                                                                                         | 1.12 |
| Slc35f3  | Solute carrier family 35, member F3                                                                                 | 1.12 |
| Zfp239   | Zinc finger protein 239                                                                                             | 1.12 |
| P2ry1    | Purinergic receptor P2Y, G-protein coupled 1                                                                        | 1.12 |
| Fras1    | Fraser syndrome 1 homolog (human)                                                                                   | 1.12 |
| Erlin1   | ER lipid raft associated 1                                                                                          | 1.11 |
| Wnt2b    | Wingless related MMTV integration site 2b                                                                           | 1.11 |
| Cyb561d1 | Cytochrome b-561 domain containing 1                                                                                | 1.11 |
| Bcl6b    | B-cell CLL/lymphoma 6, member B                                                                                     | 1.11 |
| Ext1     | Exostoses (multiple) 1                                                                                              | 1.11 |
| Fbxo41   | F-box protein 41                                                                                                    | 1.11 |
| Trrap    | Transformation/transcription domain-associated protein                                                              | 1.11 |
| Sema4a   | Sema domain, immunoglobulin domain (Ig), transmembrane domain<br>(TM) and short cytoplasmic domain, (semaphorin) 4A | 1.11 |
| Hvcn1    | Hydrogen voltage-gated channel 1                                                                                    | 1.11 |
| Lmo2     | LIM domain only 2                                                                                                   | 1.11 |
| Lrrc4c   | Leucine rich repeat containing 4C                                                                                   | 1.11 |
| C1qtnf6  | C1q and tumor necrosis factor related protein 6                                                                     | 1.11 |
| Eya2     | Eyes absent 2 homolog (Drosophila)                                                                                  | 1.10 |
| Zfp711   | Zinc finger protein 711                                                                                             | 1.10 |
| Ints7    | Integrator complex subunit 7                                                                                        | 1.10 |
| Unc84a   | Unc-84 homolog A (C. elegans)                                                                                       | 1.10 |
| Zfp36    | Zinc finger protein 36                                                                                              | 1.09 |
| Plekhh2  | Pleckstrin homology domain containing, family H (with MyTH4 domain)<br>member 2                                     | 1.09 |
| Fstl4    | Follistatin-like 4                                                                                                  | 1.09 |

|          |                                                                       |      |
|----------|-----------------------------------------------------------------------|------|
| E2f3     | E2F transcription factor 3                                            | 1.09 |
| Gzmm     | Granzyme M (lymphocyte met-ase 1)                                     | 1.09 |
| Rock2    | Rho-associated coiled-coil containing protein kinase 2                | 1.08 |
| Jmjd1a   | Jumonji domain containing 1A                                          | 1.08 |
| Klhl23   | Kelch-like 23 (Drosophila)                                            | 1.08 |
| Tsr1     | TSR1, 20S rRNA accumulation, homolog (yeast)                          | 1.08 |
| Med14    | Mediator complex subunit 14                                           | 1.08 |
| Prss35   | Protease, serine, 35                                                  | 1.08 |
| B3galt2  | UDP-Gal:betaGlcNAc beta 1,3-galactosyltransferase, polypeptide 2      | 1.08 |
| Lamb1-1  | Laminin B1 subunit 1                                                  | 1.08 |
| Dlg1     | Discs, large homolog 1 (Drosophila)                                   | 1.08 |
| Brpf3    | Bromodomain and PHD finger containing, 3                              | 1.08 |
| Sertad2  | SERTA domain containing 2                                             | 1.08 |
| Slc9a5   | Solute carrier family 9 (sodium/hydrogen exchanger), member 5         | 1.08 |
| Sipa1l3  | Signal-induced proliferation-associated 1 like 3                      | 1.07 |
| Ubn1     | Ubiquitin 1                                                           | 1.07 |
| Coch     | Coagulation factor C homolog (Limulus polyphemus)                     | 1.07 |
| Pcsk1    | Proprotein convertase subtilisin/kexin type 1                         | 1.07 |
| Nr2e1    | Nuclear receptor subfamily 2, group E, member 1                       | 1.07 |
| Josd1    | Josephin domain containing 1                                          | 1.07 |
| Slit3    | Slit homolog 3 (Drosophila)                                           | 1.06 |
| Rnf165   | Ring finger protein 165                                               | 1.06 |
| Cacng8   | Calcium channel, voltage-dependent, gamma subunit 8                   | 1.06 |
| Slc16a2  | Solute carrier family 16 (monocarboxylic acid transporters), member 2 | 1.06 |
| Nuak1    | NUAK family, SNF1-like kinase, 1                                      | 1.06 |
| BC002199 | CDNA sequence BC002199                                                | 1.06 |
| Creg2    | Cellular repressor of E1A-stimulated genes 2                          | 1.06 |
| Tmem132b | Transmembrane protein 132B                                            | 1.06 |
| Tia1     | Cytotoxic granule-associated RNA binding protein 1                    | 1.06 |
| Plcxdl   | Phosphatidylinositol-specific phospholipase C, X domain containing 1  | 1.06 |



|          |                                                                  |      |
|----------|------------------------------------------------------------------|------|
| H2-DMa   | Histocompatibility 2, class II, locus DMa                        | 1.06 |
| Nmnat3   | Nicotinamide nucleotide adenylyltransferase 3                    | 1.06 |
| Tmem16a  | Transmembrane protein 16A                                        | 1.06 |
| Cdc40    | Cell division cycle 40 homolog (yeast)                           | 1.05 |
| Mras     | Muscle and microspikes RAS                                       | 1.05 |
| Wnt6     | Wingless-related MMTV integration site 6                         | 1.05 |
| Lrfn2    | Leucine rich repeat and fibronectin type III domain containing 2 | 1.05 |
| Hes1     | Hairy and enhancer of split 1 (Drosophila)                       | 1.05 |
| Zdhhc13  | Zinc finger, DHHC domain containing 13                           | 1.05 |
| Slitrk2  | SLIT and NTRK-like family, member 2                              | 1.04 |
| Car10    | Carbonic anhydrase 10                                            | 1.04 |
| Pou6f1   | POU domain, class 6, transcription factor 1                      | 1.04 |
| Commd1   | COMM domain containing 1                                         | 1.04 |
| Nkx3-1   | NK-3 transcription factor, locus 1 (Drosophila)                  | 1.04 |
| Inpp5d   | Inositol polyphosphate-5-phosphatase D                           | 1.04 |
| Hivep3   | Human immunodeficiency virus type I enhancer binding protein 3   | 1.04 |
| Darc     | Duffy blood group, chemokine receptor                            | 1.04 |
| Spred1   | Sprouty protein with EVH-1 domain 1, related sequence            | 1.04 |
| Bcor     | Bcl6 interacting corepressor                                     | 1.04 |
| Acot3    | Acyl-CoA thioesterase 3                                          | 1.04 |
| Perld1   | Per1-like domain containing 1                                    | 1.03 |
| Hrbl     | HIV-1 Rev binding protein-like                                   | 1.03 |
| Foxo3a   | Forkhead box O3a                                                 | 1.03 |
| Zfp280c  | Zinc finger protein 280c                                         | 1.03 |
| Snn      | Stannin                                                          | 1.03 |
| Prkag2   | Protein kinase, AMP-activated, gamma 2 non-catalytic subunit     | 1.02 |
| BC057893 | CDNA sequence BC057893                                           | 1.02 |
| Gal3st3  | Galactose-3-O-sulfotransferase 3                                 | 1.02 |
| Syt12    | Synaptotagmin-like 2                                             | 1.02 |
| Matn2    | Matrilin 2                                                       | 1.02 |

|          |                                                                                            |      |
|----------|--------------------------------------------------------------------------------------------|------|
| Ddit4    | DNA-damage-inducible transcript 4                                                          | 1.02 |
| Arid3a   | AT rich interactive domain 3A (Bright like)                                                | 1.02 |
| Hrh1     | Histamine receptor H 1                                                                     | 1.02 |
| Pik3r2   | Phosphatidylinositol 3-kinase, regulatory subunit, polypeptide 2 (p85<br>beta)             | 1.02 |
| Cacna1a  | Calcium channel, voltage-dependent, P/Q type, alpha 1A subunit                             | 1.02 |
| Gpr124   | G protein-coupled receptor 124                                                             | 1.01 |
| Dusp6    | Dual specificity phosphatase 6                                                             | 1.01 |
| BC043118 | CDNA sequence BC043118                                                                     | 1.01 |
| March4   | Membrane-associated ring finger (C3HC4) 4                                                  | 1.01 |
| Sidt1    | SID1 transmembrane family, member 1                                                        | 1.01 |
| Bai3     | Brain-specific angiogenesis inhibitor 3                                                    | 1.01 |
| Ppp1r10  | Protein phosphatase 1, regulatory subunit 10                                               | 1.01 |
|          | Transcribed locus, strongly similar to NP_079698.2 antigen [Mus<br>musculus]               | 1.01 |
| Galnt2   | UDP-N-acetyl-alpha-D-galactosamine:polypeptide<br>N-acetylgalactosaminyltransferase-like 2 | 1.00 |
| Cpxm1    | Carboxypeptidase X 1 (M14 family)                                                          | 1.00 |
| Shf      | Src homology 2 domain containing F                                                         | 1.00 |
| Smg7     | Smg-7 homolog, nonsense mediated mRNA decay factor (C. elegans)                            | 1.00 |
| Socs3    | Suppressor of cytokine signaling 3                                                         | 1.00 |
| Slc24a2  | Solute carrier family 24 (sodium/potassium/calcium exchanger), member<br>2                 | 1.00 |
| St3gal1  | ST3 beta-galactoside alpha-2,3-sialyltransferase 1                                         | 0.99 |
| Lrrc55   | Leucine rich repeat containing 55                                                          | 0.99 |
| Adcyap1  | Adenylate cyclase activating polypeptide 1                                                 | 0.99 |
| Myc      | Myelocytomatosis oncogene                                                                  | 0.99 |
| Txnip    | Thioredoxin interacting protein                                                            | 0.99 |
| Bahd1    | Bromo adjacent homology domain containing 1                                                | 0.99 |
| Med27    | Mediator complex subunit 27                                                                | 0.99 |

|          |                                                                                                                                                                              |      |
|----------|------------------------------------------------------------------------------------------------------------------------------------------------------------------------------|------|
| Abhd2    | Abhydrolase domain containing 2                                                                                                                                              | 0.99 |
| Lypd1    | Ly6/Plaur domain containing 1                                                                                                                                                | 0.99 |
| Rnf166   | Ring finger protein 166                                                                                                                                                      | 0.99 |
| Epha6    | Eph receptor A6                                                                                                                                                              | 0.99 |
| Ppp1r7   | Protein phosphatase 1, regulatory (inhibitor) subunit 7                                                                                                                      | 0.99 |
| Rapgef2  | Rap guanine nucleotide exchange factor (GEF) 2                                                                                                                               | 0.99 |
| Opcml    | Opioid binding protein/cell adhesion molecule-like                                                                                                                           | 0.99 |
| Clic5    | Chloride intracellular channel 5                                                                                                                                             | 0.99 |
| Gng10    | Guanine nucleotide binding protein (G protein), gamma 10                                                                                                                     | 0.98 |
| Usp13    | Ubiquitin specific peptidase 13 (isopeptidase T-3)                                                                                                                           | 0.98 |
| Acyl1    | Aminoacylase 1                                                                                                                                                               | 0.98 |
| Kcni3    | Kv channel interacting protein 3, calsenilin                                                                                                                                 | 0.98 |
| Tut1     | Terminal uridylyl transferase 1, U6 snRNA-specific                                                                                                                           | 0.98 |
| Rbck1    | RanBP-type and C3HC4-type zinc finger containing 1                                                                                                                           | 0.98 |
| Klhl1    | Kelch-like 1 (Drosophila)                                                                                                                                                    | 0.98 |
| Kcnh7    | Potassium voltage-gated channel, subfamily H (eag-related), member 7                                                                                                         | 0.98 |
| Prkcc    | Protein kinase C, gamma                                                                                                                                                      | 0.97 |
| Tmem178  | Transmembrane protein 178                                                                                                                                                    | 0.97 |
| BC068157 | CDNA sequence BC068157                                                                                                                                                       | 0.97 |
| Mysm1    | Myb-like, SWIRM and MPN domains 1                                                                                                                                            | 0.97 |
| Asah3l   | N-acylsphingosine amidohydrolase 3-like                                                                                                                                      | 0.97 |
| Pcdhb13  | Protocadherin beta 13                                                                                                                                                        | 0.97 |
| Ythdc2   | YTH domain containing 2                                                                                                                                                      | 0.97 |
| Mllt1    | Myeloid/lymphoid or mixed lineage-leukemia translocation to 1 homolog<br>(Drosophila)                                                                                        | 0.97 |
| Adat2    | Adenosine deaminase, tRNA-specific 2, TAD2 homolog (S. cerevisiae)<br>Transcribed locus, moderately similar to XP_001106577.1 similar to<br>gene model 608, [Macaca mulatta] | 0.97 |
| Nsg2     | Neuron specific gene family member 2                                                                                                                                         | 0.96 |

|           |                                                                                                |      |
|-----------|------------------------------------------------------------------------------------------------|------|
| Ppp2r2c   | Protein phosphatase 2 (formerly 2A), regulatory subunit B (PR 52),<br>gamma isoform            | 0.96 |
| Dmtf1     | Cyclin D binding myb-like transcription factor 1                                               | 0.96 |
| Tbc1d20   | TBC1 domain family, member 20                                                                  | 0.96 |
| Zfp503    | Zinc finger protein 503                                                                        | 0.96 |
| LOC622469 | Similar to SRp40-1                                                                             | 0.96 |
| Sertad1   | SERTA domain containing 1                                                                      | 0.96 |
| Gnao1     | Guanine nucleotide binding protein, alpha o                                                    | 0.96 |
| Ranbp17   | RAN binding protein 17                                                                         | 0.96 |
| Dusp5     | Dual specificity phosphatase 5                                                                 | 0.96 |
| Wdr13     | WD repeat domain 13                                                                            | 0.96 |
| Scn2a1    | Sodium channel, voltage-gated, type II, alpha 1                                                | 0.96 |
| Camta2    | Calmodulin binding transcription activator 2                                                   | 0.96 |
| LanC1     | LanC (bacterial lantibiotic synthetase component C)-like 1                                     | 0.96 |
| Mcf2l     | Mcf.2 transforming sequence-like                                                               | 0.95 |
| Stra6     | Stimulated by retinoic acid gene 6                                                             | 0.95 |
| Pdpk1     | 3-phosphoinositide dependent protein kinase-1                                                  | 0.95 |
| Abl2      | V-abl Abelson murine leukemia viral oncogene 2 (arg, Abelson-related<br>gene)                  | 0.95 |
| Mpp2      | Membrane protein, palmitoylated 2 (MAGUK p55 subfamily member 2)                               | 0.95 |
| Lhx6      | LIM homeobox protein 6                                                                         | 0.95 |
| Hpd1      | 4-hydroxyphenylpyruvate dioxygenase-like                                                       | 0.95 |
| Yrdc      | YrdC domain containing (E.coli)                                                                | 0.95 |
| Agpat7    | 1-acylglycerol-3-phosphate O-acyltransferase 7 (lysophosphatidic acid<br>acyltransferase, eta) | 0.95 |
| Ngb       | Neuroglobin                                                                                    | 0.95 |
| Mettl8    | Methyltransferase like 8                                                                       | 0.95 |
| Stim1     | Stromal interaction molecule 1                                                                 | 0.95 |
| Ebf3      | Early B-cell factor 3                                                                          | 0.95 |

|          |                                                              |      |
|----------|--------------------------------------------------------------|------|
| Rasgef1b | RasGEF domain family, member 1B                              | 0.95 |
| Atf7ip   | Activating transcription factor 7 interacting protein        | 0.95 |
| Mark1    | MAP/microtubule affinity-regulating kinase 1                 | 0.95 |
| Tpm1     | Tropomyosin 1, alpha                                         | 0.95 |
| Zfp112   | Zinc finger protein 112                                      | 0.95 |
| Lingo2   | Leucine rich repeat and Ig domain containing 2               | 0.94 |
| Itgav    | Integrin alpha V                                             | 0.94 |
| BC002230 | CDNA sequence BC002230                                       | 0.94 |
| Irak2    | Interleukin-1 receptor-associated kinase 2                   | 0.94 |
| Gprin1   | G protein-regulated inducer of neurite outgrowth 1           | 0.94 |
| Mfsd4    | Major facilitator superfamily domain containing 4            | 0.94 |
| Dpy1913  | Dpy-19-like 3 (C. elegans)                                   | 0.94 |
| Nudt10   | Nudix (nucleoside diphosphate linked moiety X)-type motif 10 | 0.94 |
| Mylk     | Myosin, light polypeptide kinase                             | 0.94 |
| Spnb1    | Spectrin beta 1                                              | 0.94 |
| Egln3    | EGL nine homolog 3 (C. elegans)                              | 0.94 |
| Ttl      | Tubulin tyrosine ligase                                      | 0.94 |
| Dnajc13  | DnaJ (Hsp40) homolog, subfamily C, member 13                 | 0.93 |
| Clstn2   | Calsyntenin 2                                                | 0.93 |
| Sh3rf1   | SH3 domain containing ring finger 1                          | 0.93 |
| Slk      | STE20-like kinase (yeast)                                    | 0.93 |
| Tspan7   | Tetraspanin 7                                                | 0.93 |
| Foxk2    | Forkhead box K2                                              | 0.93 |
| Macro2   | MACRO domain containing 2                                    | 0.93 |
| Ubox5    | U box domain containing 5                                    | 0.93 |
| Svop     | SV2 related protein                                          | 0.93 |
| Ldha     | Lactate dehydrogenase A                                      | 0.93 |
| Clcn1    | Chloride channel 1                                           | 0.93 |
| Epb4.111 | Erythrocyte protein band 4.1-like 1                          | 0.93 |
| Jakmip1  | Janus kinase and microtubule interacting protein 1           | 0.93 |

|          |                                                                                                                                                     |      |
|----------|-----------------------------------------------------------------------------------------------------------------------------------------------------|------|
| Nat14    | N-acetyltransferase 14                                                                                                                              | 0.92 |
| BC067047 | CDNA sequence BC067047                                                                                                                              | 0.92 |
| Nrip1    | Nuclear receptor interacting protein 1                                                                                                              | 0.92 |
| Dlg2     | Discs, large homolog 2 (Drosophila)                                                                                                                 | 0.92 |
| Gm129    | Gene model 129, (NCBI)                                                                                                                              | 0.92 |
| Zc3h12b  | Zinc finger CCCH-type containing 12B                                                                                                                | 0.92 |
| BC011426 | CDNA sequence BC011426                                                                                                                              | 0.92 |
| Chgb     | Chromogranin B                                                                                                                                      | 0.92 |
| Slc25a23 | Solute carrier family 25 (mitochondrial carrier; phosphate carrier),<br>member 23                                                                   | 0.91 |
| Glmn     | Glomulin, FKBP associated protein                                                                                                                   | 0.91 |
|          | Transcribed locus, strongly similar to NP_065390.1 factor of kappa<br>light polypeptide gene enhancer in B-cells inhibitor, alpha [Homo<br>sapiens] | 0.91 |
| Xrn2     | 5'-3' exoribonuclease 2                                                                                                                             | 0.91 |
| Tmem74   | Transmembrane protein 74                                                                                                                            | 0.91 |
| Phactr3  | Phosphatase and actin regulator 3                                                                                                                   | 0.91 |
| Kifc2    | Kinesin family member C2                                                                                                                            | 0.91 |
| Obfc1    | Oligonucleotide/oligosaccharide-binding fold containing 1                                                                                           | 0.91 |
| Mbd5     | Methyl-CpG binding domain protein 5                                                                                                                 | 0.91 |
| Lin7a    | Lin-7 homolog A (C. elegans)                                                                                                                        | 0.91 |
| Lipt1    | Lipoyltransferase 1                                                                                                                                 | 0.91 |
| Pdzk1    | PDZ domain containing 1                                                                                                                             | 0.91 |
| Leng8    | Leukocyte receptor cluster (LRC) member 8                                                                                                           | 0.91 |
| Sema3f   | Sema domain, immunoglobulin domain (Ig), short basic domain,<br>secreted, (semaphorin) 3F                                                           | 0.91 |
| Stox1    | Storkhead box 1                                                                                                                                     | 0.91 |
| Cd68     | CD68 antigen                                                                                                                                        | 0.90 |
| AW551984 | Expressed sequence AW551984                                                                                                                         | 0.90 |

|          |                                                                  |      |
|----------|------------------------------------------------------------------|------|
| Xpnpep3  | X-prolyl aminopeptidase (aminopeptidase P) 3, putative           | 0.90 |
| Cntnap5a | Contactin associated protein-like 5A                             | 0.90 |
| Bbs2     | Bardet-Biedl syndrome 2 homolog (human)                          | 0.90 |
| Socs7    | Suppressor of cytokine signaling 7                               | 0.90 |
| Kcnk4    | Potassium channel, subfamily K, member 4                         | 0.90 |
| Ptprj    | Protein tyrosine phosphatase, receptor type, J                   | 0.90 |
| Pcdhb2   | Protocadherin beta 2                                             | 0.90 |
| Pcdh1    | Protocadherin 1                                                  | 0.90 |
| Drd5     | Dopamine receptor 5                                              | 0.90 |
| Xpo6     | Exportin 6                                                       | 0.90 |
| Ppapdc2  | Phosphatidic acid phosphatase type 2 domain containing 2         | 0.89 |
| Tnks1bp1 | Tankyrase 1 binding protein 1                                    | 0.89 |
| Rara     | Retinoic acid receptor, alpha                                    | 0.89 |
| Mrc2     | Mannose receptor, C type 2                                       | 0.89 |
| Gpr39    | G protein-coupled receptor 39                                    | 0.89 |
| Eya4     | Eyes absent 4 homolog (Drosophila)                               | 0.89 |
| Syt14    | Synaptotagmin-like 4                                             | 0.89 |
| Nip7     | Nuclear import 7 homolog (S. cerevisiae)                         | 0.89 |
| Dyrk2    | Dual-specificity tyrosine-(Y)-phosphorylation regulated kinase 2 | 0.89 |
| BC018242 | CDNA sequence BC018242                                           | 0.89 |
| Dapk1    | Death associated protein kinase 1                                | 0.89 |
| Pgbd5    | PiggyBac transposable element derived 5                          | 0.89 |
| Gm71     | Gene model 71, (NCBI)                                            | 0.89 |
| Foxk1    | Forkhead box K1                                                  | 0.89 |
| Pars2    | Prolyl-tRNA synthetase (mitochondrial)(putative)                 | 0.88 |
| Jmjd2b   | Jumonji domain containing 2B                                     | 0.88 |
| Nckap1l  | NCK associated protein 1 like                                    | 0.88 |
| Smap1l   | Stromal membrane-associated protein 1-like                       | 0.88 |
| Thsd7b   | Thrombospondin, type I, domain containing 7B                     | 0.88 |
| Map2k6   | Mitogen activated protein kinase kinase 6                        | 0.88 |

|           |                                                                                                                                                            |      |
|-----------|------------------------------------------------------------------------------------------------------------------------------------------------------------|------|
| Gucy1a3   | Guanylate cyclase 1, soluble, alpha 3                                                                                                                      | 0.88 |
| Npy2r     | Neuropeptide Y receptor Y2                                                                                                                                 | 0.88 |
| Pex26     | Peroxisome biogenesis factor 26                                                                                                                            | 0.88 |
| Cnih2     | Cornichon homolog 2 (Drosophila)                                                                                                                           | 0.88 |
| Sfrs6     | Splicing factor, arginine/serine-rich 6                                                                                                                    | 0.88 |
| Ash1      | Ash1 (absent, small, or homeotic)-like (Drosophila)                                                                                                        | 0.88 |
| Mizf      | MBD2-interacting zinc finger                                                                                                                               | 0.88 |
| D5Ert579e | DNA segment, Chr 5, ERATO Doi 579, expressed                                                                                                               | 0.88 |
| Lsm14b    | LSM14 homolog B (SCD6, <i>S. cerevisiae</i> )                                                                                                              | 0.88 |
|           | Transcribed locus, moderately similar to XP_001100100.1 similar to<br>membrane protein, palmitoylated 4 isoform 2 [ <i>Macaca mulatta</i> ]                | 0.88 |
| Zfp704    | Zinc finger protein 704                                                                                                                                    | 0.87 |
| Tspan5    | Tetraspanin 5                                                                                                                                              | 0.87 |
| Rab3d     | RAB3D, member RAS oncogene family                                                                                                                          | 0.87 |
|           | Transcribed locus, moderately similar to XP_001111995.1 similar to<br>family with sequence similarity 76, member A isoform 5 [ <i>Macaca<br/>mulatta</i> ] | 0.87 |
| Cst6      | Cystatin E/M                                                                                                                                               | 0.87 |
| Fgfr1op2  | FGFR1 oncogene partner 2                                                                                                                                   | 0.87 |
| Dcx       | Doublecortin                                                                                                                                               | 0.87 |
| Rin3      | Ras and Rab interactor 3                                                                                                                                   | 0.87 |
| Ap1s1     | Adaptor protein complex AP-1, sigma 1                                                                                                                      | 0.87 |
| Mtap2     | Microtubule-associated protein 2                                                                                                                           | 0.87 |
| Bag5      | BCL2-associated athanogene 5                                                                                                                               | 0.87 |
| Spsb1     | SplA/ryanodine receptor domain and SOCS box containing 1                                                                                                   | 0.87 |
| Abcc9     | ATP-binding cassette, sub-family C (CFTR/MRP), member 9                                                                                                    | 0.87 |
| Atrnl1    | Attractin like 1                                                                                                                                           | 0.87 |
| Pdzd2     | PDZ domain containing 2                                                                                                                                    | 0.86 |
| Arrdc2    | Arrestin domain containing 2                                                                                                                               | 0.86 |



|          |                                                                                                  |      |
|----------|--------------------------------------------------------------------------------------------------|------|
| Inoc1    | INO80 complex homolog 1 ( <i>S. cerevisiae</i> )                                                 | 0.86 |
| Olfm2    | Olfactomedin 2                                                                                   | 0.86 |
| Usp12    | Ubiquitin specific peptidase 12                                                                  | 0.86 |
| Myh10    | Myosin, heavy polypeptide 10, non-muscle                                                         | 0.86 |
| Pcdhb19  | Protocadherin beta 19                                                                            | 0.86 |
| Sort1    | Sortilin 1                                                                                       | 0.86 |
| Scn3a    | Sodium channel, voltage-gated, type III, alpha                                                   | 0.86 |
| Plec1    | Plectin 1                                                                                        | 0.86 |
| Nfkb2    | Nuclear factor of kappa light polypeptide gene enhancer in B-cells 2,<br>p49/p100                | 0.86 |
| Esam1    | Endothelial cell-specific adhesion molecule                                                      | 0.86 |
| Sfxn3    | Sideroflexin 3                                                                                   | 0.85 |
| Nrn1     | Neuritin 1                                                                                       | 0.85 |
| BC025920 | CDNA sequence BC025920                                                                           | 0.85 |
| Nptn     | Neuroplastin                                                                                     | 0.85 |
| Asphd1   | Aspartate beta-hydroxylase domain containing 1                                                   | 0.85 |
| Larp7    | La ribonucleoprotein domain family, member 7                                                     | 0.85 |
| Rtn4r    | Reticulon 4 receptor                                                                             | 0.85 |
| Ank3     | Ankyrin 3, epithelial                                                                            | 0.85 |
| Nfate2ip | Nuclear factor of activated T-cells, cytoplasmic, calcineurin-dependent 2<br>interacting protein | 0.85 |
| Pfkfb3   | 6-phosphofructo-2-kinase/fructose-2,6-biphosphatase 3                                            | 0.85 |
| Mapk14   | Mitogen activated protein kinase 14                                                              | 0.85 |
| Vrk1     | Vaccinia related kinase 1                                                                        | 0.85 |
| Adamts1  | A disintegrin-like and metallopeptidase (reprolysin type) with<br>thrombospondin type 1 motif, 1 | 0.84 |
| Rnf44    | Ring finger protein 44                                                                           | 0.84 |
| Ece1     | Endothelin converting enzyme 1                                                                   | 0.84 |
| Gtf2h1   | General transcription factor II H, polypeptide 1                                                 | 0.84 |

|            |                                                                      |      |
|------------|----------------------------------------------------------------------|------|
|            | Transcribed locus, strongly similar to XP_516836.2 cyclin L1 isoform |      |
|            | 6 [Pan troglodytes]                                                  | 0.84 |
| Prkci      | Protein kinase C, iota                                               | 0.84 |
| Dclre1a    | DNA cross-link repair 1A, PSO2 homolog ( <i>S. cerevisiae</i> )      | 0.84 |
| Slc22a8    | Solute carrier family 22 (organic anion transporter), member 8       | 0.84 |
|            | Transcribed locus, moderately similar to XP_001055368.1 similar to   |      |
|            | nuclear RNA export factor 2 [ <i>Rattus norvegicus</i> ]             | 0.84 |
| Ajap1      | Adherens junction associated protein 1                               | 0.84 |
| AA536749   | Expressed sequence AA536749                                          | 0.84 |
| Pogz       | Pogo transposable element with ZNF domain                            | 0.84 |
| D18Ert653e | DNA segment, Chr 18, ERATO Doi 653, expressed                        | 0.84 |
| Accn2      | Amiloride-sensitive cation channel 2, neuronal                       | 0.84 |
| Htr5a      | 5-hydroxytryptamine (serotonin) receptor 5A                          | 0.84 |
| Ikzf1      | IKAROS family zinc finger 1                                          | 0.83 |
| BC025575   | CDNA sequence BC025575                                               | 0.83 |
| Pip4k2b    | Phosphatidylinositol-5-phosphate 4-kinase, type II, beta             | 0.83 |
| Pcsk2      | Proprotein convertase subtilisin/kexin type 2                        | 0.83 |
| Sgip1      | SH3-domain GRB2-like (endophilin) interacting protein 1              | 0.83 |
| Zmiz1      | Zinc finger, MIZ-type containing 1                                   | 0.83 |
| Akap6      | A kinase (PRKA) anchor protein 6                                     | 0.83 |
| Gabrq      | Gamma-aminobutyric acid (GABA-A) receptor, subunit theta             | 0.83 |
| Cyp46a1    | Cytochrome P450, family 46, subfamily a, polypeptide 1               | 0.83 |
| Sdccag3    | Serologically defined colon cancer antigen 3                         | 0.83 |
| Zfp661     | Zinc finger protein 661                                              | 0.83 |
| Epb4.1     | Erythrocyte protein band 4.1                                         | 0.83 |
| Zfp180     | Zinc finger protein 180                                              | 0.83 |
| Smad4      | MAD homolog 4 ( <i>Drosophila</i> )                                  | 0.82 |
| Tceal6     | Transcription elongation factor A (SII)-like 6                       | 0.82 |
| P2ry14     | Purinergic receptor P2Y, G-protein coupled, 14                       | 0.82 |

| Avian musculoaponeurotic fibrosarcoma (v-maf) AS42 oncogene |                                                                    |      |
|-------------------------------------------------------------|--------------------------------------------------------------------|------|
| Maf                                                         | homolog                                                            | 0.82 |
| Tfb2m                                                       | Transcription factor B2, mitochondrial                             | 0.82 |
| Tbc1d23                                                     | TBC1 domain family, member 23                                      | 0.82 |
| Inpp4a                                                      | Inositol polyphosphate-4-phosphatase, type I                       | 0.82 |
| Znf512b                                                     | Zinc finger protein 512B                                           | 0.82 |
| Pgm5                                                        | Phosphoglucomutase 5                                               | 0.82 |
| Scn3b                                                       | Sodium channel, voltage-gated, type III, beta                      | 0.82 |
| Fzd2                                                        | Frizzled homolog 2 (Drosophila)                                    | 0.82 |
| Cacla1i                                                     | Calcium channel, voltage-dependent, alpha 1I subunit               | 0.82 |
| Atkbd4                                                      | ATP binding domain 4                                               | 0.82 |
| Scn8a                                                       | Sodium channel, voltage-gated, type VIII, alpha                    | 0.82 |
| Gpc4                                                        | Glypican 4                                                         | 0.82 |
| Spg21                                                       | Spastic paraplegia 21 homolog (human)                              | 0.82 |
| Mat2b                                                       | Methionine adenosyltransferase II, beta                            | 0.82 |
| Mtfmt                                                       | Mitochondrial methionyl-tRNA formyltransferase                     | 0.81 |
| Zc3h11a                                                     | Zinc finger CCCH type containing 11A                               | 0.81 |
| Schip1                                                      | Schwannomin interacting protein 1                                  | 0.81 |
| Smyd3                                                       | SET and MYND domain containing 3                                   | 0.81 |
| Sorts3                                                      | Sortilin-related VPS10 domain containing receptor 3                | 0.81 |
| Nanos1                                                      | Nanos homolog 1 (Drosophila)                                       | 0.81 |
| Brwd1                                                       | Bromodomain and WD repeat domain containing 1                      | 0.81 |
| Wisp1                                                       | WNT1 inducible signaling pathway protein 1                         | 0.81 |
| Srm2                                                        | Serine/arginine repetitive matrix 2                                | 0.81 |
| Gpr22                                                       | G protein-coupled receptor 22                                      | 0.81 |
|                                                             | Transcribed locus, moderately similar to XP_001053534.1 similar to |      |
|                                                             | Bex4 protein [Rattus norvegicus]                                   | 0.81 |
| Ehbp111                                                     | EH domain binding protein 1-like 1                                 | 0.81 |
| Cdh11                                                       | Cadherin 11                                                        | 0.81 |
| Lmbrd2                                                      | LMBR1 domain containing 2                                          | 0.81 |

|          |                                                                                                                                  |      |
|----------|----------------------------------------------------------------------------------------------------------------------------------|------|
| Dgat2    | Diacylglycerol O-acyltransferase 2                                                                                               | 0.80 |
| Arhgef4  | Rho guanine nucleotide exchange factor (GEF) 4                                                                                   | 0.80 |
| Sirpa    | Signal-regulatory protein alpha                                                                                                  | 0.80 |
| Arl4a    | ADP-ribosylation factor-like 4A                                                                                                  | 0.80 |
| Grid1    | Glutamate receptor, ionotropic, delta 1                                                                                          | 0.80 |
| Slc25a16 | Solute carrier family 25 (mitochondrial carrier, Graves disease autoantigen), member 16                                          | 0.80 |
| Gm996    | Gene model 996, (NCBI)                                                                                                           | 0.80 |
| Atxn3    | Ataxin 3                                                                                                                         | 0.80 |
| Ccny     | Cyclin Y                                                                                                                         | 0.80 |
| Ncoa1    | Nuclear receptor coactivator 1                                                                                                   | 0.80 |
| Galnt13  | UDP-N-acetyl-alpha-D-galactosamine:polypeptide N-acetylgalactosaminyltransferase 13                                              | 0.80 |
| Ncoa6    | Nuclear receptor coactivator 6                                                                                                   | 0.80 |
| Bbx      | Bobby sox homolog (Drosophila)                                                                                                   | 0.80 |
| Arcp2    | Actin related protein 2/3 complex, subunit 2                                                                                     | 0.79 |
| Tigd3    | Tigger transposable element derived 3                                                                                            | 0.79 |
| Ubqln4   | Ubiquilin 4                                                                                                                      | 0.79 |
| Pcnx12   | Pecanex-like 2 (Drosophila)                                                                                                      | 0.79 |
| Prima1   | Proline rich membrane anchor 1                                                                                                   | 0.79 |
| Pak6     | P21 (CDKN1A)-activated kinase 6                                                                                                  | 0.79 |
| Crcp     | Calcitonin gene-related peptide-receptor component protein                                                                       | 0.79 |
| Neto2    | Neuropilin (NRP) and tolloid (TLL)-like 2                                                                                        | 0.79 |
|          | 9 days embryo whole body cDNA, RIKEN full-length enriched library, clone:D030065H24 product:unclassifiable, full insert sequence | 0.79 |
| Cblb     | Casitas B-lineage lymphoma b                                                                                                     | 0.79 |
| Ctsk     | Cathepsin K                                                                                                                      | 0.79 |
| Rtn1     | Reticulon 1                                                                                                                      | 0.79 |
| Wsb2     | WD repeat and SOCS box-containing 2                                                                                              | 0.79 |

|          |                                                                                                                                       |      |
|----------|---------------------------------------------------------------------------------------------------------------------------------------|------|
| Setbp1   | SET binding protein 1                                                                                                                 | 0.79 |
| Ids      | Iduronate 2-sulfatase                                                                                                                 | 0.79 |
| Cacng4   | Calcium channel, voltage-dependent, gamma subunit 4                                                                                   | 0.79 |
| Fn1      | Fibronectin 1                                                                                                                         | 0.79 |
| Zcchc6   | Zinc finger, CCHC domain containing 6                                                                                                 | 0.79 |
| Pgr      | Progesterone receptor                                                                                                                 | 0.78 |
| Taf1b    | TATA box binding protein (Tbp)-associated factor, RNA polymerase I, B                                                                 | 0.78 |
| Vgf      | VEGF nerve growth factor inducible                                                                                                    | 0.78 |
| Dbr1     | Debranching enzyme homolog 1 ( <i>S. cerevisiae</i> )                                                                                 | 0.78 |
| Slc16a11 | Solute carrier family 16 (monocarboxylic acid transporters), member 11                                                                | 0.78 |
| Adcy1    | Adenylate cyclase 1                                                                                                                   | 0.78 |
| Birc6    | Baculoviral IAP repeat-containing 6                                                                                                   | 0.78 |
| Nrcam    | Neuron-glia-CAM-related cell adhesion molecule                                                                                        | 0.78 |
| Zfp446   | Zinc finger protein 446                                                                                                               | 0.78 |
| Arnt     | Aryl hydrocarbon receptor nuclear translocator                                                                                        | 0.78 |
| Map3k5   | Mitogen activated protein kinase kinase kinase 5                                                                                      | 0.78 |
| Gnaz     | Guanine nucleotide binding protein, alpha z subunit                                                                                   | 0.78 |
| Zmym3    | Zinc finger, MYM-type 3                                                                                                               | 0.78 |
|          | Transcribed locus, weakly similar to XP_001110352.1 calcium channel,<br>voltage-dependent, alpha 1E subunit [ <i>Macaca mulatta</i> ] | 0.78 |
| Mfge8    | Milk fat globule-EGF factor 8 protein                                                                                                 | 0.78 |
| Lin7b    | Lin-7 homolog B ( <i>C. elegans</i> )                                                                                                 | 0.78 |
| Cdkl2    | Cyclin-dependent kinase-like 2 (CDC2-related kinase)                                                                                  | 0.77 |
| Actr3    | ARP3 actin-related protein 3 homolog (yeast)                                                                                          | 0.77 |
| Spred2   | Sprouty-related, EVH1 domain containing 2                                                                                             | 0.77 |
| Trpc5    | Transient receptor potential cation channel, subfamily C, member 5                                                                    | 0.77 |
| Ppil4    | Peptidylprolyl isomerase (cyclophilin)-like 4                                                                                         | 0.77 |
| Kcna3    | Potassium voltage-gated channel, shaker-related subfamily, member 3                                                                   | 0.77 |
| Ywhaz    | Tyrosine 3-monooxygenase/tryptophan 5-monooxygenase activation<br>protein, zeta polypeptide                                           | 0.77 |

|          |                                                                                                                  |      |
|----------|------------------------------------------------------------------------------------------------------------------|------|
| Khdrbs3  | KH domain containing, RNA binding, signal transduction associated 3                                              | 0.77 |
| BC007180 | CDNA sequence BC007180                                                                                           | 0.77 |
| Pan3     | PAN3 polyA specific ribonuclease subunit homolog ( <i>S. cerevisiae</i> )                                        | 0.77 |
| Slc4a10  | Solute carrier family 4, sodium bicarbonate cotransporter-like, member<br>10                                     | 0.77 |
| BC016423 | CDNA sequence BC016423                                                                                           | 0.77 |
| Il6ra    | Interleukin 6 receptor, alpha                                                                                    | 0.77 |
| Tbc1d22a | TBC1 domain family, member 22a                                                                                   | 0.77 |
| Ankrd12  | Ankyrin repeat domain 12                                                                                         | 0.77 |
| Slc7a14  | Solute carrier family 7 (cationic amino acid transporter, y+ system),<br>member 14                               | 0.77 |
|          | Transcribed locus, strongly similar to NP_067544.1 receptor 1 isoform<br>NR1-2 precursor [ <i>Homo sapiens</i> ] | 0.77 |
| Ptcd1    | Pentatricopeptide repeat domain 1                                                                                | 0.77 |
| Tcf3     | Transcription factor 3                                                                                           | 0.77 |
| Ccdc130  | Coiled-coil domain containing 130                                                                                | 0.77 |
| Tyw3     | TRNA-yW synthesizing protein 3 homolog ( <i>S. cerevisiae</i> )                                                  | 0.77 |
| Zbtb34   | Zinc finger and BTB domain containing 34                                                                         | 0.77 |
| Srpx     | Sushi-repeat-containing protein                                                                                  | 0.77 |
| Ppp1r9b  | Protein phosphatase 1, regulatory subunit 9B                                                                     | 0.77 |
| Dnalc4   | Dynein, axonemal, light chain 4                                                                                  | 0.77 |
| Topbp1   | Topoisomerase (DNA) II beta binding protein                                                                      | 0.77 |
| Gpr150   | G protein-coupled receptor 150                                                                                   | 0.76 |
| Gemin8   | Gem (nuclear organelle) associated protein 8                                                                     | 0.76 |
| Reep6    | Receptor accessory protein 6                                                                                     | 0.76 |
| Tbc1d8b  | TBC1 domain family, member 8B                                                                                    | 0.76 |
| Usp2     | Ubiquitin specific peptidase 2                                                                                   | 0.76 |
| Dennd3   | DENN/MADD domain containing 3                                                                                    | 0.76 |
| Lrrc20   | Leucine rich repeat containing 20                                                                                | 0.76 |

|           |                                                                                     |      |
|-----------|-------------------------------------------------------------------------------------|------|
| Zscan18   | Zinc finger and SCAN domain containing 18                                           | 0.76 |
| Arl6ip2   | ADP-ribosylation factor-like 6 interacting protein 2                                | 0.76 |
| Kctd16    | Potassium channel tetramerisation domain containing 16                              | 0.76 |
| Fert2     | Fer (fms/fps related) protein kinase, testis specific 2                             | 0.76 |
| Thsd4     | Thrombospondin, type I, domain containing 4                                         | 0.76 |
| Evc2      | Ellis van Creveld syndrome 2 homolog (human)                                        | 0.76 |
| Olfml2a   | Olfactomedin-like 2A                                                                | 0.76 |
| Chka      | Choline kinase alpha                                                                | 0.76 |
| Man2a2    | Mannosidase 2, alpha 2                                                              | 0.76 |
| Jhdm1d    | Jumonji C domain-containing histone demethylase 1 homolog D (S. cerevisiae)         | 0.76 |
| Ccm2      | Cerebral cavernous malformation 2 homolog (human)                                   | 0.76 |
| Basp1     | Brain abundant, membrane attached signal protein 1                                  | 0.76 |
| Ift57     | Intraflagellar transport 57 homolog (Chlamydomonas)                                 | 0.75 |
| Sntg1     | Syntrophin, gamma 1                                                                 | 0.75 |
| Braf      | Braf transforming gene                                                              | 0.75 |
| Rnf157    | Ring finger protein 157                                                             | 0.75 |
| D1Ert622e | DNA segment, Chr 1, ERATO Doi 622, expressed                                        | 0.75 |
| Pcgf3     | Polycomb group ring finger 3                                                        | 0.75 |
| Ddef1     | Development and differentiation enhancing                                           | 0.75 |
| Arhgap1   | Rho GTPase activating protein 1                                                     | 0.75 |
| Smndc1    | Survival motor neuron domain containing 1                                           | 0.75 |
| Zdhhc8    | Zinc finger, DHHC domain containing 8                                               | 0.75 |
| Itsn2     | Intersectin 2                                                                       | 0.75 |
| Spin1     | Spindlin 1                                                                          | 0.75 |
| Spock3    | Sparc/osteonectin, cwcv and kazal-like domains proteoglycan 3                       | 0.75 |
| C1galt1   | Core 1 synthase, glycoprotein-N-acetylgalactosamine 3-beta-galactosyltransferase, 1 | 0.75 |
| Pitpnb    | Phosphatidylinositol transfer protein, beta                                         | 0.75 |

|          |                                                                                      |      |
|----------|--------------------------------------------------------------------------------------|------|
| Dusp7    | Dual specificity phosphatase 7                                                       | 0.75 |
| Flot2    | Flotillin 2                                                                          | 0.74 |
| Tnfrsf19 | Tumor necrosis factor receptor superfamily, member 19                                | 0.74 |
| Bdp1     | B double prime 1, subunit of RNA polymerase III transcription initiation factor IIIB | 0.74 |
| Adam22   | A disintegrin and metallopeptidase domain 22                                         | 0.74 |
| Wfs1     | Wolfram syndrome 1 homolog (human)                                                   | 0.74 |
| St3gal5  | ST3 beta-galactoside alpha-2,3-sialyltransferase 5                                   | 0.74 |
| Qsox2    | Quiescin Q6 sulfhydryl oxidase 2                                                     | 0.74 |
| Hmbs     | Hydroxymethylbilane synthase                                                         | 0.74 |
| Gramd2   | GRAM domain containing 2                                                             | 0.74 |
| Coro7    | Coronin 7                                                                            | 0.74 |
| Mina     | Myc induced nuclear antigen                                                          | 0.74 |
| Dbpht2   | DNA binding protein with his-thr domain                                              | 0.74 |
| Abcd2    | ATP-binding cassette, sub-family D (ALD), member 2                                   | 0.74 |
| Kcna1    | Potassium voltage-gated channel, shaker-related subfamily, member 1                  | 0.74 |
| Net1     | Neuroepithelial cell transforming gene 1                                             | 0.74 |
| Akap11   | A kinase (PRKA) anchor protein 11                                                    | 0.74 |
| Fbxo34   | F-box protein 34                                                                     | 0.74 |
| Etv6     | Ets variant gene 6 (TEL oncogene)                                                    | 0.74 |
| Gnb11    | Guanine nucleotide binding protein (G protein), beta polypeptide 1-like              | 0.74 |
| BC021381 | CDNA sequence BC021381                                                               | 0.74 |
| Hnrpdl   | Heterogeneous nuclear ribonucleoprotein D-like                                       | 0.73 |
| Dclre1c  | DNA cross-link repair 1C, PSO2 homolog (S. cerevisiae)                               | 0.73 |
| Ncam2    | Neural cell adhesion molecule 2                                                      | 0.73 |
| Kcna4    | Potassium voltage-gated channel, shaker-related subfamily, member 4                  | 0.73 |
| Slc1a2   | Solute carrier family 1 (glial high affinity glutamate transporter), member 2        | 0.73 |
| Rybp     | RING1 and YY1 binding protein                                                        | 0.73 |
| Rab27b   | RAB27b, member RAS oncogene family                                                   | 0.73 |



|          |                                                                                                                                |      |
|----------|--------------------------------------------------------------------------------------------------------------------------------|------|
| Add1     | Adducin 1 (alpha)                                                                                                              | 0.73 |
| Slc6a13  | Solute carrier family 6 (neurotransmitter transporter, GABA), member 13                                                        | 0.73 |
|          | Transcribed locus, moderately similar to XP_001113453.1 similar to                                                             |      |
|          | tropomyosin 3, gamma isoform 14 [Macaca mulatta]                                                                               | 0.73 |
| Adam23   | A disintegrin and metallopeptidase domain 23                                                                                   | 0.73 |
| Cd44     | CD44 antigen                                                                                                                   | 0.73 |
| Mex3a    | Mex3 homolog A (C. elegans)                                                                                                    | 0.73 |
| Ankrd13b | Ankyrin repeat domain 13b                                                                                                      | 0.73 |
| Rev1     | REV1 homolog (S. cerevisiae)                                                                                                   | 0.73 |
| Sgsm2    | Small G protein signaling modulator 2                                                                                          | 0.73 |
| Hectd2   | HECT domain containing 2                                                                                                       | 0.73 |
| Hmgcs2   | 3-hydroxy-3-methylglutaryl-Coenzyme A synthase 2                                                                               | 0.73 |
| Zfp382   | Zinc finger protein 382                                                                                                        | 0.73 |
| Kpna1    | Karyopherin (importin) alpha 1                                                                                                 | 0.73 |
| BC020002 | CDNA sequence BC020002                                                                                                         | 0.73 |
| Usp7     | Ubiquitin specific peptidase 7                                                                                                 | 0.72 |
| Kcnd1    | Potassium voltage-gated channel, Shal-related family, member 1                                                                 | 0.72 |
| Tomm34   | Translocase of outer mitochondrial membrane 34                                                                                 | 0.72 |
|          | 15 days embryo head cDNA, RIKEN full-length enriched library,<br>clone:D930025C07 product:unclassifiable, full insert sequence | 0.72 |
| Sdccag8  | Serologically defined colon cancer antigen 8                                                                                   | 0.72 |
| Zfp3     | Zinc finger protein 3                                                                                                          | 0.72 |
| Pten     | Phosphatase and tensin homolog                                                                                                 | 0.72 |
| Zfp580   | Zinc finger protein 580                                                                                                        | 0.72 |
| Zbed3    | Zinc finger, BED domain containing 3                                                                                           | 0.72 |
| Slc30a4  | Solute carrier family 30 (zinc transporter), member 4                                                                          | 0.72 |
| Dopey2   | Dopey family member 2                                                                                                          | 0.72 |
| Zgpat    | Zinc finger, CCCH-type with G patch domain                                                                                     | 0.72 |
| Ttbk1    | Tau tubulin kinase 1                                                                                                           | 0.72 |

|         |                                                                                                                                                                                                                                                                         |      |
|---------|-------------------------------------------------------------------------------------------------------------------------------------------------------------------------------------------------------------------------------------------------------------------------|------|
| Cntnap4 | Contactin associated protein-like 4                                                                                                                                                                                                                                     | 0.72 |
| Fig4    | FIG4 homolog ( <i>S. cerevisiae</i> )                                                                                                                                                                                                                                   | 0.72 |
| Col4a1  | Collagen, type IV, alpha 1                                                                                                                                                                                                                                              | 0.72 |
| Ddx5    | DEAD (Asp-Glu-Ala-Asp) box polypeptide 5                                                                                                                                                                                                                                | 0.72 |
| Pclo    | Piccolo (presynaptic cytomatrix protein)                                                                                                                                                                                                                                | 0.71 |
| Armc9   | Armadillo repeat containing 9                                                                                                                                                                                                                                           | 0.71 |
| Wdr5    | WD repeat domain 5                                                                                                                                                                                                                                                      | 0.71 |
| Gpm6a   | Glycoprotein m6a                                                                                                                                                                                                                                                        | 0.71 |
| Nol6    | Nucleolar protein family 6 (RNA-associated)                                                                                                                                                                                                                             | 0.71 |
| Rapgef1 | Rap guanine nucleotide exchange factor (GEF) 1                                                                                                                                                                                                                          | 0.71 |
| Ogfrl1  | Opioid growth factor receptor-like 1                                                                                                                                                                                                                                    | 0.71 |
| Map3k10 | Mitogen activated protein kinase kinase kinase 10                                                                                                                                                                                                                       | 0.71 |
| Man2a1  | Mannosidase 2, alpha 1                                                                                                                                                                                                                                                  | 0.71 |
| Vasn    | Vasorin                                                                                                                                                                                                                                                                 | 0.71 |
|         | Transcribed locus, strongly similar to XP_001077020.1 similar to<br>SWI/SNF-related matrix-associated actin-dependent regulator of<br>chromatin subfamily C member 1 (SWI/SNF complex 155 kDa subunit)<br>(BRG1-associated factor 155) (SWI3-related protein) isoform 5 | 0.71 |
|         | Transcribed locus, moderately similar to XP_001095179.1 hypothetical<br>protein isoform 1 [ <i>Macaca mulatta</i> ]                                                                                                                                                     | 0.71 |
| Sufu    | Suppressor of fused homolog ( <i>Drosophila</i> )                                                                                                                                                                                                                       | 0.71 |
| Tshz1   | Teashirt zinc finger family member 1                                                                                                                                                                                                                                    | 0.71 |
| Odz4    | Odd Oz/ten-m homolog 4 ( <i>Drosophila</i> )                                                                                                                                                                                                                            | 0.71 |
| Tagln   | Transgelin                                                                                                                                                                                                                                                              | 0.71 |
| Herc1   | Hect (homologous to the E6-AP (UBE3A) carboxyl terminus) domain<br>and RCC1 (CHC1)-like domain (RLD) 1                                                                                                                                                                  | 0.70 |
| Thg11   | TRNA-histidine guanylyltransferase 1-like ( <i>S. cerevisiae</i> )                                                                                                                                                                                                      | 0.70 |
| Tnks2   | Tankyrase, TRF1-interacting ankyrin-related ADP-ribose polymerase 2                                                                                                                                                                                                     | 0.70 |
| Sp2     | Sp2 transcription factor                                                                                                                                                                                                                                                | 0.70 |

|          |                                                                                                                                             |      |
|----------|---------------------------------------------------------------------------------------------------------------------------------------------|------|
| Frat2    | Frequently rearranged in advanced T-cell lymphomas 2                                                                                        | 0.70 |
| Pcdh15   | Protocadherin 15                                                                                                                            | 0.70 |
| Vps33a   | Vacuolar protein sorting 33A (yeast)                                                                                                        | 0.70 |
| Ddx51    | DEAD (Asp-Glu-Ala-Asp) box polypeptide 51                                                                                                   | 0.70 |
| Sema4b   | Sema domain, immunoglobulin domain (Ig), transmembrane domain (TM) and short cytoplasmic domain, (semaphorin) 4B                            | 0.70 |
| Cdc216   | Cell division cycle 2-like 6 (CDK8-like)                                                                                                    | 0.70 |
| Nme7     | Non-metastatic cells 7, protein expressed in                                                                                                | 0.70 |
| Nup62    | Nucleoporin 62                                                                                                                              | 0.70 |
| Calb1    | Calbindin-28K                                                                                                                               | 0.70 |
| Znrf3    | Zinc and ring finger 3                                                                                                                      | 0.69 |
| Rmnd5b   | Required for meiotic nuclear division 5 homolog B ( <i>S. cerevisiae</i> )                                                                  | 0.69 |
| Chst11   | Carbohydrate sulfotransferase 11                                                                                                            | 0.69 |
| Fbxl22   | F-box and leucine-rich repeat protein 22                                                                                                    | 0.69 |
| Col12a1  | Collagen, type XII, alpha 1                                                                                                                 | 0.69 |
| Flrt3    | Fibronectin leucine rich transmembrane protein 3                                                                                            | 0.69 |
| Pcmt2    | Protein-L-isoaspartate (D-aspartate) O-methyltransferase domain containing 2                                                                | 0.69 |
| Mcm3ap   | Minichromosome maintenance deficient 3 ( <i>S. cerevisiae</i> ) associated protein                                                          | 0.69 |
| Ubtf     | Upstream binding transcription factor, RNA polymerase I                                                                                     | 0.69 |
| Als2cr13 | Amyotrophic lateral sclerosis 2 (juvenile) chromosome region, candidate 13 (human)                                                          | 0.69 |
| Arid1a   | AT rich interactive domain 1A (Swi1 like)                                                                                                   | 0.69 |
| Ccnt2    | Cyclin T2                                                                                                                                   | 0.69 |
| Zfp574   | Zinc finger protein 574                                                                                                                     | 0.69 |
| BC039093 | Transcribed locus, moderately similar to XP_001114820.1 NCK adaptor protein 1 isoform 3 [ <i>Macaca mulatta</i> ]<br>CDNA sequence BC039093 | 0.69 |

|           |                                                                                                                                |      |
|-----------|--------------------------------------------------------------------------------------------------------------------------------|------|
| Dscam11   | Down syndrome cell adhesion molecule-like 1                                                                                    | 0.69 |
| Smarca1   | SWI/SNF related, matrix associated, actin dependent regulator of chromatin, subfamily a, member 1                              | 0.69 |
| Pscd2     | Pleckstrin homology, Sec7 and coiled-coil domains 2                                                                            | 0.69 |
| Pde4dip   | Phosphodiesterase 4D interacting protein (myomegalin)                                                                          | 0.69 |
| Zmynd11   | Zinc finger, MYND domain containing 11                                                                                         | 0.69 |
| Lin54     | Lin-54 homolog (C. elegans)                                                                                                    | 0.69 |
| Usp27x    | Ubiquitin specific peptidase 27, X chromosome                                                                                  | 0.69 |
| LOC434156 | Similar to EID-2-like inhibitor of differentiation-3                                                                           | 0.69 |
|           | Transcribed locus, strongly similar to XP_001089607.1 similar to dynein, cytoplasmic, light peptide isoform 2 [Macaca mulatta] | 0.69 |
|           | Transcribed locus, weakly similar to XP_001095360.1 similar to Nedd4 family interacting protein 1 [Macaca mulatta]             | 0.69 |
| Zfp148    | Zinc finger protein 148                                                                                                        | 0.68 |
| Ranbp2    | RAN binding protein 2                                                                                                          | 0.68 |
| Wdr44     | WD repeat domain 44                                                                                                            | 0.68 |
| Ankrd28   | Ankyrin repeat domain 28                                                                                                       | 0.68 |
| Lmtk3     | Lemur tyrosine kinase 3                                                                                                        | 0.68 |
| Cspg4     | Chondroitin sulfate proteoglycan 4                                                                                             | 0.68 |
|           | Transcribed locus, moderately similar to XP_001054207.1 similar to MASK-4E-BP3 protein [Rattus norvegicus]                     | 0.68 |
| Serinc2   | Serine incorporator 2                                                                                                          | 0.68 |
| Sestd1    | SEC14 and spectrin domains 1                                                                                                   | 0.68 |
| Fbxw5     | F-box and WD-40 domain protein 5                                                                                               | 0.68 |
| Zfr       | Zinc finger RNA binding protein                                                                                                | 0.68 |
| Perp      | PERP, TP53 apoptosis effector                                                                                                  | 0.68 |
| Ascc3     | Activating signal cointegrator 1 complex subunit 3                                                                             | 0.68 |
| Prmt7     | Protein arginine N-methyltransferase 7                                                                                         | 0.68 |
| Fli1      | Friend leukemia integration 1                                                                                                  | 0.68 |

|          |                                                                                                                                                       |      |
|----------|-------------------------------------------------------------------------------------------------------------------------------------------------------|------|
| Aqp11    | Aquaporin 11                                                                                                                                          | 0.68 |
| Exoc5    | Exocyst complex component 5                                                                                                                           | 0.68 |
| Abi1     | Abl-interactor 1                                                                                                                                      | 0.67 |
| Ahi1     | Abelson helper integration site                                                                                                                       | 0.67 |
| Zfp407   | Zinc finger protein 407                                                                                                                               | 0.67 |
| Serping1 | Serine (or cysteine) peptidase inhibitor, clade G, member 1                                                                                           | 0.67 |
|          | Transcribed locus, weakly similar to XP_001107426.1 similar to UPF3<br>regulator of nonsense transcripts homolog A isoform hUpf3p [Macaca<br>mulatta] | 0.67 |
| Tspyl5   | Testis-specific protein, Y-encoded-like 5                                                                                                             | 0.67 |
| Tmem118  | Transmembrane protein 118                                                                                                                             | 0.67 |
| Sf3b3    | Splicing factor 3b, subunit 3                                                                                                                         | 0.67 |
| Jak2     | Janus kinase 2                                                                                                                                        | 0.67 |
| Stat6    | Signal transducer and activator of transcription 6                                                                                                    | 0.67 |
| Socs5    | Suppressor of cytokine signaling 5                                                                                                                    | 0.67 |
| Zswim5   | Zinc finger, SWIM domain containing 5                                                                                                                 | 0.67 |
| Cntnap1  | Contactin associated protein-like 1                                                                                                                   | 0.67 |
| Arhgef17 | Rho guanine nucleotide exchange factor (GEF) 17                                                                                                       | 0.67 |
| Frm4b    | FERM domain containing 4B                                                                                                                             | 0.67 |
| Lsm8     | LSM8 homolog, U6 small nuclear RNA associated ( <i>S. cerevisiae</i> )                                                                                | 0.67 |
| Tle1     | Transducin-like enhancer of split 1, homolog of <i>Drosophila</i> E(spl)                                                                              | 0.67 |
| Tmem164  | Transmembrane protein 164                                                                                                                             | 0.67 |
| Csnk1g1  | Casein kinase 1, gamma 1                                                                                                                              | 0.67 |
|          | Transcribed locus, weakly similar to XP_001110315.1 similar to<br>chromosome 17 open reading frame 27 [Macaca mulatta]                                | 0.67 |
| Jundm2   | Jun dimerization protein 2                                                                                                                            | 0.67 |
| Zfand2a  | Zinc finger, AN1-type domain 2A                                                                                                                       | 0.67 |
| Scara3   | Scavenger receptor class A, member 3                                                                                                                  | 0.66 |
| Lycat    | Lysocardiolipin acyltransferase                                                                                                                       | 0.66 |

|          |                                                                          |      |
|----------|--------------------------------------------------------------------------|------|
|          | Transcribed locus, weakly similar to XP_573190.1 similar to              |      |
|          | hypothetical protein [Rattus norvegicus]                                 | 0.66 |
| Slc13a5  | Solute carrier family 13 (sodium-dependent citrate transporter), member  |      |
|          | 5                                                                        | 0.66 |
| Ccnyl1   | Cyclin Y-like 1                                                          | 0.66 |
| R3hdm2   | R3H domain containing 2                                                  | 0.66 |
| Rbak     | RB-associated KRAB repressor                                             | 0.66 |
| Ddx26b   | DEAD/H (Asp-Glu-Ala-Asp/His) box polypeptide 26B                         | 0.66 |
| Bag4     | BCL2-associated athanogene 4                                             | 0.66 |
| Shb      | Src homology 2 domain-containing transforming protein B                  | 0.66 |
| Irak1bp1 | Interleukin-1 receptor-associated kinase 1 binding protein 1             | 0.66 |
| Mcrs1    | Microspherule protein 1                                                  | 0.66 |
| Vcan     | Versican                                                                 | 0.66 |
| Usp46    | Ubiquitin specific peptidase 46                                          | 0.66 |
| Sulf1    | Sulfatase 1                                                              | 0.66 |
| Fbx110   | F-box and leucine-rich repeat protein 10                                 | 0.66 |
|          | Transcribed locus, moderately similar to XP_001087260.1 similar to       |      |
|          | pantothenate kinase 1 isoform alpha isoform 4 [Macaca mulatta]           | 0.66 |
| Pcdhga12 | Protocadherin gamma subfamily A, 12                                      | 0.66 |
| Ralgps1  | Ral GEF with PH domain and SH3 binding motif 1                           | 0.65 |
| Fscn1    | Fascin homolog 1, actin bundling protein (Strongylocentrotus purpuratus) | 0.65 |
| RbmX2    | RNA binding motif protein, X-linked 2                                    | 0.65 |
| Chst2    | Carbohydrate sulfotransferase 2                                          | 0.65 |
| Aldh1b1  | Aldehyde dehydrogenase 1 family, member B1                               | 0.65 |
| Tbc1d25  | TBC1 domain family, member 25                                            | 0.65 |
| Tmem68   | Transmembrane protein 68                                                 | 0.65 |
| Celsr2   | Cadherin EGF LAG seven-pass G-type receptor 2                            | 0.65 |
| Hif3a    | Hypoxia inducible factor 3, alpha subunit                                | 0.65 |
| Mthfr    | 5,10-methylenetetrahydrofolate reductase                                 | 0.65 |
| Tmem56   | Transmembrane protein 56                                                 | 0.65 |

|             |                                                                                                   |      |
|-------------|---------------------------------------------------------------------------------------------------|------|
| Samd1       | Sterile alpha motif domain containing 1                                                           | 0.65 |
| Ube3b       | Ubiquitin protein ligase E3B                                                                      | 0.65 |
| Nin         | Ninein                                                                                            | 0.65 |
| Actb        | Actin, beta, cytoplasmic                                                                          | 0.65 |
| D10Bwg1379e | DNA segment, Chr 10, Brigham & Women's Genetics 1379 expressed                                    | 0.65 |
| Stxbp5      | Syntaxin binding protein 5 (tomosyn)                                                              | 0.65 |
| Sult2b1     | Sulfotransferase family, cytosolic, 2B, member 1                                                  | 0.65 |
| Ar          | Androgen receptor                                                                                 | 0.65 |
| Rnf24       | Ring finger protein 24                                                                            | 0.65 |
| Lamc2       | Laminin, gamma 2                                                                                  | 0.65 |
| Grm7        | Glutamate receptor, metabotropic 7                                                                | 0.65 |
| Dhdh        | Dihydrodiol dehydrogenase (dimeric)                                                               | 0.64 |
| Mll5        | Myeloid/lymphoid or mixed-lineage leukemia 5                                                      | 0.64 |
| Ccdc80      | Coiled-coil domain containing 80                                                                  | 0.64 |
| Gabrd       | Gamma-aminobutyric acid (GABA-A) receptor, subunit delta                                          | 0.64 |
| Rbm13       | RNA binding motif protein 13                                                                      | 0.64 |
| Mbtps1      | Membrane-bound transcription factor peptidase, site 1                                             | 0.64 |
| Dagla       | Diacylglycerol lipase, alpha                                                                      | 0.64 |
| Fkbp5       | FK506 binding protein 5                                                                           | 0.64 |
| Vstm2l      | V-set and transmembrane domain containing 2-like                                                  | 0.64 |
| Smarca2     | SWI/SNF related, matrix associated, actin dependent regulator of chromatin, subfamily a, member 2 | 0.64 |
| Fbxo31      | F-box protein 31                                                                                  | 0.64 |
| Tbc1d1      | TBC1 domain family, member 1                                                                      | 0.64 |
| Rcan1       | Regulator of calcineurin 1                                                                        | 0.64 |
| Pldn        | Pallidin                                                                                          | 0.64 |
| Ccrn4l      | CCR4 carbon catabolite repression 4-like ( <i>S. cerevisiae</i> )                                 | 0.64 |
| Afap111     | Actin filament associated protein 1-like 1                                                        | 0.64 |
| Sgsm1       | Small G protein signaling modulator 1                                                             | 0.64 |
| Mllt6       | Myeloid/lymphoid or mixed lineage-leukemia translocation to 6 homolog                             | 0.64 |

(Drosophila)

|         |                                                                                             |      |
|---------|---------------------------------------------------------------------------------------------|------|
| Gfra2   | Glial cell line derived neurotrophic factor family receptor alpha 2                         | 0.64 |
| Tinagl  | Tubulointerstitial nephritis antigen-like                                                   | 0.64 |
| Huwe1   | HECT, UBA and WWE domain containing 1                                                       | 0.64 |
| Rbm11   | RNA binding motif protein 11                                                                | 0.64 |
| Cntd1   | Cyclin N-terminal domain containing 1                                                       | 0.64 |
| Pak1    | P21 (CDKN1A)-activated kinase 1                                                             | 0.64 |
| Lhfp14  | Lipoma HMGIC fusion partner-like protein 4                                                  | 0.63 |
| Erc6    | Excision repair cross-complementing rodent repair deficiency,<br>complementation group 6    | 0.63 |
| Ctdspl2 | CTD (carboxy-terminal domain, RNA polymerase II, polypeptide A)<br>small phosphatase like 2 | 0.63 |
| Zdhc12  | Zinc finger, DHHC domain containing 12                                                      | 0.63 |
| Prosc   | Proline synthetase co-transcribed                                                           | 0.63 |
| Hey1    | Hairy/enhancer-of-split related with YRPW motif 1                                           | 0.63 |
| Cxcl12  | Chemokine (C-X-C motif) ligand 12                                                           | 0.63 |
| Nlgn2   | Neurologin 2                                                                                | 0.63 |
| Vtn     | Vitronectin                                                                                 | 0.63 |
| Med8    | Mediator of RNA polymerase II transcription, subunit 8 homolog (yeast)                      | 0.63 |
| Crmp1   | Collapsin response mediator protein 1                                                       | 0.63 |
| Sesn1   | Sestrin 1                                                                                   | 0.63 |
| Hmgcr   | 3-hydroxy-3-methylglutaryl-Coenzyme A reductase                                             | 0.63 |
| Ddx21   | DEAD (Asp-Glu-Ala-Asp) box polypeptide 21                                                   | 0.63 |
| Ubr2    | Ubiquitin protein ligase E3 component n-recognin 2                                          | 0.63 |
| Mll1    | Myeloid/lymphoid or mixed-lineage leukemia 1                                                | 0.63 |
| Mybph   | Myosin binding protein H                                                                    | 0.63 |
| Etnk1   | Ethanolamine kinase 1                                                                       | 0.63 |
| Rc3h2   | Ring finger and CCCH-type zinc finger domains 2                                             | 0.63 |
| Paqr9   | Progesterin and adipoQ receptor family member IX                                            | 0.63 |



|          |                                                                                                                                  |      |
|----------|----------------------------------------------------------------------------------------------------------------------------------|------|
| Notch2   | Notch gene homolog 2 (Drosophila)                                                                                                | 0.62 |
| Txnrd1   | Thioredoxin reductase 1                                                                                                          | 0.62 |
| Pdk4     | Pyruvate dehydrogenase kinase, isoenzyme 4                                                                                       | 0.62 |
| Zfp1     | Zinc finger protein 1                                                                                                            | 0.62 |
| Dhx33    | DEAH (Asp-Glu-Ala-His) box polypeptide 33                                                                                        | 0.62 |
| Stxbp51  | Syntaxin binding protein 5-like                                                                                                  | 0.62 |
| Ankrd45  | Ankyrin repeat domain 45                                                                                                         | 0.62 |
| Rbm6     | RNA binding motif protein 6                                                                                                      | 0.62 |
| Lrrc47   | Leucine rich repeat containing 47                                                                                                | 0.62 |
| Sidt2    | SID1 transmembrane family, member 2                                                                                              | 0.62 |
| Cpne4    | Copine IV                                                                                                                        | 0.62 |
|          | Transcribed locus, strongly similar to XP_001087228.1 similar to DnaJ<br>(Hsp40) homolog, subfamily C, member 2 [Macaca mulatta] | 0.62 |
|          | Transcribed locus, strongly similar to NP_066390.1 histone family,<br>member A [Homo sapiens]                                    | 0.62 |
| Cpeb4    | Cytoplasmic polyadenylation element binding protein 4                                                                            | 0.62 |
| Shank3   | SH3/ankyrin domain gene 3                                                                                                        | 0.62 |
| Tmem180  | Transmembrane protein 180                                                                                                        | 0.62 |
| Gpc3     | Glypican 3                                                                                                                       | 0.62 |
| Zfp697   | Zinc finger protein 697                                                                                                          | 0.62 |
| Ap3b1    | Adaptor-related protein complex 3, beta 1 subunit                                                                                | 0.62 |
| Bmp7     | Bone morphogenetic protein 7                                                                                                     | 0.62 |
|          | Transcribed locus, strongly similar to XP_001102995.1 similar to<br>CG4845-PA [Macaca mulatta]                                   | 0.62 |
| BC057627 | CDNA sequence BC057627                                                                                                           | 0.61 |
| Nsun6    | NOL1/NOP2/Sun domain family 6                                                                                                    | 0.61 |
| Vamp4    | Vesicle-associated membrane protein 4                                                                                            | 0.61 |
| Thop1    | Thimet oligopeptidase 1                                                                                                          | 0.61 |
| Fzd3     | Frizzled homolog 3 (Drosophila)                                                                                                  | 0.61 |

|         |                                                                                                                          |      |
|---------|--------------------------------------------------------------------------------------------------------------------------|------|
| Myo18a  | Myosin XVIIIa                                                                                                            | 0.61 |
|         | Transcribed locus, moderately similar to XP_001099471.1<br>myeloid/lymphoid or mixed-lineage leukemia 2 [Macaca mulatta] | 0.61 |
| Cnm1    | Cyclin M1                                                                                                                | 0.61 |
| Uvrag   | UV radiation resistance associated gene                                                                                  | 0.61 |
| Spred3  | Sprouty-related, EVH1 domain containing 3                                                                                | 0.61 |
| Upf2    | UPF2 regulator of nonsense transcripts homolog (yeast)                                                                   | 0.61 |
| Zik1    | Zinc finger protein interacting with K protein 1                                                                         | 0.61 |
| Sfxn1   | Sideroflexin 1                                                                                                           | 0.61 |
| Zfp81   | Zinc finger protein 81                                                                                                   | 0.61 |
| Zzef1   | Zinc finger, ZZ-type with EF hand domain 1                                                                               | 0.61 |
| Ppp1r2  | Protein phosphatase 1, regulatory (inhibitor) subunit 2                                                                  | 0.61 |
| Gmppa   | GDP-mannose pyrophosphorylase A                                                                                          | 0.61 |
| Phf15   | PHD finger protein 15                                                                                                    | 0.61 |
| Nptx2   | Neuronal pentraxin 2                                                                                                     | 0.61 |
| Bcl9    | B-cell CLL/lymphoma 9                                                                                                    | 0.61 |
| Gsk3b   | Glycogen synthase kinase 3 beta                                                                                          | 0.61 |
| Cspg5   | Chondroitin sulfate proteoglycan 5                                                                                       | 0.61 |
| Ccdc6   | Coiled-coil domain containing 6                                                                                          | 0.61 |
| Gdf1    | Growth differentiation factor 1                                                                                          | 0.61 |
| Siah1a  | Seven in absentia 1A                                                                                                     | 0.61 |
| Pomgnt1 | Protein O-linked mannose beta1,2-N-acetylglucosaminyltransferase                                                         | 0.61 |
| Msr2    | Macrophage scavenger receptor 2                                                                                          | 0.60 |
| Dip2c   | DIP2 disco-interacting protein 2 homolog C (Drosophila)                                                                  | 0.60 |
| Dullard | Dullard homolog (Xenopus laevis)                                                                                         | 0.60 |
| Lin7c   | Lin-7 homolog C (C. elegans)                                                                                             | 0.60 |
| Prrt3   | Proline-rich transmembrane protein 3                                                                                     | 0.60 |
| Zfp61   | Zinc finger protein 61                                                                                                   | 0.60 |
|         | Transcribed locus, moderately similar to NP_001038855.1 protein<br>LOC751674 [Danio rerio]                               | 0.60 |

|         |                                                                                                                  |      |
|---------|------------------------------------------------------------------------------------------------------------------|------|
| Snapc2  | Small nuclear RNA activating complex, polypeptide 2                                                              | 0.60 |
| Nr1d1   | Nuclear receptor subfamily 1, group D, member 1                                                                  | 0.60 |
| Slc35c1 | Solute carrier family 35, member C1                                                                              | 0.60 |
| Tpst2   | Protein-tyrosine sulfotransferase 2                                                                              | 0.60 |
| Ypel2   | Yippee-like 2 (Drosophila)                                                                                       | 0.60 |
| Epn2    | Epsin 2                                                                                                          | 0.60 |
| Pcmdt1  | Protein-L-isoaspartate (D-aspartate) O-methyltransferase domain<br>containing 1                                  | 0.60 |
| Mapre2  | Microtubule-associated protein, RP/EB family, member 2                                                           | 0.60 |
| Abcb9   | ATP-binding cassette, sub-family B (MDR/TAP), member 9                                                           | 0.60 |
|         | Transcribed locus, weakly similar to XP_001073504.1 similar to Rab6<br>interacting protein 1 [Rattus norvegicus] | 0.60 |
| Rnf19b  | Ring finger protein 19B                                                                                          | 0.60 |
| Nudt11  | Nudix (nucleoside diphosphate linked moiety X)-type motif 11                                                     | 0.60 |
| Zfp39   | Zinc finger protein 39                                                                                           | 0.60 |
| Dzip11  | DAZ interacting protein 1-like                                                                                   | 0.60 |
| Ccdc21  | Coiled-coil domain containing 21                                                                                 | 0.60 |
| Klhl26  | Kelch-like 26 (Drosophila)                                                                                       | 0.60 |
| Pacs1   | Phosphofurin acidic cluster sorting protein 1                                                                    | 0.60 |
| Cenpo   | Centromere protein O                                                                                             | 0.60 |
| Mesdc1  | Mesoderm development candidate 1                                                                                 | 0.59 |
| Rps6ka2 | Ribosomal protein S6 kinase, polypeptide 2                                                                       | 0.59 |
| Pi4ka   | Phosphatidylinositol 4-kinase, catalytic, alpha polypeptide                                                      | 0.59 |
| Trio    | Triple functional domain (PTPRF interacting)                                                                     | 0.59 |
| Nolc1   | Nucleolar and coiled-body phosphoprotein 1                                                                       | 0.59 |
| Nucks1  | Nuclear casein kinase and cyclin-dependent kinase substrate 1                                                    | 0.59 |
| Ints2   | Integrator complex subunit 2                                                                                     | 0.59 |
| Mxd1    | MAX dimerization protein 1                                                                                       | 0.59 |
| Abcg2   | ATP-binding cassette, sub-family G (WHITE), member 2                                                             | 0.59 |

|           |                                                                                                                                     |       |
|-----------|-------------------------------------------------------------------------------------------------------------------------------------|-------|
| Fbxo11    | F-box protein 11                                                                                                                    | 0.59  |
| D5Ert585e | DNA segment, Chr 5, ERATO Doi 585, expressed                                                                                        | 0.59  |
| Sec22a    | SEC22 vesicle trafficking protein-like A ( <i>S. cerevisiae</i> )                                                                   | 0.59  |
| Tb11xr1   | Transducin (beta)-like 1X-linked receptor 1                                                                                         | 0.59  |
| Ndel1     | Nuclear distribution gene E-like homolog 1 ( <i>A. nidulans</i> )                                                                   | 0.59  |
| Hras1     | Harvey rat sarcoma virus oncogene 1                                                                                                 | 0.59  |
| Hlf       | Hepatic leukemia factor                                                                                                             | 0.59  |
| Id2       | Inhibitor of DNA binding 2                                                                                                          | 0.59  |
| Smug1     | Single-strand selective monofunctional uracil DNA glycosylase                                                                       | 0.59  |
| Jarid1b   | Jumonji, AT rich interactive domain 1B (Rbp2 like)                                                                                  | 0.59  |
| Grem2     | Gremlin 2 homolog, cysteine knot superfamily ( <i>Xenopus laevis</i> )                                                              | 0.59  |
| Igf2r     | Insulin-like growth factor 2 receptor                                                                                               | 0.59  |
| Srrp      | Serine-arginine repressor protein                                                                                                   | 0.59  |
| Vps54     | Vacuolar protein sorting 54 (yeast)                                                                                                 | 0.59  |
| Ptprb     | Protein tyrosine phosphatase, receptor type, B                                                                                      | 0.59  |
| Yod1      | YOD1 OTU deubiquitinating enzyme 1 homologue ( <i>S. cerevisiae</i> )                                                               | 0.59  |
| Dhrs4     | Dehydrogenase/reductase (SDR family) member 4                                                                                       | -0.59 |
| Trim45    | Tripartite motif-containing 45                                                                                                      | -0.59 |
|           | Transcribed locus, moderately similar to NP_077182.1 dehydrogenase<br>(ubiquinone) 1, subcomplex unknown, 2 [ <i>Mus musculus</i> ] | -0.59 |
| C1qb      | Complement component 1, q subcomponent, beta polypeptide                                                                            | -0.59 |
| Clcc1     | Chloride channel CLIC-like 1                                                                                                        | -0.59 |
| Tesk2     | Testis-specific kinase 2                                                                                                            | -0.59 |
| Rcctb1    | Regulator of chromosome condensation (RCC1) and BTB (POZ) domain<br>containing protein 1                                            | -0.59 |
| Dusp26    | Dual specificity phosphatase 26 (putative)                                                                                          | -0.59 |
| Gm323     | Gene model 323, (NCBI)                                                                                                              | -0.59 |
| Pdcl      | Phosducin-like                                                                                                                      | -0.59 |
| Acox3     | Acyl-Coenzyme A oxidase 3, pristanoyl                                                                                               | -0.59 |

|         |                                                                                                                                       |       |
|---------|---------------------------------------------------------------------------------------------------------------------------------------|-------|
| DcblD2  | Discoidin, CUB and LCCL domain containing 2                                                                                           | -0.59 |
| Wdfy1   | WD repeat and FYVE domain containing 1                                                                                                | -0.59 |
|         | Transcribed locus, moderately similar to XP_001086024.1 cathepsin L<br>isoform 3 [Macaca mulatta]                                     | -0.59 |
| Prkcn   | Protein kinase C, nu                                                                                                                  | -0.59 |
| Zfp110  | Zinc finger protein 110                                                                                                               | -0.59 |
|         | Transcribed locus, strongly similar to XP_001087506.1 similar to<br>vestigial like 4 [Macaca mulatta]                                 | -0.59 |
|         | Transcribed locus, moderately similar to XP_001095686.1 isocitrate<br>dehydrogenase 2 (NADP+), mitochondrial [Macaca mulatta]         | -0.59 |
| Nt5c3l  | 5'-nucleotidase, cytosolic III-like                                                                                                   | -0.59 |
| Zfp329  | Zinc finger protein 329                                                                                                               | -0.59 |
| Fzd9    | Frizzled homolog 9 (Drosophila)                                                                                                       | -0.59 |
| Slc9a7  | Solute carrier family 9 (sodium/hydrogen exchanger), isoform 7                                                                        | -0.59 |
| Gtf3a   | General transcription factor III A                                                                                                    | -0.59 |
| Dleu7   | Deleted in lymphocytic leukemia, 7                                                                                                    | -0.59 |
| Gja9    | Gap junction protein, alpha 9                                                                                                         | -0.59 |
| Zfp14   | Zinc finger protein 14                                                                                                                | -0.59 |
| Ssh1    | Slingshot homolog 1 (Drosophila)                                                                                                      | -0.59 |
| Pcsk1n  | Proprotein convertase subtilisin/kexin type 1 inhibitor                                                                               | -0.59 |
| Dis3l   | DIS3 mitotic control homolog (S. cerevisiae)-like                                                                                     | -0.59 |
| Ets1    | E26 avian leukemia oncogene 1, 5' domain                                                                                              | -0.60 |
| Gm444   | Gene model 444, (NCBI)                                                                                                                | -0.60 |
|         | Transcribed locus, moderately similar to XP_001113353.1 glioma<br>tumor suppressor candidate region gene 2 isoform 4 [Macaca mulatta] | -0.60 |
| Limk2   | LIM motif-containing protein kinase 2                                                                                                 | -0.60 |
| Hcfc1r1 | Host cell factor C1 regulator 1 (XPO1-dependent)                                                                                      | -0.60 |
| Rbj     | Rab and DnaJ domain containing                                                                                                        | -0.60 |
| Lama2   | Laminin, alpha 2                                                                                                                      | -0.60 |

|          |                                                                                                                              |       |
|----------|------------------------------------------------------------------------------------------------------------------------------|-------|
| Mthfd2   | Methylenetetrahydrofolate dehydrogenase (NAD <sup>+</sup> dependent),<br>methenyltetrahydrofolate cyclohydrolase             | -0.60 |
| Prkaa1   | Protein kinase, AMP-activated, alpha 1 catalytic subunit                                                                     | -0.60 |
| Ctsc     | Cathepsin C                                                                                                                  | -0.60 |
| Arhgef6  | Rac/Cdc42 guanine nucleotide exchange factor (GEF) 6                                                                         | -0.60 |
| Gpr137   | G protein-coupled receptor 137                                                                                               | -0.60 |
| Rspo3    | R-spondin 3 homolog ( <i>Xenopus laevis</i> )                                                                                | -0.60 |
| Limd1    | LIM domains containing 1                                                                                                     | -0.60 |
| Manba    | Mannosidase, beta A, lysosomal                                                                                               | -0.60 |
| Cln8     | Ceroid-lipofuscinosis, neuronal 8                                                                                            | -0.60 |
| Sv2a     | Synaptic vesicle glycoprotein 2 a                                                                                            | -0.60 |
| Smad5    | MAD homolog 5 ( <i>Drosophila</i> )                                                                                          | -0.60 |
| Rnf135   | Ring finger protein 135                                                                                                      | -0.60 |
| Vwa1     | Von Willebrand factor A domain containing 1                                                                                  | -0.60 |
| Prkcm    | Protein kinase C, mu                                                                                                         | -0.60 |
| Ints8    | Integrator complex subunit 8                                                                                                 | -0.60 |
|          | CDNA, clone:Y1G0102N19, strand:minus,<br>reference:ENSEMBL:Mouse-Transcript-ENST:ENSMUST00000042546,<br>based on BLAT search | -0.60 |
| Gpr108   | G protein-coupled receptor 108                                                                                               | -0.60 |
| Il12rb2  | Interleukin 12 receptor, beta 2                                                                                              | -0.60 |
| Chrn2    | Cholinergic receptor, nicotinic, beta polypeptide 2 (neuronal)                                                               | -0.61 |
| Gm114    | Gene model 114, (NCBI)                                                                                                       | -0.61 |
| Lypla1   | Lysophospholipase 1                                                                                                          | -0.61 |
| B3galnt2 | UDP-GalNAc:betaGlcNAc beta 1,3-galactosaminyltransferase,<br>polypeptide 2                                                   | -0.61 |
| Akr7a5   | Aldo-keto reductase family 7, member A5 (aflatoxin aldehyde reductase)                                                       | -0.61 |
| Ccdc22   | Coiled-coil domain containing 22                                                                                             | -0.61 |
| Cdr2l    | Cerebellar degeneration-related protein 2-like                                                                               | -0.61 |

|          |                                                                                                                                                    |       |
|----------|----------------------------------------------------------------------------------------------------------------------------------------------------|-------|
| Itih5    | Inter-alpha (globulin) inhibitor H5                                                                                                                | -0.61 |
| BC065085 | CDNA sequence BC065085                                                                                                                             | -0.61 |
| P2rx4    | Purinergic receptor P2X, ligand-gated ion channel 4                                                                                                | -0.61 |
|          | Transcribed locus, strongly similar to XP_001053409.1 similar to<br>CG6878-PA isoform 2 [Rattus norvegicus]                                        | -0.61 |
| Rassf2   | Ras association (RalGDS/AF-6) domain family 2                                                                                                      | -0.61 |
| Lyplal1  | Lysophospholipase-like 1                                                                                                                           | -0.61 |
| Serpind1 | Serine (or cysteine) peptidase inhibitor, clade D, member 1                                                                                        | -0.61 |
| Maged2   | Melanoma antigen, family D, 2                                                                                                                      | -0.61 |
| Stk39    | Serine/threonine kinase 39, STE20/SPS1 homolog (yeast)                                                                                             | -0.61 |
|          | Transcribed locus, moderately similar to XP_001108259.1 similar to<br>acyl-CoA synthetase long-chain family member 3 isoform 2 [Macaca<br>mulatta] | -0.61 |
| Slco3a1  | Solute carrier organic anion transporter family, member 3a1                                                                                        | -0.61 |
| Hexim2   | Hexamethylene bis-acetamide inducible 2                                                                                                            | -0.61 |
| Trim66   | Tripartite motif-containing 66                                                                                                                     | -0.61 |
| Acsbg1   | Acyl-CoA synthetase bubblegum family member 1                                                                                                      | -0.61 |
| Golga7   | Golgi autoantigen, golgin subfamily a, 7                                                                                                           | -0.61 |
|          | Transcribed locus, weakly similar to XP_001104789.1 similar to<br>CG10889-PA [Macaca mulatta]                                                      | -0.61 |
| D4Wsu53e | DNA segment, Chr 4, Wayne State University 53, expressed                                                                                           | -0.61 |
| D0H4S114 | DNA segment, human D4S114                                                                                                                          | -0.61 |
| Mcm4     | Minichromosome maintenance deficient 4 homolog ( <i>S. cerevisiae</i> )                                                                            | -0.62 |
| Pkp4     | Plakophilin 4                                                                                                                                      | -0.62 |
| Rin2     | Ras and Rab interactor 2                                                                                                                           | -0.62 |
| Rab31    | RAB31, member RAS oncogene family                                                                                                                  | -0.62 |
| Atp1a3   | ATPase, Na <sup>+</sup> /K <sup>+</sup> transporting, alpha 3 polypeptide                                                                          | -0.62 |
| Sema5a   | Sema domain, seven thrombospondin repeats (type 1 and type 1-like),<br>transmembrane domain (TM) and short cytoplasmic domain,                     | -0.62 |

(semaphorin) 5A

|          |                                                                                                   |       |
|----------|---------------------------------------------------------------------------------------------------|-------|
| Rfc2     | Replication factor C (activator 1) 2                                                              | -0.62 |
| Acaa2    | Acetyl-Coenzyme A acyltransferase 2 (mitochondrial<br>3-oxoacyl-Coenzyme A thiolase)              | -0.62 |
| Pcdhb3   | Protocadherin beta 3                                                                              | -0.62 |
| H1f0     | H1 histone family, member 0                                                                       | -0.62 |
| Pbxip1   | Pre-B-cell leukemia transcription factor interacting protein 1                                    | -0.62 |
| Htr1a    | 5-hydroxytryptamine (serotonin) receptor 1A                                                       | -0.62 |
|          | Transcribed locus, strongly similar to XP_001069806.1 hypothetical<br>protein [Rattus norvegicus] | -0.62 |
| Mrpl51   | Mitochondrial ribosomal protein L51                                                               | -0.62 |
| Megf10   | Multiple EGF-like-domains 10                                                                      | -0.62 |
| Enpp6    | Ectonucleotide pyrophosphatase/phosphodiesterase 6                                                | -0.62 |
| Pcdhb22  | Protocadherin beta 22                                                                             | -0.62 |
| Lgmn     | Legumain                                                                                          | -0.62 |
| Stx4a    | Syntaxin 4A (placental)                                                                           | -0.62 |
| Tyw1     | TRNA-yW synthesizing protein 1 homolog ( <i>S. cerevisiae</i> )                                   | -0.62 |
| Anapc10  | Anaphase promoting complex subunit 10                                                             | -0.62 |
| AK129128 | CDNA sequence AK129128                                                                            | -0.62 |
| Tekt5    | Tektin 5                                                                                          | -0.62 |
| Wipf1    | WAS/WASL interacting protein family, member 1                                                     | -0.63 |
| Paqr7    | Progesterin and adipoQ receptor family member VII                                                 | -0.63 |
| Kcnip4   | Kv channel interacting protein 4                                                                  | -0.63 |
| Gnas     | GNAS (guanine nucleotide binding protein, alpha stimulating) complex<br>locus                     | -0.63 |
| Zfp787   | Zinc finger protein 787                                                                           | -0.63 |
| Cd97     | CD97 antigen                                                                                      | -0.63 |
| Cyp26b1  | Cytochrome P450, family 26, subfamily b, polypeptide 1                                            | -0.63 |



|          |                                                                                                         |       |
|----------|---------------------------------------------------------------------------------------------------------|-------|
| Zfp606   | Zinc finger protein 606                                                                                 | -0.63 |
| Plxnb2   | Plexin B2                                                                                               | -0.63 |
| Epha10   | Eph receptor A10                                                                                        | -0.63 |
| Ctss     | Cathepsin S                                                                                             | -0.63 |
| Cnm4     | Cyclin M4                                                                                               | -0.63 |
| Zfp213   | Zinc finger protein 213                                                                                 | -0.63 |
| Kif16b   | Kinesin family member 16B                                                                               | -0.63 |
| Rusc1    | RUN and SH3 domain containing 1                                                                         | -0.63 |
| Syn3     | Synapsin III                                                                                            | -0.63 |
| Mpp6     | Membrane protein, palmitoylated 6 (MAGUK p55 subfamily member 6)                                        | -0.63 |
| Efha1    | EF hand domain family A1                                                                                | -0.64 |
| Cd151    | CD151 antigen                                                                                           | -0.64 |
| Map4k4   | Mitogen-activated protein kinase kinase kinase kinase 4                                                 | -0.64 |
| Hps4     | Hermansky-Pudlak syndrome 4 homolog (human)                                                             | -0.64 |
|          | Transcribed locus, moderately similar to XP_001094389.1 hypothetical protein isoform 2 [Macaca mulatta] | -0.64 |
| Snta1    | Syntrophin, acidic 1                                                                                    | -0.64 |
| Cplx1    | Complexin 1                                                                                             | -0.64 |
| Serpnb1b | Serine (or cysteine) peptidase inhibitor, clade B, member 1b                                            | -0.64 |
| P4ha2    | Procollagen-proline, 2-oxoglutarate 4-dioxygenase (proline 4-hydroxylase), alpha II polypeptide         | -0.64 |
| Stat5b   | Signal transducer and activator of transcription 5B                                                     | -0.64 |
| Kcnj16   | Potassium inwardly-rectifying channel, subfamily J, member 16                                           | -0.64 |
| Upp2     | Uridine phosphorylase 2                                                                                 | -0.64 |
| Ecel1    | Endothelin converting enzyme-like 1                                                                     | -0.64 |
| Litaf    | LPS-induced TN factor                                                                                   | -0.64 |
| Def8     | Differentially expressed in FDCP 8                                                                      | -0.64 |
| Ppm1e    | Protein phosphatase 1E (PP2C domain containing)                                                         | -0.64 |
| Gprasp2  | G protein-coupled receptor associated sorting protein 2                                                 | -0.64 |

|          |                                                                                        |       |
|----------|----------------------------------------------------------------------------------------|-------|
| Lpin1    | Lipin 1                                                                                | -0.64 |
| Tbc1d12  | TBC1D12: TBC1 domain family, member 12                                                 | -0.64 |
| Scd2     | Stearoyl-Coenzyme A desaturase 2                                                       | -0.64 |
| Med30    | Mediator complex subunit 30                                                            | -0.64 |
| Dbnnd2   | Dysbindin (dystrobrevin binding protein 1) domain containing 2                         | -0.64 |
| Atp10b   | ATPase, class V, type 10B                                                              | -0.65 |
| Snap23   | Synaptosomal-associated protein 23                                                     | -0.65 |
| BC018371 | CDNA sequence BC018371                                                                 | -0.65 |
| Vat1     | Vesicle amine transport protein 1 homolog (T californica)                              | -0.65 |
| Gcnt1    | Glucosaminyl (N-acetyl) transferase 1, core 2                                          | -0.65 |
| Pxmp2    | Peroxisomal membrane protein 2                                                         | -0.65 |
| Sepn1    | Selenoprotein N, 1                                                                     | -0.65 |
| Nedd8    | Neural precursor cell expressed, developmentally down-regulated gene 8                 | -0.65 |
| Hus1     | Hus1 homolog (S. pombe)                                                                | -0.65 |
| Nxt2     | Nuclear transport factor 2-like export factor 2                                        | -0.65 |
| Itgb3bp  | Integrin beta 3 binding protein (beta3-endonexin)                                      | -0.65 |
| Ctso     | Cathepsin O                                                                            | -0.65 |
| Lypla2   | Lysophospholipase 2                                                                    | -0.65 |
| Qsox1    | Quiescin Q6 sulfhydryl oxidase 1                                                       | -0.65 |
| Slc25a10 | Solute carrier family 25 (mitochondrial carrier, dicarboxylate transporter), member 10 | -0.65 |
| Dok7     | Docking protein 7                                                                      | -0.65 |
| Gpr177   | G protein-coupled receptor 177                                                         | -0.65 |
| Fundc1   | FUN14 domain containing 1                                                              | -0.65 |
| Tmem176b | Transmembrane protein 176B                                                             | -0.65 |
| Adpgk    | ADP-dependent glucokinase                                                              | -0.66 |
| Ndufa13  | NADH dehydrogenase (ubiquinone) 1 alpha subcomplex, 13                                 | -0.66 |
| Rftn2    | Raftlin family member 2                                                                | -0.66 |
| Tkt      | Transketolase                                                                          | -0.66 |
| Gpr56    | G protein-coupled receptor 56                                                          | -0.66 |

|           |                                                                        |       |
|-----------|------------------------------------------------------------------------|-------|
| Pigt      | Phosphatidylinositol glycan anchor biosynthesis, class T               | -0.66 |
| Nudt4     | Nudix (nucleoside diphosphate linked moiety X)-type motif 4            | -0.66 |
| Xrcc6     | X-ray repair complementing defective repair in Chinese hamster cells 6 | -0.66 |
| Kbtbd3    | Kelch repeat and BTB (POZ) domain containing 3                         | -0.66 |
| Slc20a2   | Solute carrier family 20, member 2                                     | -0.66 |
| Prkar2a   | Protein kinase, cAMP dependent regulatory, type II alpha               | -0.66 |
| Jrkl      | Jerky homolog-like (mouse)                                             | -0.66 |
| Cdc14b    | CDC14 cell division cycle 14 homolog B ( <i>S. cerevisiae</i> )        | -0.66 |
| Stard5    | StAR-related lipid transfer (START) domain containing 5                | -0.66 |
| Rwdd4a    | RWD domain containing 4A                                               | -0.66 |
| LOC627626 | Similar to CG11212-PA                                                  | -0.66 |
| Sncb      | Synuclein, beta                                                        | -0.66 |
| BC002216  | CDNA sequence BC002216                                                 | -0.66 |
| Agl       | Amylo-1,6-glucosidase, 4-alpha-glucanotransferase                      | -0.66 |
| Ttf2      | Transcription termination factor, RNA polymerase II                    | -0.66 |
| Tjp2      | Tight junction protein 2                                               | -0.66 |
| Atg9b     | ATG9 autophagy related 9 homolog B ( <i>S. cerevisiae</i> )            | -0.66 |
| Kif5b     | Kinesin family member 5B                                               | -0.66 |
| Zfp521    | Zinc finger protein 521                                                | -0.66 |
| Mycbp     | C-myc binding protein                                                  | -0.66 |
| Slc29a3   | Solute carrier family 29 (nucleoside transporters), member 3           | -0.67 |
| Csf1      | Colony stimulating factor 1 (macrophage)                               | -0.67 |
| Rcn2      | Reticulocalbin 2                                                       | -0.67 |
| Ppargc1b  | Peroxisome proliferative activated receptor, gamma, coactivator 1 beta | -0.67 |
| Fnta      | Farnesyltransferase, CAAX box, alpha                                   | -0.67 |
| Uqcrcq    | Ubiquinol-cytochrome c reductase, complex III subunit VII              | -0.67 |
| Sergef    | Secretion regulating guanine nucleotide exchange factor                | -0.67 |
| Bmp2k     | BMP2 inducible kinase                                                  | -0.67 |
| Shroom4   | Shroom family member 4                                                 | -0.67 |
| Mrps5     | Mitochondrial ribosomal protein S5                                     | -0.67 |

|          |                                                                                 |       |
|----------|---------------------------------------------------------------------------------|-------|
| Myo1c    | Myosin IC                                                                       | -0.67 |
| Fkbp4    | FK506 binding protein 4                                                         | -0.67 |
| Pofut1   | Protein O-fucosyltransferase 1                                                  | -0.68 |
| Lage3    | L antigen family, member 3                                                      | -0.68 |
| Axin2    | Axin2                                                                           | -0.68 |
| Scly     | Selenocysteine lyase                                                            | -0.68 |
| Phka1    | Phosphorylase kinase alpha 1                                                    | -0.68 |
| Ankrd44  | Ankyrin repeat domain 44                                                        | -0.68 |
| Crkl     | V-crk sarcoma virus CT10 oncogene homolog (avian)-like                          | -0.68 |
| Gab2     | Growth factor receptor bound protein 2-associated protein 2                     | -0.68 |
| Adra1d   | Adrenergic receptor, alpha 1d                                                   | -0.68 |
| Nhlrc2   | NHL repeat containing 2                                                         | -0.68 |
| Chst3    | Carbohydrate (chondroitin 6/keratan) sulfotransferase 3                         | -0.68 |
| Scrt1    | Scratch homolog 1, zinc finger protein (Drosophila)                             | -0.68 |
| Slc16a9  | Solute carrier family 16 (monocarboxylic acid transporters), member 9           | -0.68 |
| Npc2     | Niemann Pick type C2                                                            | -0.68 |
| Hdac8    | Histone deacetylase 8                                                           | -0.68 |
| Ccdc100  | Coiled-coil domain containing 100                                               | -0.68 |
| Zfp764   | Zinc finger protein 764                                                         | -0.68 |
| Tubb4    | Tubulin, beta 4                                                                 | -0.68 |
| Mamdc4   | MAM domain containing 4                                                         | -0.68 |
| Tmc7     | Transmembrane channel-like gene family 7                                        | -0.69 |
| Stxbp6   | Syntaxin binding protein 6 (amisyn)                                             | -0.69 |
| Acot11   | Acyl-CoA thioesterase 11                                                        | -0.69 |
| Slc35e3  | Solute carrier family 35, member E3                                             | -0.69 |
| Gstcd    | Glutathione S-transferase, C-terminal domain containing                         | -0.69 |
| Prkra    | Protein kinase, interferon inducible double stranded RNA dependent<br>activator | -0.69 |
| BC030046 | CDNA sequence BC030046                                                          | -0.69 |
| BC006662 | CDNA sequence BC006662                                                          | -0.69 |

|           |                                                                                                                                                       |       |
|-----------|-------------------------------------------------------------------------------------------------------------------------------------------------------|-------|
| Unc119b   | Unc-119 homolog B ( <i>C. elegans</i> )                                                                                                               | -0.69 |
| Trp53inp2 | Transformation related protein 53 inducible nuclear protein 2                                                                                         | -0.69 |
| Mrpl39    | Mitochondrial ribosomal protein L39                                                                                                                   | -0.69 |
| B3gnt1    | UDP-GlcNAc:betaGal beta-1,3-N-acetylglucosaminyltransferase-like 1                                                                                    | -0.69 |
| Csda      | Cold shock domain protein A                                                                                                                           | -0.69 |
|           | Transcribed locus, moderately similar to XP_001089760.1 similar to glutaminyl-tRNA synthase (glutamine-hydrolyzing)-like 1 isoform 3 [Macaca mulatta] | -0.69 |
| Sdc4      | Syndecan 4                                                                                                                                            | -0.69 |
| Gpr165    | G protein-coupled receptor 165                                                                                                                        | -0.69 |
| Zfp454    | Zinc finger protein 454                                                                                                                               | -0.69 |
| Sirt6     | Sirtuin 6 (silent mating type information regulation 2, homolog) 6 ( <i>S. cerevisiae</i> )                                                           | -0.69 |
| Nab1      | Ngfi-A binding protein 1                                                                                                                              | -0.69 |
| Parp12    | Poly (ADP-ribose) polymerase family, member 12                                                                                                        | -0.69 |
| Klf6      | Kruppel-like factor 6                                                                                                                                 | -0.70 |
| Cebpg     | CCAAT/enhancer binding protein (C/EBP), gamma                                                                                                         | -0.70 |
| Ube2l6    | Ubiquitin-conjugating enzyme E2L 6                                                                                                                    | -0.70 |
| BC053440  | CDNA sequence BC053440                                                                                                                                | -0.70 |
| Itsn1     | Intersectin 1 (SH3 domain protein 1A)                                                                                                                 | -0.70 |
| Crtap     | Cartilage associated protein                                                                                                                          | -0.70 |
| Spg20     | Spastic paraplegia 20, spartin (Troyer syndrome) homolog (human)                                                                                      | -0.70 |
| Adamtsl4  | ADAMTS-like 4                                                                                                                                         | -0.70 |
| Ptpla     | Protein tyrosine phosphatase-like (proline instead of catalytic arginine), member a                                                                   | -0.70 |
| Rrbp1     | Ribosome binding protein 1                                                                                                                            | -0.70 |
| Msi2      | Musashi homolog 2 ( <i>Drosophila</i> )                                                                                                               | -0.70 |
| Rpa1      | Replication protein A1                                                                                                                                | -0.70 |

|              |                                                                                                                                                   |       |
|--------------|---------------------------------------------------------------------------------------------------------------------------------------------------|-------|
| Gabpb2       | GA repeat binding protein, beta 2                                                                                                                 | -0.70 |
| Adam17       | A disintegrin and metallopeptidase domain 17                                                                                                      | -0.70 |
| Cep250       | Centrosomal protein 250                                                                                                                           | -0.70 |
| Pigv         | Phosphatidylinositol glycan anchor biosynthesis, class V                                                                                          | -0.70 |
| Mex3d        | Mex3 homolog D (C. elegans)                                                                                                                       | -0.70 |
| Aldh9a1      | Aldehyde dehydrogenase 9, subfamily A1                                                                                                            | -0.71 |
| LOC100039302 | Similar to Motile sperm domain containing 1                                                                                                       | -0.71 |
| Bmpr1b       | Bone morphogenetic protein receptor, type 1B                                                                                                      | -0.71 |
| Arhgap12     | Rho GTPase activating protein 12                                                                                                                  | -0.71 |
| Auh          | AU RNA binding protein/enoyl-coenzyme A hydratase                                                                                                 | -0.71 |
| Il6st        | Interleukin 6 signal transducer                                                                                                                   | -0.71 |
| Zfp449       | Zinc finger protein 449                                                                                                                           | -0.71 |
| Fgfr2        | Fibroblast growth factor receptor 2                                                                                                               | -0.71 |
|              | Transcribed locus, moderately similar to XP_001091569.1 similar to<br>Ca <sup>2+</sup> -dependent secretion activator isoform 3 [Macaca mulatta]  | -0.71 |
| Ubtd1        | Ubiquitin domain containing 1                                                                                                                     | -0.71 |
| Tsc22d4      | TSC22 domain family 4                                                                                                                             | -0.71 |
| Txnl1        | Thioredoxin-like 1                                                                                                                                | -0.71 |
|              | Transcribed locus, weakly similar to XP_001082646.1 similar to<br>NADH dehydrogenase (ubiquinone) 1 beta subcomplex, 8, 19kDa<br>[Macaca mulatta] | -0.71 |
| Cpm          | Carboxypeptidase M                                                                                                                                | -0.71 |
| Paqr4        | Progesterin and adipoQ receptor family member IV                                                                                                  | -0.71 |
| Acsl3        | Acyl-CoA synthetase long-chain family member 3                                                                                                    | -0.71 |
| Tubb2c       | Tubulin, beta 2c                                                                                                                                  | -0.71 |
| Kdelc1       | KDEL (Lys-Asp-Glu-Leu) containing 1                                                                                                               | -0.71 |
| Zbtb12       | Zinc finger and BTB domain containing 12                                                                                                          | -0.71 |
| Gpt1         | Glutamic pyruvic transaminase 1, soluble                                                                                                          | -0.72 |
| Bace2        | Beta-site APP-cleaving enzyme 2                                                                                                                   | -0.72 |

|          |                                                                                                              |       |
|----------|--------------------------------------------------------------------------------------------------------------|-------|
| Psen2    | Presenilin 2                                                                                                 | -0.72 |
| D8Ert82e | DNA segment, Chr 8, ERATO Doi 82, expressed                                                                  | -0.72 |
| Slc35f5  | Solute carrier family 35, member F5                                                                          | -0.72 |
| Amt      | Aminomethyltransferase                                                                                       | -0.72 |
| Ppp1r14b | Protein phosphatase 1, regulatory (inhibitor) subunit 14B                                                    | -0.72 |
| Ntn4     | Netrin 4                                                                                                     | -0.72 |
| Mad111   | Mitotic arrest deficient 1-like 1                                                                            | -0.72 |
|          | Transcribed locus, moderately similar to XP_001092745.1 similar to<br>ribosomal protein L18 [Macaca mulatta] | -0.72 |
| Maob     | Monoamine oxidase B                                                                                          | -0.72 |
| Mdm1     | Transformed mouse 3T3 cell double minute 1                                                                   | -0.72 |
| Ninj1    | Ninjurin 1                                                                                                   | -0.72 |
| Gpr37l1  | G protein-coupled receptor 37-like 1                                                                         | -0.72 |
| Pacs2    | Phosphofurin acidic cluster sorting protein 2                                                                | -0.72 |
| Car2     | Carbonic anhydrase 2                                                                                         | -0.72 |
| Gna12    | Guanine nucleotide binding protein, alpha 12                                                                 | -0.72 |
| Ubfd1    | Ubiquitin family domain containing 1                                                                         | -0.72 |
| Ermp1    | Endoplasmic reticulum metalloproteinase 1                                                                    | -0.72 |
| BC034090 | CDNA sequence BC034090                                                                                       | -0.72 |
| Gpr17    | G protein-coupled receptor 17                                                                                | -0.72 |
| Ccdc51   | Coiled-coil domain containing 51                                                                             | -0.72 |
| Tcte1    | T-complex-associated testis expressed 1                                                                      | -0.73 |
| Ndph     | Norrie disease homolog                                                                                       | -0.73 |
| Pank1    | Pantothenate kinase 1                                                                                        | -0.73 |
| Chst8    | Carbohydrate (N-acetylgalactosamine 4-0) sulfotransferase 8                                                  | -0.73 |
| Gm973    | Gene model 973, (NCBI)                                                                                       | -0.73 |
| Zfp748   | Zinc finger protein 748                                                                                      | -0.73 |
| Klc4     | Kinesin light chain 4                                                                                        | -0.73 |
| Fuca2    | Fucosidase, alpha-L- 2, plasma                                                                               | -0.73 |
| Lrch1    | Leucine-rich repeats and calponin homology (CH) domain containing 1                                          | -0.73 |

|          |                                                                                                                                                              |       |
|----------|--------------------------------------------------------------------------------------------------------------------------------------------------------------|-------|
| Dalrd3   | DALR anticodon binding domain containing 3                                                                                                                   | -0.73 |
| Aldh3b1  | Aldehyde dehydrogenase 3 family, member B1                                                                                                                   | -0.73 |
| Tmem106c | Transmembrane protein 106C                                                                                                                                   | -0.73 |
| Zscan20  | Zinc finger and SCAN domains 20                                                                                                                              | -0.74 |
| Efna1    | Ephrin A1                                                                                                                                                    | -0.74 |
| Unc13c   | Unc-13 homolog C ( <i>C. elegans</i> )                                                                                                                       | -0.74 |
| Cflar    | CASP8 and FADD-like apoptosis regulator                                                                                                                      | -0.74 |
|          | Transcribed locus, moderately similar to XP_001116342.1 similar to<br>K11G12.6 [ <i>Macaca mulatta</i> ]                                                     | -0.74 |
| Lgi4     | Leucine-rich repeat LGI family, member 4                                                                                                                     | -0.74 |
| Abca2    | ATP-binding cassette, sub-family A (ABC1), member 2                                                                                                          | -0.74 |
| Wdr46    | WD repeat domain 46                                                                                                                                          | -0.74 |
| Rcan3    | Regulator of calcineurin 3                                                                                                                                   | -0.74 |
| Sema6d   | Sema domain, transmembrane domain (TM), and cytoplasmic domain,<br>(semaphorin) 6D                                                                           | -0.74 |
| Hrasl3   | HRAS like suppressor 3                                                                                                                                       | -0.74 |
| Trim56   | Tripartite motif-containing 56                                                                                                                               | -0.74 |
| Tns3     | Tensin 3                                                                                                                                                     | -0.74 |
|          | Transcribed locus, weakly similar to XP_001106167.1 similar to<br>protein tyrosine phosphatase, non-receptor type 14 isoform 1 [ <i>Macaca<br/>mulatta</i> ] | -0.74 |
| Adipor2  | Adiponectin receptor 2                                                                                                                                       | -0.74 |
| Rpp25    | Ribonuclease P 25 subunit (human)                                                                                                                            | -0.74 |
| Socs4    | Suppressor of cytokine signaling 4                                                                                                                           | -0.75 |
| BB181834 | Expressed sequence BB181834                                                                                                                                  | -0.75 |
| Slc43a2  | Solute carrier family 43, member 2                                                                                                                           | -0.75 |
| Pcaf     | P300/CBP-associated factor                                                                                                                                   | -0.75 |
| Ethe1    | Ethylmalonic encephalopathy 1                                                                                                                                | -0.75 |
| Col8a1   | Collagen, type VIII, alpha 1                                                                                                                                 | -0.75 |



|           |                                                                                                                             |       |
|-----------|-----------------------------------------------------------------------------------------------------------------------------|-------|
| Hspb8     | Heat shock protein 8                                                                                                        | -0.75 |
| Tbkbp1    | TBK1 binding protein 1                                                                                                      | -0.75 |
| Kcnc1     | Potassium voltage gated channel, Shaw-related subfamily, member 1                                                           | -0.75 |
| Faf1      | Fas-associated factor 1                                                                                                     | -0.75 |
| Il17rd    | Interleukin 17 receptor D                                                                                                   | -0.75 |
| Ube112    | Ubiquitin-activating enzyme E1-like 2                                                                                       | -0.75 |
| Kctd12b   | Potassium channel tetramerisation domain containing 12b                                                                     | -0.75 |
|           | Transcribed locus, weakly similar to XP_001108910.1 similar to<br>vasoactive intestinal peptide receptor 1 [Macaca mulatta] | -0.75 |
| Prlr      | Prolactin receptor                                                                                                          | -0.75 |
| Tmc3      | Transmembrane channel-like gene family 3                                                                                    | -0.75 |
| Mif4gd    | MIF4G domain containing                                                                                                     | -0.75 |
| Bche      | Butyrylcholinesterase                                                                                                       | -0.75 |
| Tmem8     | Transmembrane protein 8 (five membrane-spanning domains)                                                                    | -0.76 |
| Mrm1      | Mitochondrial rRNA methyltransferase 1 homolog ( <i>S. cerevisiae</i> )                                                     | -0.76 |
| Olfml1    | Olfactomedin-like 1                                                                                                         | -0.76 |
| Acss1     | Acyl-CoA synthetase short-chain family member 1                                                                             | -0.76 |
| Zfp566    | Zinc finger protein 566                                                                                                     | -0.76 |
| Capn10    | Calpain 10                                                                                                                  | -0.76 |
| Gad2      | Glutamic acid decarboxylase 2                                                                                               | -0.76 |
| Pftk1     | PFTAIRE protein kinase 1                                                                                                    | -0.76 |
| Prps2     | Phosphoribosyl pyrophosphate synthetase 2                                                                                   | -0.76 |
| Wnk4      | WNK lysine deficient protein kinase 4                                                                                       | -0.76 |
| C1ql1     | Complement component 1, q subcomponent-like 1                                                                               | -0.76 |
| Oxr1      | Oxidation resistance 1                                                                                                      | -0.76 |
| Mtap4     | Microtubule-associated protein 4                                                                                            | -0.76 |
| Alk       | Anaplastic lymphoma kinase                                                                                                  | -0.76 |
| Itfg3     | Integrin alpha FG-GAP repeat containing 3                                                                                   | -0.76 |
| LOC244958 | Similar to Chromosome 6 open reading frame 117                                                                              | -0.76 |
| Galk1     | Galactokinase 1                                                                                                             | -0.76 |

|          |                                                                                                                                                                                                                                                                         |       |
|----------|-------------------------------------------------------------------------------------------------------------------------------------------------------------------------------------------------------------------------------------------------------------------------|-------|
| Lin9     | Lin-9 homolog ( <i>C. elegans</i> )                                                                                                                                                                                                                                     | -0.77 |
| Cat      | Catalase                                                                                                                                                                                                                                                                | -0.77 |
| Ranbp6   | RAN binding protein 6                                                                                                                                                                                                                                                   | -0.77 |
| Bcl2     | B-cell leukemia/lymphoma 2                                                                                                                                                                                                                                              | -0.77 |
| Ppp1r3c  | Protein phosphatase 1, regulatory (inhibitor) subunit 3C                                                                                                                                                                                                                | -0.77 |
| Zfp219   | Zinc finger protein 219                                                                                                                                                                                                                                                 | -0.77 |
| Prrx1    | Paired related homeobox 1                                                                                                                                                                                                                                               | -0.77 |
|          | Transcribed locus, moderately similar to XP_001106618.1 similar to<br>NADH dehydrogenase [ubiquinone] 1 beta subcomplex subunit 11,<br>mitochondrial precursor (NADH-ubiquinone oxidoreductase ESSS<br>subunit) (Complex I-ESSS) (CI-ESSS) (Neuronal protein 17.3) (p17 | -0.77 |
| Cnksr3   | Cnksr family member 3                                                                                                                                                                                                                                                   | -0.77 |
| Fads2    | Fatty acid desaturase 2                                                                                                                                                                                                                                                 | -0.77 |
| Plekhq1  | Pleckstrin homology domain containing, family Q member 1                                                                                                                                                                                                                | -0.77 |
| Tnfrsf1a | Tumor necrosis factor receptor superfamily, member 1a                                                                                                                                                                                                                   | -0.77 |
| Cmtm3    | CKLF-like MARVEL transmembrane domain containing 3                                                                                                                                                                                                                      | -0.77 |
| Clic4    | Chloride intracellular channel 4 (mitochondrial)                                                                                                                                                                                                                        | -0.78 |
|          | Transcribed locus, moderately similar to XP_001102188.1 similar to<br>peroxiredoxin 1 isoform 2 [ <i>Macaca mulatta</i> ]                                                                                                                                               | -0.78 |
| Mynn     | Myoneurin                                                                                                                                                                                                                                                               | -0.78 |
| Phkg1    | Phosphorylase kinase gamma 1                                                                                                                                                                                                                                            | -0.78 |
| Relt     | RELT tumor necrosis factor receptor                                                                                                                                                                                                                                     | -0.78 |
| Nfe2l2   | Nuclear factor, erythroid derived 2, like 2                                                                                                                                                                                                                             | -0.78 |
| Cyp4v3   | Cytochrome P450, family 4, subfamily v, polypeptide 3                                                                                                                                                                                                                   | -0.78 |
| Crtc3    | CREB regulated transcription coactivator 3                                                                                                                                                                                                                              | -0.78 |
| Kcnj9    | Potassium inwardly-rectifying channel, subfamily J, member 9                                                                                                                                                                                                            | -0.78 |
| Zfp760   | Zinc finger protein 760                                                                                                                                                                                                                                                 | -0.78 |
| Mtap     | Methylthioadenosine phosphorylase                                                                                                                                                                                                                                       | -0.78 |

|          |                                                                                                                         |       |
|----------|-------------------------------------------------------------------------------------------------------------------------|-------|
| Parvb    | Parvin, beta                                                                                                            | -0.79 |
| Fndc4    | Fibronectin type III domain containing 4                                                                                | -0.79 |
| Ammecr1  | Alport syndrome, mental retardation, midface hypoplasia and<br>elliptocytosis chromosomal region gene 1 homolog (human) | -0.79 |
| Chac1    | ChaC, cation transport regulator-like 1 (E. coli)                                                                       | -0.79 |
| Eif5a2   | Eukaryotic translation initiation factor 5A2                                                                            | -0.79 |
| Piga     | Phosphatidylinositol glycan anchor biosynthesis, class A                                                                | -0.79 |
| Efcab2   | EF-hand calcium binding domain 2                                                                                        | -0.79 |
| Slc25a24 | Solute carrier family 25 (mitochondrial carrier, phosphate carrier),<br>member 24                                       | -0.79 |
| Txlnb    | Taxilin beta                                                                                                            | -0.79 |
| Abca1    | ATP-binding cassette, sub-family A (ABC1), member 1                                                                     | -0.79 |
| Npas3    | Neuronal PAS domain protein 3                                                                                           | -0.79 |
| Xylt2    | Xylosyltransferase II                                                                                                   | -0.79 |
| Antxr1   | Anthrax toxin receptor 1                                                                                                | -0.79 |
| Cntfr    | Ciliary neurotrophic factor receptor                                                                                    | -0.79 |
| Cdh19    | Cadherin 19, type 2                                                                                                     | -0.80 |
| Cuedc1   | CUE domain containing 1                                                                                                 | -0.80 |
| Unc5b    | Unc-5 homolog B (C. elegans)                                                                                            | -0.80 |
| Rgma     | RGM domain family, member A                                                                                             | -0.80 |
| Ublcp1   | Ubiquitin-like domain containing CTD phosphatase 1                                                                      | -0.80 |
| Rac3     | RAS-related C3 botulinum substrate 3                                                                                    | -0.80 |
| Abcd1    | ATP-binding cassette, sub-family D (ALD), member 1                                                                      | -0.80 |
| Mpnd     | MPN domain containing                                                                                                   | -0.80 |
| Sema6a   | Sema domain, transmembrane domain (TM), and cytoplasmic domain,<br>(semaphorin) 6A                                      | -0.80 |
| Mxra8    | Matrix-remodelling associated 8                                                                                         | -0.80 |
| Slc37a2  | Solute carrier family 37 (glycerol-3-phosphate transporter), member 2                                                   | -0.81 |
| D4Ert22e | DNA segment, Chr 4, ERATO Doi 22, expressed                                                                             | -0.81 |

|          |                                                                                                                             |       |
|----------|-----------------------------------------------------------------------------------------------------------------------------|-------|
| Pmvk     | Phosphomevalonate kinase                                                                                                    | -0.81 |
| Tmem47   | Transmembrane protein 47                                                                                                    | -0.81 |
| Lyar     | Ly1 antibody reactive clone                                                                                                 | -0.81 |
| Sox9     | SRY-box containing gene 9                                                                                                   | -0.81 |
| Lrrc50   | Leucine rich repeat containing 50                                                                                           | -0.81 |
| Mtmr10   | Myotubularin related protein 10                                                                                             | -0.81 |
| Fbln5    | Fibulin 5                                                                                                                   | -0.81 |
| Pcdhb8   | Protocadherin beta 8                                                                                                        | -0.81 |
| Dock5    | Dedicator of cytokinesis 5                                                                                                  | -0.81 |
|          | Transcribed locus, weakly similar to XP_001111351.1 similar to<br>glutamate receptor 7 precursor isoform 2 [Macaca mulatta] | -0.81 |
| Nkx2-2   | NK2 transcription factor related, locus 2 (Drosophila)                                                                      | -0.81 |
| Tmem80   | Transmembrane protein 80                                                                                                    | -0.81 |
| Gpld1    | Glycosylphosphatidylinositol specific phospholipase D1                                                                      | -0.81 |
| AF529169 | CDNA sequence AF529169                                                                                                      | -0.81 |
| Lass2    | Longevity assurance homolog 2 (S. cerevisiae)                                                                               | -0.81 |
| T2bp     | Traf2 binding protein                                                                                                       | -0.81 |
| Zfp51    | Zinc finger protein 51                                                                                                      | -0.81 |
| Adamts1  | ADAMTS-like 1                                                                                                               | -0.81 |
| Klhl11   | Kelch-like 11 (Drosophila)                                                                                                  | -0.82 |
| Ifrg15   | Interferon alpha responsive gene                                                                                            | -0.82 |
| Rffl     | Ring finger and FYVE like domain containing protein                                                                         | -0.82 |
| Pea15a   | Phosphoprotein enriched in astrocytes 15A                                                                                   | -0.82 |
| Ifit2    | Interferon-induced protein with tetratricopeptide repeats 2                                                                 | -0.82 |
| Evc      | Ellis van Creveld gene homolog (human)                                                                                      | -0.82 |
| Ntsr2    | Neurotensin receptor 2                                                                                                      | -0.82 |
| Oxsr1    | Oxidative-stress responsive 1                                                                                               | -0.82 |
| Cd9      | CD9 antigen                                                                                                                 | -0.82 |
| Casz1    | Castor homolog 1, zinc finger (Drosophila)                                                                                  | -0.82 |
| Rnf13    | Ring finger protein 13                                                                                                      | -0.82 |

|         |                                                                           |       |
|---------|---------------------------------------------------------------------------|-------|
| Map3k1  | Mitogen activated protein kinase kinase kinase 1                          | -0.82 |
| Hr      | Hairless                                                                  | -0.82 |
| Nek11   | NIMA (never in mitosis gene a)-related expressed kinase 11                | -0.83 |
| March8  | Membrane-associated ring finger (C3HC4) 8                                 | -0.83 |
| Twistnb | TWIST neighbor                                                            | -0.83 |
| Lhfp13  | Lipoma HMGIC fusion partner-like 3                                        | -0.83 |
| Ubx4    | UBX domain containing 4                                                   | -0.83 |
|         | Transcribed locus, strongly similar to NP_001074866.1 heavy chain         |       |
|         | Myr 8 [Mus musculus]                                                      | -0.83 |
| Tacr3   | Tachykinin receptor 3                                                     | -0.83 |
| Gm266   | Gene model 266, (NCBI)                                                    | -0.83 |
| Dpyd    | Dihydropyrimidine dehydrogenase                                           | -0.83 |
| Btbd3   | BTB (POZ) domain containing 3                                             | -0.83 |
| Samd14  | Sterile alpha motif domain containing 14                                  | -0.83 |
| Cntn6   | Contactin 6                                                               | -0.83 |
| Dip2a   | DIP2 disco-interacting protein 2 homolog A (Drosophila)                   | -0.83 |
| G6pc3   | Glucose 6 phosphatase, catalytic, 3                                       | -0.83 |
| Phyh    | Phytanoyl-CoA hydroxylase                                                 | -0.84 |
| Ehd4    | EH-domain containing 4                                                    | -0.84 |
| Slc24a3 | Solute carrier family 24 (sodium/potassium/calcium exchanger), member 3   | -0.84 |
| Tgfb2   | Transforming growth factor, beta 2                                        | -0.84 |
| Rftn1   | Raftlin lipid raft linker 1                                               | -0.84 |
| Cln5    | Ceroid-lipofuscinosis, neuronal 5                                         | -0.84 |
| Slc12a2 | Solute carrier family 12, member 2                                        | -0.84 |
| F11r    | F11 receptor                                                              | -0.84 |
| Lrrc8a  | Leucine rich repeat containing 8A                                         | -0.84 |
| Cyp2j9  | Cytochrome P450, family 2, subfamily j, polypeptide 9                     | -0.84 |
| Nfatc3  | Nuclear factor of activated T-cells, cytoplasmic, calcineurin-dependent 3 | -0.84 |
| Cth     | Cystathionase (cystathionine gamma-lyase)                                 | -0.84 |

|          |                                                                                                                          |       |
|----------|--------------------------------------------------------------------------------------------------------------------------|-------|
| BC066107 | CDNA sequence BC066107                                                                                                   | -0.84 |
| Sqrdl    | Sulfide quinone reductase-like (yeast)                                                                                   | -0.84 |
| Scpep1   | Serine carboxypeptidase 1                                                                                                | -0.84 |
| Heatr5a  | HEAT repeat containing 5A                                                                                                | -0.84 |
| Sacm11   | SAC1 (suppressor of actin mutations 1, homolog)-like ( <i>S. cerevisiae</i> )                                            | -0.84 |
| Ldlrap1  | Low density lipoprotein receptor adaptor protein 1                                                                       | -0.84 |
|          | Transcribed locus, moderately similar to XP_001096448.1 similar to<br>F16A11.1 [ <i>Macaca mulatta</i> ]                 | -0.84 |
| Micall1  | Microtubule associated monooxygenase, calponin and LIM domain<br>containing -like 1                                      | -0.84 |
| Whdc1    | WAS protein homology region 2 domain containing 1                                                                        | -0.85 |
| Fhl1     | Four and a half LIM domains 1                                                                                            | -0.85 |
| Gpr64    | G protein-coupled receptor 64                                                                                            | -0.85 |
|          | Transcribed locus, moderately similar to XP_001059875.1 similar to<br>early B-cell factor 4 [ <i>Rattus norvegicus</i> ] | -0.85 |
| Egfl6    | EGF-like-domain, multiple 6                                                                                              | -0.85 |
| Gje1     | Gap junction membrane channel protein epsilon 1                                                                          | -0.85 |
|          | Transcribed locus, moderately similar to XP_001104482.1<br>apolipoprotein E [ <i>Macaca mulatta</i> ]                    | -0.85 |
| Tep1     | Telomerase associated protein 1                                                                                          | -0.85 |
| Lhx8     | LIM homeobox protein 8                                                                                                   | -0.85 |
| Sorbs3   | Sorbin and SH3 domain containing 3                                                                                       | -0.85 |
| Usp40    | Ubiquitin specific peptidase 40                                                                                          | -0.85 |
| Disp2    | Dispatched homolog 2 ( <i>Drosophila</i> )                                                                               | -0.85 |
| Man2b2   | Mannosidase 2, alpha B2                                                                                                  | -0.85 |
| Slc5a6   | Solute carrier family 5 (sodium-dependent vitamin transporter), member<br>6                                              | -0.86 |
| Pnpo     | Pyridoxine 5'-phosphate oxidase                                                                                          | -0.86 |
| Tgfb3    | Transforming growth factor, beta 3                                                                                       | -0.86 |

|            |                                                                                                                                       |       |
|------------|---------------------------------------------------------------------------------------------------------------------------------------|-------|
| Galnt6     | UDP-N-acetyl-alpha-D-galactosamine:polypeptide<br>N-acetylgalactosaminyltransferase 6                                                 | -0.86 |
| Spr        | Sepiapterin reductase                                                                                                                 | -0.86 |
| Myh14      | Myosin, heavy polypeptide 14                                                                                                          | -0.86 |
| AA960436   | Expressed sequence AA960436                                                                                                           | -0.86 |
| Fancm      | Fanconi anemia, complementation group M                                                                                               | -0.86 |
| Gins4      | GINS complex subunit 4 (Sld5 homolog)                                                                                                 | -0.86 |
| Lats2      | Large tumor suppressor 2                                                                                                              | -0.86 |
|            | Transcribed locus, strongly similar to XP_001104838.1 electron<br>transfer flavoprotein, alpha polypeptide isoform 2 [Macaca mulatta] | -0.86 |
| Plcl1      | Phospholipase C-like 1                                                                                                                | -0.86 |
| Ripk1      | Receptor (TNFRSF)-interacting serine-threonine kinase 1                                                                               | -0.86 |
| Tbc1d4     | TBC1 domain family, member 4                                                                                                          | -0.86 |
| Prmt2      | Protein arginine N-methyltransferase 2                                                                                                | -0.87 |
| Flt4       | FMS-like tyrosine kinase 4                                                                                                            | -0.87 |
| Tpm2       | Tropomyosin 2, beta                                                                                                                   | -0.87 |
| Lca5       | Leber congenital amaurosis 5 (human)                                                                                                  | -0.87 |
| Ctps2      | Cytidine 5'-triphosphate synthase 2                                                                                                   | -0.87 |
| Lonrf3     | LON peptidase N-terminal domain and ring finger 3                                                                                     | -0.87 |
| Nup50      | Nucleoporin 50                                                                                                                        | -0.87 |
| D16Ert472e | DNA segment, Chr 16, ERATO Doi 472, expressed                                                                                         | -0.87 |
| Necap2     | NECAP endocytosis associated 2                                                                                                        | -0.87 |
| Taf13      | TAF13 RNA polymerase II, TATA box binding protein (TBP)-associated<br>factor                                                          | -0.87 |
| Ache       | Acetylcholinesterase                                                                                                                  | -0.87 |
| Osbpl5     | Oxysterol binding protein-like 5                                                                                                      | -0.87 |
| Nudt1      | Nudix (nucleoside diphosphate linked moiety X)-type motif 1                                                                           | -0.88 |
| Gas6       | Growth arrest specific 6                                                                                                              | -0.88 |
| Nod1       | Nucleotide-binding oligomerization domain containing 1                                                                                | -0.88 |

|         |                                                                                                                                                                                                                                                                |       |
|---------|----------------------------------------------------------------------------------------------------------------------------------------------------------------------------------------------------------------------------------------------------------------|-------|
| March11 | Membrane-associated ring finger (C3HC4) 11                                                                                                                                                                                                                     | -0.88 |
|         | Transcribed locus, strongly similar to NP_037067.1 alpha B [Rattus norvegicus]                                                                                                                                                                                 | -0.88 |
|         | Transcribed locus, moderately similar to XP_001075241.1 similar to Phosphatidylinositol-4-phosphate 3-kinase C2 domain-containing alpha polypeptide (Phosphoinositide 3-Kinase-C2-alpha) (PtdIns-3-kinase C2 alpha) (PI3K-C2alpha) (Cpk-m) (p170) [Rattus norv | -0.88 |
| Timp2   | Tissue inhibitor of metalloproteinase 2                                                                                                                                                                                                                        | -0.88 |
| Tspan2  | Tetraspanin 2                                                                                                                                                                                                                                                  | -0.88 |
| Ttc21b  | Tetratricopeptide repeat domain 21B                                                                                                                                                                                                                            | -0.88 |
| Cdh20   | Cadherin 20                                                                                                                                                                                                                                                    | -0.88 |
| Triobp  | TRIO and F-actin binding protein                                                                                                                                                                                                                               | -0.88 |
| Sipa112 | Signal-induced proliferation-associated 1 like 2                                                                                                                                                                                                               | -0.88 |
| Gltf    | Glycolipid transfer protein                                                                                                                                                                                                                                    | -0.88 |
| Trdmt1  | TRNA aspartic acid methyltransferase 1                                                                                                                                                                                                                         | -0.88 |
| Mecr    | Mitochondrial trans-2-enoyl-CoA reductase                                                                                                                                                                                                                      | -0.89 |
| Il33    | Interleukin 33                                                                                                                                                                                                                                                 | -0.89 |
| Kcnn2   | Potassium intermediate/small conductance calcium-activated channel, subfamily N, member 2                                                                                                                                                                      | -0.89 |
| Podxl2  | Podocalyxin-like 2                                                                                                                                                                                                                                             | -0.89 |
| Gpr4    | G protein-coupled receptor 4                                                                                                                                                                                                                                   | -0.89 |
| Mipol1  | Mirror-image polydactyly gene 1 homolog (human)                                                                                                                                                                                                                | -0.89 |
| Ccdc82  | Coiled-coil domain containing 82                                                                                                                                                                                                                               | -0.89 |
| Acadvl  | Acyl-Coenzyme A dehydrogenase, very long chain                                                                                                                                                                                                                 | -0.89 |
| Sgsh    | N-sulfoglucosamine sulfohydrolase (sulfamidase)                                                                                                                                                                                                                | -0.89 |
| Tmem38b | Transmembrane protein 38B                                                                                                                                                                                                                                      | -0.89 |
| Rnh1    | Ribonuclease/angiogenin inhibitor 1                                                                                                                                                                                                                            | -0.89 |
| Tmem63a | Transmembrane protein 63a                                                                                                                                                                                                                                      | -0.89 |



|         |                                                                                                                                                                  |       |
|---------|------------------------------------------------------------------------------------------------------------------------------------------------------------------|-------|
| Hdx     | Highly divergent homeobox                                                                                                                                        | -0.89 |
| Tox3    | TOX high mobility group box family member 3                                                                                                                      | -0.89 |
| Pycl1   | Pyrroline-5-carboxylate reductase-like                                                                                                                           | -0.89 |
| Pcsk6   | Proprotein convertase subtilisin/kexin type 6                                                                                                                    | -0.89 |
|         | Transcribed locus, moderately similar to XP_221404.4 similar to Poly<br>[ADP-ribose] polymerase 9 (B aggressive lymphoma protein homolog)<br>[Rattus norvegicus] | -0.89 |
| Abhd5   | Abhydrolase domain containing 5                                                                                                                                  | -0.90 |
| Endod1  | Endonuclease domain containing 1                                                                                                                                 | -0.90 |
| Igfbp5  | Insulin-like growth factor binding protein 5                                                                                                                     | -0.90 |
| Fv1     | Friend virus susceptibility 1                                                                                                                                    | -0.90 |
| Lrrc2   | Leucine rich repeat containing 2                                                                                                                                 | -0.90 |
| Zc3hav1 | Zinc finger CCCH type, antiviral 1                                                                                                                               | -0.90 |
| Hspb6   | Heat shock protein, alpha-crystallin-related, B6                                                                                                                 | -0.90 |
| Odz1    | Odd Oz/ten-m homolog 1 (Drosophila)                                                                                                                              | -0.90 |
| Cgref1  | Cell growth regulator with EF hand domain 1                                                                                                                      | -0.91 |
| Otud7b  | OTU domain containing 7B                                                                                                                                         | -0.91 |
| Nat1    | N-acetyltransferase 1 (arylamine N-acetyltransferase)                                                                                                            | -0.91 |
| Ccdc134 | Coiled-coil domain containing 134                                                                                                                                | -0.91 |
| Lzts2   | Leucine zipper, putative tumor suppressor 2                                                                                                                      | -0.91 |
| Muted   | Muted                                                                                                                                                            | -0.91 |
| Olig1   | Oligodendrocyte transcription factor 1                                                                                                                           | -0.91 |
| Uck11   | Uridine-cytidine kinase 1-like 1                                                                                                                                 | -0.91 |
| Lifr    | Leukemia inhibitory factor receptor                                                                                                                              | -0.91 |
| Cyp27a1 | Cytochrome P450, family 27, subfamily a, polypeptide 1                                                                                                           | -0.91 |
| Hdac1   | Histone deacetylase 1                                                                                                                                            | -0.92 |
| Fahd2a  | Fumarylacetoacetate hydrolase domain containing 2A                                                                                                               | -0.92 |
| Zfp719  | Zinc finger protein 719                                                                                                                                          | -0.92 |
| Tubb3   | Tubulin, beta 3                                                                                                                                                  | -0.92 |

|           |                                                             |       |
|-----------|-------------------------------------------------------------|-------|
| Sept10    | Septin 10                                                   | -0.92 |
| Sgk2      | Serum/glucocorticoid regulated kinase 2                     | -0.92 |
| Calcr1    | Calcitonin receptor-like                                    | -0.92 |
| Padi2     | Peptidyl arginine deiminase, type II                        | -0.92 |
| Mrgpre    | MAS-related GPR, member E                                   | -0.92 |
| Camk2d    | Calcium/calmodulin-dependent protein kinase II, delta       | -0.92 |
| Prr13     | Proline rich 13                                             | -0.92 |
| Dusp16    | Dual specificity phosphatase 16                             | -0.93 |
| Bok       | Bcl-2-related ovarian killer protein                        | -0.93 |
| Rhog      | Ras homolog gene family, member G                           | -0.93 |
| Lcat      | Lecithin cholesterol acyltransferase                        | -0.93 |
| Wbp1      | WW domain binding protein 1                                 | -0.93 |
| Gjb6      | Gap junction protein, beta 6                                | -0.93 |
| Dlx2      | Distal-less homeobox 2                                      | -0.93 |
| Pnma3     | Paraneoplastic antigen MA3                                  | -0.93 |
| Rapgef3   | Rap guanine nucleotide exchange factor (GEF) 3              | -0.94 |
| Camk2n2   | Calcium/calmodulin-dependent protein kinase II inhibitor 2  | -0.94 |
| Nhs1l     | NHS-like 1                                                  | -0.94 |
| D1Ert471e | DNA segment, Chr 1, ERATO Doi 471, expressed                | -0.94 |
| Paip2     | Polyadenylate-binding protein-interacting protein 2         | -0.94 |
| Wdr6      | WD repeat domain 6                                          | -0.94 |
| Rreb1     | Ras responsive element binding protein 1                    | -0.94 |
| Serpinh1  | Serine (or cysteine) peptidase inhibitor, clade H, member 1 | -0.94 |
| Cdc42ep4  | CDC42 effector protein (Rho GTPase binding) 4               | -0.94 |
| Exosc3    | Exosome component 3                                         | -0.94 |
| Ocln      | Occludin                                                    | -0.94 |
| Fhit      | Fragile histidine triad gene                                | -0.95 |
| Tox2      | TOX high mobility group box family member 2                 | -0.95 |
| Plec1     | Plectin 1                                                   | -0.95 |
| Ttl5      | Tubulin tyrosine ligase-like family, member 5               | -0.95 |

|          |                                                                                                                                |       |
|----------|--------------------------------------------------------------------------------------------------------------------------------|-------|
| Atf7     | Activating transcription factor 7                                                                                              | -0.95 |
| Gnpnat1  | Glucosamine-phosphate N-acetyltransferase 1                                                                                    | -0.95 |
| Abhd3    | Abhydrolase domain containing 3                                                                                                | -0.95 |
| Mlc1     | Megalencephalic leukoencephalopathy with subcortical cysts 1 homolog<br>(human)                                                | -0.95 |
| Sparcl1  | SPARC-like 1 (mast9, hevin)                                                                                                    | -0.95 |
| Ammecr11 | AMME chromosomal region gene 1-like                                                                                            | -0.95 |
| Krcc1    | Lysine-rich coiled-coil 1                                                                                                      | -0.95 |
| Traf4    | Tnf receptor associated factor 4                                                                                               | -0.95 |
| Trip10   | Thyroid hormone receptor interactor 10                                                                                         | -0.95 |
| Trim25   | Tripartite motif protein 25                                                                                                    | -0.96 |
| Emb      | Embigin                                                                                                                        | -0.96 |
| Myo1d    | Myosin ID                                                                                                                      | -0.96 |
| Panx2    | Pannexin 2                                                                                                                     | -0.96 |
| Traf3ip2 | Traf3 interacting protein 2                                                                                                    | -0.96 |
| ErbB3    | V-erb-b2 erythroblastic leukemia viral oncogene homolog 3 (avian)                                                              | -0.96 |
| Bag3     | Bcl2-associated athanogene 3                                                                                                   | -0.96 |
| Zfp608   | Zinc finger protein 608                                                                                                        | -0.96 |
| Adi1     | Acireductone dioxygenase 1                                                                                                     | -0.96 |
| SyngR2   | Synaptogyrin 2                                                                                                                 | -0.96 |
| Gem      | GTP binding protein (gene overexpressed in skeletal muscle)                                                                    | -0.96 |
| Slc40a1  | Solute carrier family 40 (iron-regulated transporter), member 1                                                                | -0.96 |
| Ckap4    | Cytoskeleton-associated protein 4                                                                                              | -0.96 |
|          | Transcribed locus, moderately similar to XP_001114960.1 similar to<br>UPF0315 protein AD-001 [Macaca mulatta]                  | -0.97 |
| Stk32b   | Serine/threonine kinase 32B                                                                                                    | -0.97 |
| St3gal4  | ST3 beta-galactoside alpha-2,3-sialyltransferase 4                                                                             | -0.97 |
|          | 11 days embryo head cDNA, RIKEN full-length enriched library,<br>clone:6230413C19 product:unclassifiable, full insert sequence | -0.97 |

|          |                                                         |       |
|----------|---------------------------------------------------------|-------|
| Pvrl4    | Poliovirus receptor-related 4                           | -0.97 |
| Snrk     | SNF related kinase                                      | -0.97 |
| Sfmbt2   | Scm-like with four mbt domains 2                        | -0.97 |
| Dner     | Delta/notch-like EGF-related receptor                   | -0.97 |
| Gad1     | Glutamic acid decarboxylase 1                           | -0.97 |
| Fbxl21   | F-box and leucine-rich repeat protein 21                | -0.97 |
| Il1rap   | Interleukin 1 receptor accessory protein                | -0.98 |
| Mmp14    | Matrix metalloproteinase 14 (membrane-inserted)         | -0.98 |
| Efs      | Embryonal Fyn-associated substrate                      | -0.98 |
| Sgms2    | Sphingomyelin synthase 2                                | -0.98 |
| Tmem163  | Transmembrane protein 163                               | -0.98 |
| Nkx6-2   | NK6 transcription factor related, locus 2 (Drosophila)  | -0.98 |
| Pld1     | Phospholipase D1                                        | -0.98 |
| Echdc2   | Enoyl Coenzyme A hydratase domain containing 2          | -0.99 |
| Chchd8   | Coiled-coil-helix-coiled-coil-helix domain containing 8 | -0.99 |
| Eml3     | Echinoderm microtubule associated protein like 3        | -0.99 |
| Pltp     | Phospholipid transfer protein                           | -0.99 |
| Lhfp12   | Lipoma HMGIC fusion partner-like 2                      | -0.99 |
| Hapln4   | Hyaluronan and proteoglycan link protein 4              | -0.99 |
| Itga7    | Integrin alpha 7                                        | -0.99 |
| Tprkb    | Tp53 binding protein                                    | -0.99 |
| Ky       | Kyphoscoliosis peptidase                                | -0.99 |
| Usp6nl   | USP6 N-terminal like                                    | -0.99 |
| Tsku     | Tsukushin                                               | -0.99 |
| Fah      | Fumarylacetoacetate hydrolase                           | -1.00 |
| C1qtnf5  | C1q and tumor necrosis factor related protein 5         | -1.00 |
| M6prbp1  | Mannose-6-phosphate receptor binding protein 1          | -1.00 |
| BC022623 | CDNA sequence BC022623                                  | -1.00 |
| Ssbp1    | Single-stranded DNA binding protein 1                   | -1.00 |
| Id3      | Inhibitor of DNA binding 3                              | -1.00 |

|          |                                                                         |       |
|----------|-------------------------------------------------------------------------|-------|
| Fbxo39   | F-box protein 39                                                        | -1.00 |
| Arid5a   | AT rich interactive domain 5A (Mrf1 like)                               | -1.00 |
| Timp4    | Tissue inhibitor of metalloproteinase 4                                 | -1.00 |
| Gm962    | Gene model 962, (NCBI)                                                  | -1.01 |
| Smox     | Spermine oxidase                                                        | -1.01 |
| Zfp595   | Zin finger protein 595                                                  | -1.01 |
| Rassf8   | Ras association (RalGDS/AF-6) domain family 8                           | -1.01 |
| Car9     | Carbonic anhydrase 9                                                    | -1.01 |
| Trappc6a | Trafficking protein particle complex 6A                                 | -1.01 |
| Nudt7    | Nudix (nucleoside diphosphate linked moiety X)-type motif 7             | -1.01 |
| St3gal6  | ST3 beta-galactoside alpha-2,3-sialyltransferase 6                      | -1.01 |
| Kif1c    | Kinesin family member 1C                                                | -1.01 |
| Ndrp2    | N-myc downstream regulated gene 2                                       | -1.01 |
| Zswim3   | Zinc finger, SWIM domain containing 3                                   | -1.01 |
| Gale     | Galactose-4-epimerase, UDP                                              | -1.02 |
| Psd2     | Pleckstrin and Sec7 domain containing 2                                 | -1.02 |
| Megf11   | Multiple EGF-like-domains 11                                            | -1.02 |
| Rfx2     | Regulatory factor X, 2 (influences HLA class II expression)             | -1.02 |
| Akna     | AT-hook transcription factor                                            | -1.02 |
| Dock2    | Dedicator of cyto-kinesis 2                                             | -1.02 |
| Ppargc1a | Peroxisome proliferative activated receptor, gamma, coactivator 1 alpha | -1.02 |
| Acot7    | Acyl-CoA thioesterase 7                                                 | -1.02 |
| Rnf144b  | Ring finger protein 144B                                                | -1.02 |
| Arl4c    | ADP-ribosylation factor-like 4C                                         | -1.03 |
| Mal      | Myelin and lymphocyte protein, T-cell differentiation protein           | -1.03 |
| Csrp1    | Cysteine and glycine-rich protein 1                                     | -1.03 |
| Arhgap28 | Rho GTPase activating protein 28                                        | -1.03 |
| Edg8     | Endothelial differentiation, sphingolipid G-protein-coupled receptor, 8 | -1.03 |
| Rnf182   | Ring finger protein 182                                                 | -1.03 |
|          | Transcribed locus, moderately similar to NP_956426.2 channel,           | -1.03 |

|         |                                                                                                             |       |
|---------|-------------------------------------------------------------------------------------------------------------|-------|
|         | voltage-gated, type I, alpha [Danio rerio]                                                                  |       |
| Zfp488  | Zinc finger protein 488                                                                                     | -1.03 |
| Gpr98   | G protein-coupled receptor 98                                                                               | -1.03 |
| Foxn3   | Forkhead box N3                                                                                             | -1.03 |
| Slc39a8 | Solute carrier family 39 (metal ion transporter), member 8                                                  | -1.03 |
| Sntb1   | Syntrophin, basic 1                                                                                         | -1.04 |
| Rps6ka1 | Ribosomal protein S6 kinase polypeptide 1                                                                   | -1.04 |
| Aurka   | Aurora kinase A                                                                                             | -1.04 |
| Cldn14  | Claudin 14                                                                                                  | -1.04 |
| Kcnc4   | Potassium voltage gated channel, Shaw-related subfamily, member 4                                           | -1.04 |
| Trabd   | TraB domain containing                                                                                      | -1.04 |
| Mab2112 | Mab-21-like 2 (C. elegans)                                                                                  | -1.05 |
| Itga3   | Integrin alpha 3                                                                                            | -1.05 |
| Scn9a   | Sodium channel, voltage-gated, type IX, alpha                                                               | -1.05 |
| Pgpep1  | Pyroglutamyl-peptidase I                                                                                    | -1.05 |
| Rest    | RE1-silencing transcription factor                                                                          | -1.05 |
| Tgfbr2  | Transforming growth factor, beta receptor II                                                                | -1.05 |
| Als2cl  | ALS2 C-terminal like                                                                                        | -1.05 |
| Vegfa   | Vascular endothelial growth factor A                                                                        | -1.05 |
| Aph1a   | Anterior pharynx defective 1a homolog (C. elegans)                                                          | -1.05 |
| Abhd4   | Abhydrolase domain containing 4                                                                             | -1.06 |
|         | Transcribed locus, weakly similar to XP_001092629.1 similar to<br>chromogranin A precursor [Macaca mulatta] | -1.06 |
| Xrcc2   | X-ray repair complementing defective repair in Chinese hamster cells 2                                      | -1.06 |
| Gal3st1 | Galactose-3-O-sulfotransferase 1                                                                            | -1.06 |
| Tirap   | Toll-interleukin 1 receptor (TIR) domain-containing adaptor protein                                         | -1.06 |
| Gpr103  | G protein-coupled receptor 103                                                                              | -1.06 |
| Steap1  | Six transmembrane epithelial antigen of the prostate 1                                                      | -1.06 |
| Cmb1    | Carboxymethylenebutenolidase-like (Pseudomonas)                                                             | -1.07 |

|         |                                                                                                                      |       |
|---------|----------------------------------------------------------------------------------------------------------------------|-------|
| Hcn3    | Hyperpolarization-activated, cyclic nucleotide-gated K+ 3                                                            | -1.07 |
| Csk     | C-src tyrosine kinase                                                                                                | -1.07 |
| Rhobtb3 | Rho-related BTB domain containing 3                                                                                  | -1.07 |
| Cdc25a  | Cell division cycle 25 homolog A ( <i>S. pombe</i> )                                                                 | -1.07 |
| Tmbim1  | Transmembrane BAX inhibitor motif containing 1                                                                       | -1.07 |
| Qdpr    | Quinoid dihydropteridine reductase                                                                                   | -1.07 |
| Sepp1   | Selenoprotein P, plasma, 1                                                                                           | -1.07 |
| Tdrd3   | Tudor domain containing 3                                                                                            | -1.07 |
| Slc4a2  | Solute carrier family 4 (anion exchanger), member 2                                                                  | -1.07 |
| Zcchc16 | Zinc finger, CCHC domain containing 16                                                                               | -1.07 |
| Slc10a7 | Solute carrier family 10 (sodium/bile acid cotransporter family), member<br>7                                        | -1.07 |
| Comtd1  | Catechol-O-methyltransferase domain containing 1                                                                     | -1.07 |
| Thnsl2  | Threonine synthase-like 2 (bacterial)                                                                                | -1.07 |
| Pnp     | Purine-nucleoside phosphorylase                                                                                      | -1.08 |
| Sdsl    | Serine dehydratase-like                                                                                              | -1.08 |
|         | Transcribed locus, moderately similar to XP_001068349.1 similar to<br>Nucleoporin Nup43 [ <i>Rattus norvegicus</i> ] | -1.08 |
| Pacsin2 | Protein kinase C and casein kinase substrate in neurons 2                                                            | -1.08 |
|         | Transcribed locus, weakly similar to XP_001111245.1 CD63 molecule<br>isoform 2 [ <i>Macaca mulatta</i> ]             | -1.08 |
| Anln    | Anillin, actin binding protein (scraps homolog, <i>Drosophila</i> )                                                  | -1.08 |
| Fgfr1op | Fgfr1 oncogene partner                                                                                               | -1.08 |
| Tspan4  | Tetraspanin 4                                                                                                        | -1.08 |
| Nsun7   | NOL1/NOP2/Sun domain family, member 7                                                                                | -1.08 |
| Ghdc    | GH3 domain containing                                                                                                | -1.08 |
| Coro6   | Coronin, actin binding protein 6                                                                                     | -1.08 |
| Spag5   | Sperm associated antigen 5                                                                                           | -1.08 |
| Tmc6    | Transmembrane channel-like gene family 6                                                                             | -1.08 |

|         |                                                                                                                                      |       |
|---------|--------------------------------------------------------------------------------------------------------------------------------------|-------|
| Fgf1    | Fibroblast growth factor 1                                                                                                           | -1.08 |
| Flvcr1  | Feline leukemia virus subgroup C cellular receptor 1                                                                                 | -1.08 |
| Anub11  | AN1, ubiquitin-like, homolog ( <i>Xenopus laevis</i> )                                                                               | -1.08 |
| Mcam    | Melanoma cell adhesion molecule                                                                                                      | -1.09 |
| Phldb1  | Pleckstrin homology-like domain, family B, member 1                                                                                  | -1.09 |
| Zfp677  | Zinc finger protein 677                                                                                                              | -1.09 |
| Tgm4    | Transglutaminase 4 (prostate)                                                                                                        | -1.09 |
| Foxo4   | Forkhead box O4                                                                                                                      | -1.09 |
| Hadhb   | Hydroxyacyl-Coenzyme A dehydrogenase/3-ketoacyl-Coenzyme A thiolase/enoyl-Coenzyme A hydratase (trifunctional protein), beta subunit | -1.09 |
| Frs3    | Fibroblast growth factor receptor substrate 3                                                                                        | -1.09 |
| Rnf122  | Ring finger protein 122                                                                                                              | -1.09 |
| Tpk1    | Thiamine pyrophosphokinase                                                                                                           | -1.09 |
| Gins3   | GINS complex subunit 3 (Psf3 homolog)                                                                                                | -1.09 |
| Ugt8a   | UDP galactosyltransferase 8A                                                                                                         | -1.09 |
| Hhat1   | Hedgehog acyltransferase-like                                                                                                        | -1.09 |
| Pcdhb4  | Protocadherin beta 4                                                                                                                 | -1.10 |
| Dhfr    | Dihydrofolate reductase                                                                                                              | -1.10 |
| Rsrc1   | Arginine/serine-rich coiled-coil 1                                                                                                   | -1.10 |
| Nkain1  | Na <sup>+</sup> /K <sup>+</sup> transporting ATPase interacting 1                                                                    | -1.10 |
| Tmem10  | Transmembrane protein 10                                                                                                             | -1.10 |
| Itga4   | Integrin alpha 4                                                                                                                     | -1.10 |
| Slc1a6  | Solute carrier family 1 (high affinity aspartate/glutamate transporter), member 6                                                    | -1.10 |
| Anks1   | Ankyrin repeat and SAM domain containing 1                                                                                           | -1.10 |
| Scd1    | Stearoyl-Coenzyme A desaturase 1                                                                                                     | -1.10 |
| Scd3    | Stearoyl-coenzyme A desaturase 3                                                                                                     | -1.11 |
| Stxbp3b | Syntaxin-binding protein 3B                                                                                                          | -1.11 |
| Ebf2    | Early B-cell factor 2                                                                                                                | -1.11 |



|          |                                                                              |       |
|----------|------------------------------------------------------------------------------|-------|
| Diras1   | DIRAS family, GTP-binding RAS-like 1                                         | -1.11 |
| Zbtb7b   | Zinc finger and BTB domain containing 7B                                     | -1.11 |
| Ctnnbip1 | Catenin beta interacting protein 1                                           | -1.11 |
| Cygb     | Cytoglobin                                                                   | -1.11 |
| Ednrb    | Endothelin receptor type B                                                   | -1.11 |
| Dab2     | Disabled homolog 2 (Drosophila)                                              | -1.12 |
| Zfp804a  | Zinc finger protein 804A                                                     | -1.12 |
| Prkd2    | Protein kinase D2                                                            | -1.12 |
| Fem1c    | Fem-1 homolog c (C.elegans)                                                  | -1.12 |
| Zfp36l2  | Zinc finger protein 36, C3H type-like 2                                      | -1.12 |
| Kcns3    | Potassium voltage-gated channel, delayed-rectifier, subfamily S, member<br>3 | -1.13 |
| Dbndd1   | Dysbindin (dystrobrevin binding protein 1) domain containing 1               | -1.13 |
| Aqp4     | Aquaporin 4                                                                  | -1.13 |
| Grip2    | Glutamate receptor interacting protein 2                                     | -1.13 |
| Tnfaip6  | Tumor necrosis factor alpha induced protein 6                                | -1.13 |
| Elovl7   | ELOVL family member 7, elongation of long chain fatty acids (yeast)          | -1.13 |
| Gprc5b   | G protein-coupled receptor, family C, group 5, member B                      | -1.13 |
| Btbd14a  | BTB (POZ) domain containing 14A                                              | -1.13 |
| Tulp3    | Tubby-like protein 3                                                         | -1.13 |
| Cldn11   | Claudin 11                                                                   | -1.13 |
| Txnrd3   | Thioredoxin reductase 3                                                      | -1.13 |
| Irf3     | Interferon regulatory factor 3                                               | -1.14 |
| Rilp     | Rab interacting lysosomal protein                                            | -1.14 |
| Itgb4    | Integrin beta 4                                                              | -1.14 |
| Gpr153   | G protein-coupled receptor 153                                               | -1.14 |
| Trp53i13 | Transformation related protein 53 inducible protein 13                       | -1.14 |
| Zfp300   | Zinc finger protein 300                                                      | -1.14 |
| Zfp36l1  | Zinc finger protein 36, C3H type-like 1                                      | -1.14 |
| Bambi    | BMP and activin membrane-bound inhibitor, homolog (Xenopus laevis)           | -1.14 |

|              |                                                                                    |       |
|--------------|------------------------------------------------------------------------------------|-------|
| Cited2       | Cbp/p300-interacting transactivator, with Glu/Asp-rich carboxy-terminal domain, 2  | -1.15 |
| Cables2      | Cdk5 and Abl enzyme substrate 2                                                    | -1.15 |
| Efemp2       | Epidermal growth factor-containing fibulin-like extracellular matrix protein 2     | -1.15 |
| Chml         | Choroideremia-like                                                                 | -1.15 |
| Cwf19l2      | CWF19-like 2, cell cycle control ( <i>S. pombe</i> )                               | -1.15 |
| Cnp          | 2',3'-cyclic nucleotide 3' phosphodiesterase                                       | -1.15 |
| Myo1f        | Myosin IF                                                                          | -1.15 |
| Ccdc108      | Coiled-coil domain containing 108                                                  | -1.15 |
| Slc25a18     | Solute carrier family 25 (mitochondrial carrier), member 18                        | -1.15 |
| Emid2        | EMI domain containing 2                                                            | -1.16 |
| Ttyh2        | Tweety homolog 2 ( <i>Drosophila</i> )                                             | -1.16 |
| Intu         | Inturned planar cell polarity effector homolog ( <i>Drosophila</i> )               | -1.16 |
| MacroD1      | MACRO domain containing 1                                                          | -1.16 |
| Plce1        | Phospholipase C, epsilon 1                                                         | -1.16 |
| Efcab1       | EF hand calcium binding domain 1                                                   | -1.16 |
| Ptprd        | Protein tyrosine phosphatase, receptor type, D                                     | -1.16 |
| Amn          | Amnionless                                                                         | -1.16 |
| S100b        | S100 protein, beta polypeptide, neural                                             | -1.16 |
| Nkx2-1       | NK2 homeobox 1                                                                     | -1.16 |
| Rhbdf2       | Rhomboid 5 homolog 2 ( <i>Drosophila</i> )                                         | -1.16 |
| LOC100041985 | Similar to Capping protein (actin filament) muscle Z-line, alpha 1                 | -1.16 |
| Elavl4       | ELAV (embryonic lethal, abnormal vision, <i>Drosophila</i> )-like 4 (Hu antigen D) | -1.16 |
|              | Transcribed locus, moderately similar to XP_001086547.1                            |       |
|              | mitochondrial trifunctional protein, beta subunit [ <i>Macaca mulatta</i> ]        | -1.16 |
| Prkcd        | Protein kinase C, delta                                                            | -1.17 |
| Pvr12        | Poliovirus receptor-related 2                                                      | -1.17 |

|           |                                                                                    |       |
|-----------|------------------------------------------------------------------------------------|-------|
| Pcolce2   | Procollagen C-endopeptidase enhancer 2                                             | -1.17 |
| Zdhhc22   | Zinc finger, DHHC-type containing 22                                               | -1.17 |
| Sgol2     | Shugoshin-like 2 (S. pombe)                                                        | -1.17 |
| Srebf1    | Sterol regulatory element binding factor 1                                         | -1.17 |
| Cd274     | CD274 antigen                                                                      | -1.17 |
| Apod      | Apolipoprotein D                                                                   | -1.17 |
| Pigh      | Phosphatidylinositol glycan anchor biosynthesis, class H                           | -1.18 |
| Abca7     | ATP-binding cassette, sub-family A (ABC1), member 7                                | -1.18 |
| Kif19a    | Kinesin family member 19A                                                          | -1.18 |
| Adssl1    | Adenylosuccinate synthetase like 1                                                 | -1.18 |
| BC067074  | CDNA sequence BC067074                                                             | -1.18 |
| Gprc5c    | G protein-coupled receptor, family C, group 5, member C                            | -1.18 |
| Igsf3     | Immunoglobulin superfamily, member 3                                               | -1.18 |
| Epb4.114a | Erythrocyte protein band 4.1-like 4a                                               | -1.18 |
| Olfir1344 | Olfactory receptor 1344                                                            | -1.18 |
| Smo       | Smoothened homolog (Drosophila)                                                    | -1.18 |
| Edg7      | Endothelial differentiation, lysophosphatidic acid G-protein-coupled<br>receptor 7 | -1.19 |
| Tmem98    | Transmembrane protein 98                                                           | -1.19 |
| Phca      | Phytoceramidase, alkaline                                                          | -1.19 |
| Defb42    | Defensin beta 42                                                                   | -1.19 |
| Trim21    | Tripartite motif protein 21                                                        | -1.19 |
| Hspa12b   | Heat shock protein 12B                                                             | -1.19 |
| Cacna1g   | Calcium channel, voltage-dependent, T type, alpha 1G subunit                       | -1.19 |
| Klhl4     | Kelch-like 4 (Drosophila)                                                          | -1.20 |
| Sertad3   | SERTA domain containing 3                                                          | -1.20 |
| Mmp15     | Matrix metalloproteinase 15                                                        | -1.20 |
| Anxa5     | Annexin A5                                                                         | -1.20 |
| Atp10a    | ATPase, class V, type 10A                                                          | -1.20 |
| St8sia1   | ST8 alpha-N-acetyl-neuraminide alpha-2,8-sialyltransferase 1                       | -1.20 |

|         |                                                                          |       |
|---------|--------------------------------------------------------------------------|-------|
| Ankrd38 | Ankyrin repeat domain 38                                                 | -1.20 |
| Ucp2    | Uncoupling protein 2 (mitochondrial, proton carrier)                     | -1.21 |
| Thoc6   | THO complex 6 homolog (Drosophila)                                       | -1.21 |
| Fgd3    | FYVE, RhoGEF and PH domain containing 3                                  | -1.21 |
| Iqcd    | IQ motif containing D                                                    | -1.21 |
| Rims3   | Regulating synaptic membrane exocytosis 3                                | -1.21 |
| Taf7    | TAF7 RNA polymerase II, TATA box binding protein (TBP)-associated factor | -1.21 |
| Prokr2  | Prokineticin receptor 2                                                  | -1.21 |
| Ccdc65  | Coiled-coil domain containing 65                                         | -1.21 |
| Sfrs17b | Splicing factor, arginine/serine-rich 17b                                | -1.21 |
| Morn2   | MORN repeat containing 2                                                 | -1.22 |
| Kcnj10  | Potassium inwardly-rectifying channel, subfamily J, member 10            | -1.22 |
| Syde1   | Synapse defective 1, Rho GTPase, homolog 1 (C. elegans)                  | -1.22 |
| Pib5pa  | Phosphatidylinositol (4,5) bisphosphate 5-phosphatase, A                 | -1.22 |
| Resp18  | Regulated endocrine-specific protein 18                                  | -1.22 |
| Blm     | Bloom syndrome homolog (human)                                           | -1.22 |
| Unc119  | Unc-119 homolog (C. elegans)                                             | -1.22 |
| Lgi2    | Leucine-rich repeat LGI family, member 2                                 | -1.22 |
| Nkd1    | Naked cuticle 1 homolog (Drosophila)                                     | -1.22 |
| Dapk2   | Death-associated kinase 2                                                | -1.22 |
| Card14  | Caspase recruitment domain family, member 14                             | -1.23 |
| Whrn    | Whirlin                                                                  | -1.23 |
| Prkcq   | Protein kinase C, theta                                                  | -1.23 |
| Fer113  | Fer-1-like 3, myoferlin (C. elegans)                                     | -1.23 |
| Ddefl1  | Development and differentiation enhancing factor-like 1                  | -1.23 |
| Spag6   | Sperm associated antigen 6                                               | -1.23 |
| Fbx18   | F-box and leucine-rich repeat protein 8                                  | -1.23 |
| Fzd1    | Frizzled homolog 1 (Drosophila)                                          | -1.23 |
| Phactr2 | Phosphatase and actin regulator 2                                        | -1.23 |

|          |                                                                                    |       |
|----------|------------------------------------------------------------------------------------|-------|
| Arsg     | Arylsulfatase G                                                                    | -1.24 |
| Mcf2     | Mcf.2 transforming sequence                                                        | -1.24 |
| Efhd1    | EF hand domain containing 1                                                        | -1.24 |
| Mobk12c  | MOB1, Mps One Binder kinase activator-like 2C (yeast)                              | -1.24 |
| Mtss1    | Metastasis suppressor 1                                                            | -1.24 |
| Zfp395   | Zinc finger protein 395                                                            | -1.24 |
| Lrig1    | Leucine-rich repeats and immunoglobulin-like domains 1                             | -1.24 |
| Arhgef10 | Rho guanine nucleotide exchange factor (GEF) 10                                    | -1.25 |
| Oplah    | 5-oxoprolinase (ATP-hydrolysing)                                                   | -1.25 |
| Casp3    | Caspase 3                                                                          | -1.25 |
| Acrbp    | Proacrosin binding protein                                                         | -1.25 |
| Pard3b   | Par-3 partitioning defective 3 homolog B ( <i>C. elegans</i> )                     | -1.25 |
| Tuft1    | Tuftelin 1                                                                         | -1.25 |
| Slc5a5   | Solute carrier family 5 (sodium iodide symporter), member 5                        | -1.25 |
| Cit      | Citron                                                                             | -1.25 |
| Optn     | Optineurin                                                                         | -1.25 |
| Frmf5    | FERM domain containing 5                                                           | -1.25 |
| Trpv4    | Transient receptor potential cation channel, subfamily V, member 4                 | -1.26 |
| Eps8     | Epidermal growth factor receptor pathway substrate 8                               | -1.26 |
| Rnf43    | Ring finger protein 43                                                             | -1.26 |
| Dpysl3   | Dihydropyrimidinase-like 3                                                         | -1.26 |
| Elavl2   | ELAV (embryonic lethal, abnormal vision, <i>Drosophila</i> )-like 2 (Hu antigen B) | -1.26 |
| Adora2b  | Adenosine A2b receptor                                                             | -1.26 |
| Ysk4     | Yeast Sps1/Ste20-related kinase 4 ( <i>S. cerevisiae</i> )                         | -1.26 |
| Ticam2   | Toll-like receptor adaptor molecule 2                                              | -1.27 |
| Pla2g7   | Phospholipase A2, group VII (platelet-activating factor acetylhydrolase, plasma)   | -1.27 |
| Mag      | Myelin-associated glycoprotein                                                     | -1.27 |
| Dnali1   | Dynein, axonemal, light intermediate polypeptide 1                                 | -1.27 |

|          |                                                                     |       |
|----------|---------------------------------------------------------------------|-------|
| Nxph1    | Neurexophilin 1                                                     | -1.27 |
| Gjc2     | Gap junction protein, chi 2                                         | -1.27 |
| Ahnak2   | AHNAK nucleoprotein 2                                               | -1.27 |
| Scnn1a   | Sodium channel, nonvoltage-gated, type I, alpha                     | -1.27 |
| Ascc1    | Activating signal cointegrator 1 complex subunit 1                  | -1.28 |
| Ppp1r3b  | Protein phosphatase 1, regulatory (inhibitor) subunit 3B            | -1.28 |
| Afmid    | Arylformamidase                                                     | -1.28 |
| Top3a    | Topoisomerase (DNA) III alpha                                       | -1.28 |
| Adarb1   | Adenosine deaminase, RNA-specific, B1                               | -1.28 |
| Dgkk     | Diacylglycerol kinase kappa                                         | -1.28 |
| Plcb4    | Phospholipase C, beta 4                                             | -1.29 |
| Tppp3    | Tubulin polymerization-promoting protein family member 3            | -1.29 |
| Slc39a12 | Solute carrier family 39 (zinc transporter), member 12              | -1.29 |
| Plekhb1  | Pleckstrin homology domain containing, family B (evectins) member 1 | -1.29 |
| Nup54    | Nucleoporin 54                                                      | -1.29 |
| Lgi3     | Leucine-rich repeat LGI family, member 3                            | -1.29 |
| Pygm     | Muscle glycogen phosphorylase                                       | -1.29 |
| Sox10    | SRY-box containing gene 10                                          | -1.29 |
| Ifi35    | Interferon-induced protein 35                                       | -1.29 |
| Ppap2c   | Phosphatidic acid phosphatase type 2c                               | -1.29 |
| Frem1    | Fras1 related extracellular matrix protein 1                        | -1.29 |
| Prelp    | Proline arginine-rich end leucine-rich repeat                       | -1.30 |
| Cab39l   | Calcium binding protein 39-like                                     | -1.30 |
| Mdfic    | MyoD family inhibitor domain containing                             | -1.30 |
| Ttc30a1  | Tetratricopeptide repeat domain 30A1                                | -1.30 |
| Rgs3     | Regulator of G-protein signaling 3                                  | -1.30 |
| Bcat1    | Branched chain aminotransferase 1, cytosolic                        | -1.30 |
| BC022224 | CDNA sequence BC022224                                              | -1.30 |
| Mog      | Myelin oligodendrocyte glycoprotein                                 | -1.30 |
| Palm2    | Paralemmin 2                                                        | -1.30 |

|          |                                                                                               |       |
|----------|-----------------------------------------------------------------------------------------------|-------|
| Kctd15   | Potassium channel tetramerisation domain containing 15                                        | -1.31 |
| Apob48r  | Apolipoprotein B48 receptor                                                                   | -1.31 |
| Gna15    | Guanine nucleotide binding protein, alpha 15                                                  | -1.31 |
| Mical2   | MICAL-like 2                                                                                  | -1.31 |
| Svil     | Supervillin                                                                                   | -1.31 |
| Opn3     | Opsin (encephalopsin)                                                                         | -1.31 |
| Fndc5    | Fibronectin type III domain containing 5                                                      | -1.31 |
| Cdc42ep1 | CDC42 effector protein (Rho GTPase binding) 1                                                 | -1.31 |
| Zfp385   | Zinc finger protein 385                                                                       | -1.31 |
| Steap2   | Six transmembrane epithelial antigen of prostate 2                                            | -1.31 |
| Dll1     | Delta-like 1 (Drosophila)                                                                     | -1.32 |
| Fadd     | Fas (TNFRSF6)-associated via death domain                                                     | -1.32 |
| Dmrta2   | Doublesex and mab-3 related transcription factor like family A2                               | -1.32 |
| Nrbp2    | Nuclear receptor binding protein 2                                                            | -1.33 |
| Adamts4  | A disintegrin-like and metallopeptidase (reprolysin type) with thrombospondin type 1 motif, 4 | -1.33 |
| Mdh1b    | Malate dehydrogenase 1B, NAD (soluble)                                                        | -1.33 |
| Dmpk     | Dystrophia myotonica-protein kinase                                                           | -1.33 |
| Casp8    | Caspase 8                                                                                     | -1.33 |
| Rad51c   | Rad51 homolog c ( <i>S. cerevisiae</i> )                                                      | -1.33 |
| Abhd14b  | Abhydrolase domain containing 14b                                                             | -1.33 |
| Vipr2    | Vasoactive intestinal peptide receptor 2                                                      | -1.33 |
| Tlr2     | Toll-like receptor 2                                                                          | -1.34 |
| St5      | Suppression of tumorigenicity 5                                                               | -1.34 |
| Hps6     | Hermansky-Pudlak syndrome 6                                                                   | -1.35 |
| BC057371 | CDNA sequence BC057371                                                                        | -1.35 |
| Ankrd15  | Ankyrin repeat domain 15                                                                      | -1.35 |
| Clcn5    | Chloride channel 5                                                                            | -1.35 |
| Chek2    | CHK2 checkpoint homolog ( <i>S. pombe</i> )                                                   | -1.35 |
| Ctnnal1  | Catenin (cadherin associated protein), alpha-like 1                                           | -1.35 |

|          |                                                                                 |       |
|----------|---------------------------------------------------------------------------------|-------|
| Sh3bgr12 | SH3 domain binding glutamic acid-rich protein like 2                            | -1.35 |
| Fgl2     | Fibrinogen-like protein 2                                                       | -1.36 |
| Trf      | Transferrin                                                                     | -1.36 |
| Angpt1   | Angiopoietin 1                                                                  | -1.36 |
| Zfp217   | Zinc finger protein 217                                                         | -1.36 |
| Gm1614   | Gene model 1614, (NCBI)                                                         | -1.36 |
| Rgs6     | Regulator of G-protein signaling 6                                              | -1.36 |
| Myo1e    | Myosin IE                                                                       | -1.37 |
| Sfrp2    | Secreted frizzled-related protein 2                                             | -1.37 |
| Gdf11    | Growth differentiation factor 11                                                | -1.37 |
| Zscan29  | Zinc finger SCAN domains 29                                                     | -1.37 |
| Armc3    | Armadillo repeat containing 3                                                   | -1.37 |
| Pnoc     | Prepronociceptin                                                                | -1.37 |
| Ndst3    | N-deacetylase/N-sulfotransferase (heparan glucosaminyl) 3                       | -1.38 |
| Mccc1    | Methylcrotonoyl-Coenzyme A carboxylase 1 (alpha)                                | -1.38 |
| Vash2    | Vasohibin 2                                                                     | -1.39 |
| Hey2     | Hairy/enhancer-of-split related with YRPW motif 2                               | -1.39 |
| Plekhh1  | Pleckstrin homology domain containing, family H (with MyTH4 domain)<br>member 1 | -1.39 |
| Tdrd1    | Tudor domain containing 1                                                       | -1.39 |
| Prr18    | Proline rich region 18                                                          | -1.39 |
| Gm410    | Gene model 410, (NCBI)                                                          | -1.39 |
| Cib2     | Calcium and integrin binding family member 2                                    | -1.39 |
| Rdh5     | Retinol dehydrogenase 5                                                         | -1.39 |
| Nudt12   | Nudix (nucleoside diphosphate linked moiety X)-type motif 12                    | -1.40 |
| Zfp423   | Zinc finger protein 423                                                         | -1.40 |
| Cerk     | Ceramide kinase                                                                 | -1.40 |
| Mobp     | Myelin-associated oligodendrocytic basic protein                                | -1.40 |
| Evi2a    | Ecotropic viral integration site 2a                                             | -1.40 |
| Wnt5a    | Wingless-related MMTV integration site 5A                                       | -1.40 |



|           |                                                                                                                                     |       |
|-----------|-------------------------------------------------------------------------------------------------------------------------------------|-------|
| Irs1      | Insulin receptor substrate 1                                                                                                        | -1.41 |
| Car14     | Carbonic anhydrase 14                                                                                                               | -1.41 |
| Lrguk     | Leucine-rich repeats and guanylate kinase domain containing                                                                         | -1.41 |
| Stk33     | Serine/threonine kinase 33                                                                                                          | -1.41 |
| Cc2d1b    | Coiled-coil and C2 domain containing 1B                                                                                             | -1.41 |
| LOC666244 | Thymosin beta-like                                                                                                                  | -1.41 |
| Acan      | Aggrecan                                                                                                                            | -1.42 |
| Pecr      | Peroxisomal trans-2-enoyl-CoA reductase                                                                                             | -1.42 |
| Rph3al    | Rabphilin 3A-like (without C2 domains)                                                                                              | -1.42 |
| Ppapdc1a  | Phosphatidic acid phosphatase type 2 domain containing 1A                                                                           | -1.42 |
| Ctf1      | Cardiotrophin 1                                                                                                                     | -1.42 |
| Mbp       | Myelin basic protein                                                                                                                | -1.42 |
| Sox18     | SRY-box containing gene 18                                                                                                          | -1.42 |
| Capg      | Capping protein (actin filament), gelsolin-like                                                                                     | -1.42 |
| Vit       | Vitrin                                                                                                                              | -1.43 |
| Tmem22    | Transmembrane protein 22                                                                                                            | -1.43 |
| Gpr123    | G protein-coupled receptor 123                                                                                                      | -1.43 |
| Rnaset2a  | Ribonuclease T2A                                                                                                                    | -1.44 |
| Phyhd1    | Phytanoyl-CoA dioxygenase domain containing 1                                                                                       | -1.44 |
| Col8a2    | Collagen, type VIII, alpha 2                                                                                                        | -1.45 |
| Rgs22     | Regulator of G-protein signalling 22                                                                                                | -1.45 |
| Nt5dc2    | 5'-nucleotidase domain containing 2                                                                                                 | -1.45 |
|           | 10 day old male pancreas cDNA, RIKEN full-length enriched library,<br>clone:1810063E24 product:unclassifiable, full insert sequence | -1.46 |
| Gpr3      | G-protein coupled receptor 3                                                                                                        | -1.46 |
| Mxra7     | Matrix-remodelling associated 7                                                                                                     | -1.46 |
| Fstl1     | Follistatin-like 1                                                                                                                  | -1.46 |
| Mettl7a   | Methyltransferase like 7A                                                                                                           | -1.46 |
| Sh3px3    | SH3 and PX domain containing 3                                                                                                      | -1.47 |
| Fblim1    | Filamin binding LIM protein 1                                                                                                       | -1.47 |

|          |                                                              |       |
|----------|--------------------------------------------------------------|-------|
| Rora     | RAR-related orphan receptor alpha                            | -1.48 |
| Clmn     | Calmin                                                       | -1.48 |
| Senp8    | SUMO/sentrin specific peptidase 8                            | -1.48 |
| Gpr126   | G protein-coupled receptor 126                               | -1.49 |
| BC057022 | CDNA sequence BC057022                                       | -1.49 |
| Kcnip1   | Kv channel-interacting protein 1                             | -1.49 |
| Dnahc5   | Dynein, axonemal, heavy chain 5                              | -1.49 |
| Evi1     | Ecotropic viral integration site 1                           | -1.49 |
| Ihpk3    | Inositol hexaphosphate kinase 3                              | -1.49 |
| Zfp72    | Zinc finger protein 72                                       | -1.49 |
| Vamp1    | Vesicle-associated membrane protein 1                        | -1.49 |
| Gal      | Galanin                                                      | -1.50 |
| Fmo5     | Flavin containing monooxygenase 5                            | -1.50 |
| Phlda3   | Pleckstrin homology-like domain, family A, member 3          | -1.50 |
| Lrrc18   | Leucine rich repeat containing 18                            | -1.50 |
| Ccdc33   | Coiled-coil domain containing 33                             | -1.50 |
| Kif9     | Kinesin family member 9                                      | -1.50 |
| Rom1     | Rod outer segment membrane protein 1                         | -1.51 |
| Zfp568   | Zinc finger protein 568                                      | -1.51 |
| Cd160    | CD160 antigen                                                | -1.51 |
| Zfp354b  | Zinc finger protein 354B                                     | -1.51 |
| Epha8    | Eph receptor A8                                              | -1.52 |
| Zfp105   | Zinc finger protein 105                                      | -1.52 |
| Rarres1  | Retinoic acid receptor responder (tazarotene induced) 1      | -1.52 |
| Rhpn2    | Rhopilin, Rho GTPase binding protein 2                       | -1.53 |
| Vdr      | Vitamin D receptor                                           | -1.53 |
| Calr3    | Calreticulin 3                                               | -1.53 |
| Serpib1a | Serine (or cysteine) peptidase inhibitor, clade B, member 1a | -1.53 |
| Egflam   | EGF-like, fibronectin type III and laminin G domains         | -1.53 |
| Kctd11   | Potassium channel tetramerisation domain containing 11       | -1.53 |

|            |                                                                                                               |       |
|------------|---------------------------------------------------------------------------------------------------------------|-------|
| Card10     | Caspase recruitment domain family, member 10                                                                  | -1.53 |
| BC043476   | CDNA sequence BC043476                                                                                        | -1.53 |
| Smyd1      | SET and MYND domain containing 1                                                                              | -1.53 |
| Ttc12      | Tetratricopeptide repeat domain 12                                                                            | -1.53 |
| Zfp618     | Zinc fingerprotein 618                                                                                        | -1.54 |
| Zfp768     | Zinc finger protein 768                                                                                       | -1.54 |
| Trim47     | Tripartite motif protein 47                                                                                   | -1.54 |
| Kctd9      | Potassium channel tetramerisation domain containing 9                                                         | -1.55 |
| Slc6a7     | Solute carrier family 6 (neurotransmitter transporter, L-proline), member<br>7                                | -1.55 |
| Psg16      | Pregnancy specific glycoprotein 16                                                                            | -1.55 |
| Ccdc60     | Coiled-coil domain containing 60                                                                              | -1.56 |
| Snx8       | Sorting nexin 8                                                                                               | -1.56 |
| Nuak2      | NUAK family, SNF1-like kinase, 2                                                                              | -1.56 |
| Alox8      | Arachidonate 8-lipoxygenase                                                                                   | -1.56 |
| Tmlhe      | Trimethyllysine hydroxylase, epsilon                                                                          | -1.57 |
| Gdpd2      | Glycerophosphodiester phosphodiesterase domain containing 2                                                   | -1.57 |
| Ebi2       | Epstein-Barr virus induced gene 2                                                                             | -1.57 |
| Tmem132e   | Transmembrane protein 132E                                                                                    | -1.58 |
| Muc15      | Mucin 15                                                                                                      | -1.58 |
| Tpmt       | Thiopurine methyltransferase<br>ST6                                                                           | -1.58 |
| St6galnac3 | (alpha-N-acetyl-neuraminyl-2,3-beta-galactosyl-1,3)-N-acetylgalactosami<br>nide alpha-2,6-sialyltransferase 3 | -1.58 |
| Gstt2      | Glutathione S-transferase, theta 2                                                                            | -1.59 |
| Ush1g      | Usher syndrome 1G homolog (human)                                                                             | -1.59 |
| Ptpn4      | Protein tyrosine phosphatase, non-receptor type 4                                                             | -1.60 |
| Cd109      | CD109 antigen                                                                                                 | -1.60 |
| Ccdc96     | Coiled-coil domain containing 96                                                                              | -1.60 |
| Kcnk12     | Potassium channel, subfamily K, member 12                                                                     | -1.60 |

|          |                                                                                                |       |
|----------|------------------------------------------------------------------------------------------------|-------|
| Btbd16   | BTB (POZ) domain containing 16                                                                 | -1.60 |
| Adamts20 | A disintegrin-like and metallopeptidase (reprolysin type) with thrombospondin type 1 motif, 20 | -1.61 |
| Nhlh2    | Nescient helix loop helix 2                                                                    | -1.61 |
| Heph     | Hephaestin                                                                                     | -1.61 |
| Fbxo30   | F-box protein 30                                                                               | -1.62 |
| Adrb3    | Adrenergic receptor, beta 3                                                                    | -1.62 |
| Npal2    | NIPA-like domain containing 2                                                                  | -1.62 |
| Parp3    | Poly (ADP-ribose) polymerase family, member 3                                                  | -1.62 |
| FlnC     | Filamin C, gamma (actin binding protein 280)                                                   | -1.62 |
| Asc11    | Achaete-scute complex homolog-like 1 (Drosophila)                                              | -1.62 |
| Lrrc23   | Leucine rich repeat containing 23                                                              | -1.62 |
| Slc41a3  | Solute carrier family 41, member 3                                                             | -1.62 |
| Terf1    | Telomeric repeat binding factor 1                                                              | -1.63 |
| Tdrd6    | Tudor domain containing 6                                                                      | -1.63 |
| Glipr2   | GLI pathogenesis-related 2                                                                     | -1.63 |
| Wdr63    | WD repeat domain 63                                                                            | -1.63 |
| Gja7     | Gap junction membrane channel protein alpha 7                                                  | -1.63 |
| Asb16    | Ankyrin repeat and SOCS box-containing 16                                                      | -1.63 |
| Emilin2  | Elastin microfibril interfacier 2                                                              | -1.63 |
| Col9a3   | Collagen, type IX, alpha 3                                                                     | -1.64 |
| Klhl6    | Kelch-like 6 (Drosophila)                                                                      | -1.65 |
| Cachd1   | Cache domain containing 1                                                                      | -1.65 |
| Dnahc7a  | Dynein, axonemal, heavy chain 7A                                                               | -1.65 |
| BC026585 | CDNA sequence BC026585                                                                         | -1.65 |
| Zfp366   | Zinc finger protein 366                                                                        | -1.65 |
| Plch1    | Phospholipase C, eta 1                                                                         | -1.65 |
| Pctk3    | PCTAIRE-motif protein kinase 3                                                                 | -1.66 |
| Nudt21   | Nudix (nucleoside diphosphate linked moiety X)-type motif 21                                   | -1.66 |
| Ppp1r14a | Protein phosphatase 1, regulatory (inhibitor) subunit 14A                                      | -1.66 |

|          |                                                                                                |       |
|----------|------------------------------------------------------------------------------------------------|-------|
| Gss      | Glutathione synthetase                                                                         | -1.67 |
| Slc6a9   | Solute carrier family 6 (neurotransmitter transporter, glycine), member 9                      | -1.67 |
| S3-12    | Plasma membrane associated protein, S3-12                                                      | -1.67 |
| Adcy7    | Adenylate cyclase 7                                                                            | -1.67 |
| Prtn3    | Proteinase 3                                                                                   | -1.67 |
| Lrrtm1   | Leucine rich repeat transmembrane neuronal 1                                                   | -1.68 |
| Trim59   | Tripartite motif-containing 59                                                                 | -1.68 |
| Slc39a13 | Solute carrier family 39 (metal ion transporter), member 13                                    | -1.68 |
| Frmpd1   | FERM and PDZ domain containing 1                                                               | -1.68 |
| Arhgef5  | Rho guanine nucleotide exchange factor (GEF) 5                                                 | -1.68 |
| Zmat4    | Zinc finger, matrin type 4                                                                     | -1.69 |
| Zmynd10  | Zinc finger, MYND domain containing 10                                                         | -1.69 |
| Mtfr1    | Mitochondrial fission regulator 1                                                              | -1.70 |
| Cdkn1c   | Cyclin-dependent kinase inhibitor 1C (P57)                                                     | -1.70 |
|          | Transcribed locus, weakly similar to XP_001111709.1 similar to beta<br>globin [Macaca mulatta] | -1.70 |
| Neu3     | Neuraminidase 3                                                                                | -1.71 |
| Prr11    | Proline rich 11                                                                                | -1.71 |
| Slc14a1  | Solute carrier family 14 (urea transporter), member 1                                          | -1.71 |
| Slc27a2  | Solute carrier family 27 (fatty acid transporter), member 2                                    | -1.72 |
| Nat2     | N-acetyltransferase 2 (arylamine N-acetyltransferase)                                          | -1.72 |
| Icosl    | Icos ligand                                                                                    | -1.72 |
| Map3k14  | Mitogen-activated protein kinase kinase kinase 14                                              | -1.73 |
| Xkr8     | X Kell blood group precursor related family member 8 homolog                                   | -1.74 |
| Amotl2   | Angiomotin like 2                                                                              | -1.74 |
| Tnfaip8  | Tumor necrosis factor, alpha-induced protein 8                                                 | -1.74 |
| Mylip    | Myosin regulatory light chain interacting protein                                              | -1.74 |
| Syt9     | Synaptotagmin IX                                                                               | -1.74 |
| Tmem170  | Transmembrane protein 170                                                                      | -1.74 |
| Trh      | Thyrotropin releasing hormone                                                                  | -1.74 |

|          |                                                        |       |
|----------|--------------------------------------------------------|-------|
| Aldh1a1  | Aldehyde dehydrogenase family 1, subfamily A1          | -1.74 |
| Pthr1    | Parathyroid hormone receptor 1                         | -1.75 |
| Rttm     | Rotatin                                                | -1.75 |
| Dnaic2   | Dynein, axonemal, intermediate chain 2                 | -1.75 |
| Lbh      | Limb-bud and heart                                     | -1.75 |
| Cd24a    | CD24a antigen                                          | -1.75 |
| Aox4     | Aldehyde oxidase 4                                     | -1.76 |
| Dnahc9   | Dynein, axonemal, heavy chain 9                        | -1.76 |
| Ccdc102a | Coiled-coil domain containing 102A                     | -1.76 |
| Cbx8     | Chromobox homolog 8 (Drosophila Pc class)              | -1.77 |
| Cd38     | CD38 antigen                                           | -1.77 |
| Gstm7    | Glutathione S-transferase, mu 7                        | -1.77 |
| Cdc42ep2 | CDC42 effector protein (Rho GTPase binding) 2          | -1.77 |
| Tll2     | Tolloid-like 2                                         | -1.78 |
| Col14a1  | Collagen, type XIV, alpha 1                            | -1.78 |
| Hs3st3b1 | Heparan sulfate (glucosamine) 3-O-sulfotransferase 3B1 | -1.78 |
| Foxd1    | Forkhead box D1                                        | -1.79 |
|          | Transcribed locus, moderately similar to NP_067735.1   |       |
|          | A-kinase-anchoring-protein [Rattus norvegicus]         | -1.80 |
| Dnaic1   | Dynein, axonemal, intermediate chain 1                 | -1.80 |
| Tmhs     | Tetraspan transmembrane protein, hair cell stereocilia | -1.80 |
| Alas2    | Aminolevulinic acid synthase 2, erythroid              | -1.81 |
| Tbc1d2   | TBC1 domain family, member 2                           | -1.81 |
| Grin2d   | Glutamate receptor, ionotropic, NMDA2D (epsilon 4)     | -1.81 |
| Adcy8    | Adenylate cyclase 8                                    | -1.81 |
| Rshl3    | Radial spokehead-like 3                                | -1.81 |
| Tdrd5    | Tudor domain containing 5                              | -1.82 |
| Hs3st1   | Heparan sulfate (glucosamine) 3-O-sulfotransferase 1   | -1.82 |
| Lrriq1   | Leucine-rich repeats and IQ motif containing 1         | -1.82 |
| Iigp2    | Interferon inducible GTPase 2                          | -1.82 |

|          |                                                                                                  |       |
|----------|--------------------------------------------------------------------------------------------------|-------|
| Folh1    | Folate hydrolase                                                                                 | -1.83 |
| Dusp4    | Dual specificity phosphatase 4                                                                   | -1.83 |
| Six4     | Sine oculis-related homeobox 4 homolog (Drosophila)                                              | -1.83 |
| Itpkb    | Inositol 1,4,5-trisphosphate 3-kinase B                                                          | -1.84 |
| Slc4a5   | Solute carrier family 4, sodium bicarbonate cotransporter, member 5                              | -1.84 |
| Hist1h4h | Histone cluster 1, H4h                                                                           | -1.84 |
| Pkib     | Protein kinase inhibitor beta, cAMP dependent, testis specific                                   | -1.84 |
| Bmper    | BMP-binding endothelial regulator                                                                | -1.84 |
| Slc25a13 | Solute carrier family 25 (mitochondrial carrier, adenine nucleotide translocator), member 13     | -1.85 |
| Slc26a4  | Solute carrier family 26, member 4                                                               | -1.86 |
| Paqr6    | Progesterin and adipoQ receptor family member VI                                                 | -1.87 |
| Artn     | Artemin                                                                                          | -1.87 |
| Tcp11    | T-complex protein 11                                                                             | -1.88 |
| Cpt2     | Carnitine palmitoyltransferase 2                                                                 | -1.89 |
| Ly11     | Lymphoblastomic leukemia                                                                         | -1.89 |
| P4ha3    | Procollagen-proline, 2-oxoglutarate 4-dioxygenase (proline 4-hydroxylase), alpha polypeptide III | -1.89 |
| Rassf7   | Ras association (RalGDS/AF-6) domain family 7                                                    | -1.90 |
| Sp7      | Trans-acting transcription factor 7                                                              | -1.90 |
| BC060267 | CDNA sequence BC060267                                                                           | -1.90 |
| Fbn2     | Fibrillin 2                                                                                      | -1.90 |
| Amotl1   | Angiotensin-like 1                                                                               | -1.91 |
| Tec      | Cytoplasmic tyrosine kinase, Dscr28C related (Drosophila)                                        | -1.91 |
| Scara5   | Scavenger receptor class A, member 5 (putative)                                                  | -1.91 |
| Trim29   | Tripartite motif protein 29                                                                      | -1.91 |
| Il1a     | Interleukin 1 alpha                                                                              | -1.91 |
| Lrrc46   | Leucine rich repeat containing 46                                                                | -1.92 |
| Six3     | Sine oculis-related homeobox 3 homolog (Drosophila)                                              | -1.92 |

|           |                                                                       |       |
|-----------|-----------------------------------------------------------------------|-------|
| Gli1      | GLI-Kruppel family member GLI1                                        | -1.92 |
| Pgbd1     | PiggyBac transposable element derived 1                               | -1.92 |
| Stard6    | StAR-related lipid transfer (START) domain containing 6               | -1.93 |
| Ccdc89    | Coiled-coil domain containing 89                                      | -1.94 |
| Rassf4    | Ras association (RalGDS/AF-6) domain family 4                         | -1.94 |
| Rnf152    | Ring finger protein 152                                               | -1.94 |
| Trim67    | Tripartite motif-containing 67                                        | -1.94 |
| Aldh3b2   | Aldehyde dehydrogenase 3 family, member B2                            | -1.94 |
| Tmprss5   | Transmembrane protease, serine 5 (spinesin)                           | -1.94 |
| Atp7b     | ATPase, Cu <sup>++</sup> transporting, beta polypeptide               | -1.95 |
| Hdc       | Histidine decarboxylase                                               | -1.95 |
| Lrrc38    | Leucine rich repeat containing 38                                     | -1.95 |
| Calb2     | Calbindin 2                                                           | -1.95 |
| Myom1     | Myomesin 1                                                            | -1.95 |
| Nefh      | Neurofilament, heavy polypeptide                                      | -1.96 |
| Myct1     | Myc target 1                                                          | -1.97 |
| Plcg2     | Phospholipase C, gamma 2                                              | -1.98 |
| Erv3      | Endogenous retroviral sequence 3                                      | -1.99 |
| Slc39a4   | Solute carrier family 39 (zinc transporter), member 4                 | -1.99 |
| Ankrd57   | Ankyrin repeat domain 57                                              | -1.99 |
| Marveld2  | MARVEL (membrane-associating) domain containing 2                     | -1.99 |
| Kcnh2     | Potassium voltage-gated channel, subfamily H (eag-related), member 2  | -1.99 |
| Rorc      | RAR-related orphan receptor gamma                                     | -1.99 |
| Rab11fip1 | RAB11 family interacting protein 1 (class I)                          | -2.00 |
| Trim36    | Tripartite motif-containing 36                                        | -2.02 |
| Rsph1     | Radial spoke head 1 homolog (Chlamydomonas)                           | -2.03 |
| Trim34    | Tripartite motif protein 34                                           | -2.04 |
| Grp       | Gastrin releasing peptide                                             | -2.04 |
| Ptpn3     | Protein tyrosine phosphatase, non-receptor type 3                     | -2.05 |
| Slc16a5   | Solute carrier family 16 (monocarboxylic acid transporters), member 5 | -2.05 |



|          |                                                                         |       |
|----------|-------------------------------------------------------------------------|-------|
| Kcnc2    | Potassium voltage gated channel, Shaw-related subfamily, member 2       | -2.05 |
| Gm216    | Gene model 216, (NCBI)                                                  | -2.06 |
| Irx2     | Iroquois related homeobox 2 (Drosophila)                                | -2.06 |
| Chrna4   | Cholinergic receptor, nicotinic, alpha polypeptide 4                    | -2.07 |
| Vav3     | Vav 3 oncogene                                                          | -2.07 |
| Ptgfr    | Prostaglandin F receptor                                                | -2.07 |
| Pdgfd    | Platelet-derived growth factor, D polypeptide                           | -2.08 |
| Lincr    | Lung-inducible neuralized-related C3HC4 RING domain protein             | -2.08 |
| Slc6a11  | Solute carrier family 6 (neurotransmitter transporter, GABA), member 11 | -2.08 |
| Lrig3    | Leucine-rich repeats and immunoglobulin-like domains 3                  | -2.08 |
| Meox1    | Mesenchyme homeobox 1                                                   | -2.09 |
| Nrip3    | Nuclear receptor interacting protein 3                                  | -2.09 |
| Dnahc7l  | Dynein, axonemal, heavy chain 7-like                                    | -2.09 |
| Slc45a3  | Solute carrier family 45, member 3                                      | -2.10 |
| Rasd1    | RAS, dexamethasone-induced 1                                            | -2.10 |
| Tekt1    | Tektin 1                                                                | -2.10 |
| Serpinf1 | Serine (or cysteine) peptidase inhibitor, clade F, member 1             | -2.10 |
| Inhbb    | Inhibin beta-B                                                          | -2.10 |
| Lpo      | Lactoperoxidase                                                         | -2.11 |
| Hes5     | Hairy and enhancer of split 5 (Drosophila)                              | -2.11 |
| Flt3     | FMS-like tyrosine kinase 3                                              | -2.11 |
| Col25a1  | Collagen, type XXV, alpha 1                                             | -2.11 |
| Dhx58    | DEXH (Asp-Glu-X-His) box polypeptide 58                                 | -2.13 |
| Dsp      | Desmoplakin                                                             | -2.13 |
| Foxj1    | Forkhead box J1                                                         | -2.14 |
| Cd48     | CD48 antigen                                                            | -2.14 |
| Fgd5     | FYVE, RhoGEF and PH domain containing 5                                 | -2.16 |
| BC064033 | CDNA sequence BC064033                                                  | -2.17 |
| Cacna2d4 | Calcium channel, voltage-dependent, alpha 2/delta subunit 4             | -2.18 |
| Galnt12  | UDP-N-acetyl-alpha-D-galactosamine:polypeptide                          | -2.18 |

|          |                                                                       |       |
|----------|-----------------------------------------------------------------------|-------|
|          | N-acetylgalactosaminyltransferase 12                                  |       |
| Btbd11   | BTB (POZ) domain containing 11                                        | -2.18 |
| Lif      | Leukemia inhibitory factor                                            | -2.18 |
| Gfap     | Glial fibrillary acidic protein                                       | -2.19 |
| Efhc1    | EF-hand domain (C-terminal) containing 1                              | -2.19 |
| Chrm2    | Cholinergic receptor, muscarinic 2, cardiac                           | -2.19 |
| Ptger3   | Prostaglandin E receptor 3 (subtype EP3)                              | -2.19 |
| Baiap211 | BAI1-associated protein 2-like 1                                      | -2.20 |
| Synpo2   | Synaptopodin 2                                                        | -2.20 |
| Zic3     | Zinc finger protein of the cerebellum 3                               | -2.20 |
| Spsb4    | SplA/ryanodine receptor domain and SOCS box containing 4              | -2.21 |
| Ccdc121  | Coiled-coil domain containing 121                                     | -2.21 |
| Slc2a4   | Solute carrier family 2 (facilitated glucose transporter), member 4   | -2.22 |
| Hs3st3a1 | Heparan sulfate (glucosamine) 3-O-sulfotransferase 3A1                | -2.23 |
| Ubx3     | UBX domain containing 3                                               | -2.25 |
| Plscr2   | Phospholipid scramblase 2                                             | -2.26 |
| Iigp1    | Interferon inducible GTPase 1                                         | -2.26 |
| Tmem16e  | Transmembrane protein 16E                                             | -2.27 |
| Casq1    | Calsequestrin 1                                                       | -2.27 |
| Zfp185   | Zinc finger protein 185                                               | -2.28 |
| Prrg4    | Proline rich Gla (G-carboxyglutamic acid) 4 (transmembrane)           | -2.28 |
| Stac     | Src homology three (SH3) and cysteine rich domain                     | -2.28 |
| Arsj     | Arylsulfatase J                                                       | -2.28 |
| Clic6    | Chloride intracellular channel 6                                      | -2.29 |
| Tanc1    | Tetratricopeptide repeat, ankyrin repeat and coiled-coil containing 1 | -2.29 |
| Lrrc36   | Leucine rich repeat containing 36                                     | -2.29 |
| Pln      | Phospholamban                                                         | -2.29 |
| Cdca7l   | Cell division cycle associated 7 like                                 | -2.29 |
| Tm7sf4   | Transmembrane 7 superfamily member 4                                  | -2.29 |
|          | Transcribed locus, weakly similar to XP_001083967.1 coronin, actin    | -2.30 |

|          |                                                                                                               |       |
|----------|---------------------------------------------------------------------------------------------------------------|-------|
|          | binding protein, 2B [Macaca mulatta]                                                                          |       |
| Mab2111  | Mab-21-like 1 (C. elegans)                                                                                    | -2.30 |
| Slc29a4  | Solute carrier family 29 (nucleoside transporters), member 4                                                  | -2.31 |
| Mrv1     | MRV integration site 1                                                                                        | -2.31 |
| Vwc2     | Von Willebrand factor C domain containing 2                                                                   | -2.32 |
| Wnt3     | Wingless-related MMTV integration site 3                                                                      | -2.33 |
| Aqp1     | Aquaporin 1                                                                                                   | -2.36 |
| Cecr2    | Cat eye syndrome chromosome region, candidate 2 homolog (human)                                               | -2.36 |
|          | Transcribed locus, strongly similar to XP_900926.1 hypothetical<br>protein LOC208213 isoform 2 [Mus musculus] | -2.38 |
| Rab20    | RAB20, member RAS oncogene family                                                                             | -2.39 |
| Fut4     | Fucosyltransferase 4                                                                                          | -2.39 |
| Ccdc40   | Coiled-coil domain containing 40                                                                              | -2.39 |
| Gm221    | Gene model 221, (NCBI)                                                                                        | -2.40 |
| Depdc1b  | DEP domain containing 1B                                                                                      | -2.41 |
| Ces3     | Carboxylesterase 3                                                                                            | -2.41 |
| Igsf1    | Immunoglobulin superfamily, member 1                                                                          | -2.41 |
|          | Transcribed locus, moderately similar to XP_001094404.1 similar to<br>alpha 2 globin [Macaca mulatta]         | -2.42 |
| F2r      | Coagulation factor II (thrombin) receptor                                                                     | -2.43 |
| Kcng4    | Potassium voltage-gated channel, subfamily G, member 4                                                        | -2.43 |
| A2m      | Alpha-2-macroglobulin                                                                                         | -2.44 |
| P2rx5    | Purinergic receptor P2X, ligand-gated ion channel, 5                                                          | -2.44 |
| Rgs16    | Regulator of G-protein signaling 16                                                                           | -2.45 |
| Zap70    | Zeta-chain (TCR) associated protein kinase                                                                    | -2.46 |
| Prrx11   | Paired related homeobox protein-like 1                                                                        | -2.46 |
| Gabbr2   | Gamma-aminobutyric acid (GABA-C) receptor, subunit rho 2                                                      | -2.47 |
| BC051019 | CDNA sequence BC051019                                                                                        | -2.47 |
| BC024139 | CDNA sequence BC024139                                                                                        | -2.48 |

|          |                                                                                                   |       |
|----------|---------------------------------------------------------------------------------------------------|-------|
| AU021034 | Expressed sequence AU021034                                                                       | -2.48 |
| Slc14a2  | Solute carrier family 14 (urea transporter), member 2                                             | -2.49 |
| St8sia6  | ST8 alpha-N-acetyl-neuraminide alpha-2,8-sialyltransferase 6                                      | -2.50 |
| Larp2    | La ribonucleoprotein domain family, member 2                                                      | -2.51 |
| Crb3     | Crumbs homolog 3 (Drosophila)                                                                     | -2.53 |
| Irx5     | Iroquois related homeobox 5 (Drosophila)                                                          | -2.55 |
| Adra2b   | Adrenergic receptor, alpha 2b                                                                     | -2.56 |
| Capsl    | Calcyphosine-like                                                                                 | -2.56 |
| Zic2     | Zic finger protein of the cerebellum 2                                                            | -2.57 |
| Ltb4dh   | Leukotriene B4 12-hydroxydehydrogenase                                                            | -2.59 |
| F5       | Coagulation factor V                                                                              | -2.59 |
| Rab38    | Rab38, member of RAS oncogene family                                                              | -2.59 |
| Dnajb13  | DnaJ (Hsp40) related, subfamily B, member 13                                                      | -2.60 |
| Styx11   | Serine/threonine/tyrosine interacting-like 1                                                      | -2.61 |
| Gpr35    | G protein-coupled receptor 35                                                                     | -2.62 |
| Tmem26   | Transmembrane protein 26                                                                          | -2.62 |
| Spata17  | Spermatogenesis associated 17                                                                     | -2.64 |
| Tacstd2  | Tumor-associated calcium signal transducer 2                                                      | -2.65 |
| Esrrb    | Estrogen related receptor, beta                                                                   | -2.65 |
| Abca4    | ATP-binding cassette, sub-family A (ABC1), member 4                                               | -2.67 |
| Asf1b    | ASF1 anti-silencing function 1 homolog B (S. cerevisiae)                                          | -2.67 |
| Ccdc67   | Coiled-coil domain containing 67                                                                  | -2.67 |
| Bbox1    | Butyrobetaine (gamma), 2-oxoglutarate dioxygenase 1<br>(gamma-butyrobetaine hydroxylase)          | -2.67 |
| Adamts15 | A disintegrin-like and metallopeptidase (reprolysin type) with<br>thrombospondin type 1 motif, 15 | -2.67 |
| Dusp27   | Dual specificity phosphatase 27 (putative)                                                        | -2.68 |
| Folr1    | Folate receptor 1 (adult)                                                                         | -2.68 |
| Lbp      | Lipopolysaccharide binding protein                                                                | -2.68 |
| Spag8    | Sperm associated antigen 8                                                                        | -2.69 |

|              |                                                               |       |
|--------------|---------------------------------------------------------------|-------|
| Pklr         | Pyruvate kinase liver and red blood cell                      | -2.70 |
| Tmem27       | Transmembrane protein 27                                      | -2.71 |
| Hrc          | Histidine rich calcium binding protein                        | -2.74 |
| T2           | Brachyury 2                                                   | -2.74 |
| Pomc         | Pro-opiomelanocortin-alpha                                    | -2.74 |
| Alpk2        | Alpha-kinase 2                                                | -2.74 |
| Dennd2d      | DENN/MADD domain containing 2D                                | -2.75 |
| Prox1        | Prospero-related homeobox 1                                   | -2.75 |
| Dnahc11      | Dynein, axonemal, heavy chain 11                              | -2.77 |
| Spef2        | Sperm flagellar 2                                             | -2.78 |
| Cxcr4        | Chemokine (C-X-C motif) receptor 4                            | -2.81 |
| Nr2f2        | Nuclear receptor subfamily 2, group F, member 2               | -2.83 |
| Cckar        | Cholecystokinin A receptor                                    | -2.84 |
| Nek5         | NIMA (never in mitosis gene a)-related expressed kinase 5     | -2.85 |
| Hydin        | Hydrocephalus inducing                                        | -2.85 |
| Akr1c13      | Aldo-keto reductase family 1, member C13                      | -2.86 |
| Npsr1        | Neuropeptide S receptor 1                                     | -2.86 |
| Sh3d19       | SH3 domain protein D19                                        | -2.87 |
| Got1l1       | Glutamic-oxaloacetic transaminase 1-like 1                    | -2.89 |
| Rgs9bp       | Regulator of G-protein signalling 9 binding protein           | -2.90 |
| Ttc18        | Tetratricopeptide repeat domain 18                            | -2.90 |
| Olfir658     | Olfactory receptor 658                                        | -2.92 |
| Wdr69        | WD repeat domain 69                                           | -2.95 |
| Ak7          | Adenylate kinase 7                                            | -2.96 |
| Lancl3       | LanC lantibiotic synthetase component C-like 3 (bacterial)    | -2.96 |
| Aqp6         | Aquaporin 6                                                   | -2.97 |
| Marveld3     | MARVEL (membrane-associating) domain containing 3             | -2.99 |
| Elf4         | E74-like factor 4 (ets domain transcription factor)           | -2.99 |
| Nmur2        | Neuromedin U receptor 2                                       | -2.99 |
| LOC100040591 | Potassium inwardly-rectifying channel, subfamily J, member 13 | -3.01 |

|              |                                                                                       |       |
|--------------|---------------------------------------------------------------------------------------|-------|
| Rec8         | REC8 homolog (yeast)                                                                  | -3.04 |
| Rbp3         | Retinol binding protein 3, interstitial                                               | -3.04 |
| Trpm8        | Transient receptor potential cation channel, subfamily M, member 8                    | -3.05 |
| Grid2ip      | Glutamate receptor, ionotropic, delta 2 (Grid2) interacting protein 1                 | -3.05 |
| Prom2        | Prominin 2                                                                            | -3.06 |
| Trp63        | Transformation related protein 63                                                     | -3.07 |
| Srxp2        | Sushi-repeat-containing protein, X-linked 2                                           | -3.08 |
| Wdr72        | WD repeat domain 72                                                                   | -3.09 |
| Ptpn20       | Protein tyrosine phosphatase, non-receptor type 20                                    | -3.09 |
| Spag16       | Sperm associated antigen 16                                                           | -3.10 |
| Klhdc8a      | Kelch domain containing 8A                                                            | -3.11 |
| Mlf1         | Myeloid leukemia factor 1                                                             | -3.11 |
| Cdh26        | Cadherin-like 26                                                                      | -3.12 |
| Msx1         | Homeo box, msh-like 1                                                                 | -3.14 |
| Serpinb6b    | Serine (or cysteine) peptidase inhibitor, clade B, member 6b                          | -3.14 |
| Gm1110       | Gene model 1110, (NCBI)                                                               | -3.15 |
| LOC100043490 | Similar to Ran-interacting protein MOG1                                               | -3.15 |
| Ube2u        | Ubiquitin-conjugating enzyme E2U (putative)                                           | -3.16 |
| Fgr          | Gardner-Rasheed feline sarcoma viral (Fgr) oncogene homolog                           | -3.16 |
| Cldn2        | Claudin 2                                                                             | -3.17 |
| Hoxa1        | Homeo box A1                                                                          | -3.17 |
| Lgals3       | Lectin, galactose binding, soluble 3                                                  | -3.19 |
| Mycn         | V-myc myelocytomatosis viral related oncogene, neuroblastoma derived<br>(avian)       | -3.19 |
| Acaa1b       | Acetyl-Coenzyme A acyltransferase 1B                                                  | -3.19 |
|              | Transcribed locus, weakly similar to NP_055333.2 finger protein 229<br>[Homo sapiens] | -3.20 |
| Ccdc135      | Coiled-coil domain containing 135                                                     | -3.21 |
| Irx1         | Iroquois related homeobox 1 (Drosophila)                                              | -3.22 |

|           |                                                                                                                             |       |
|-----------|-----------------------------------------------------------------------------------------------------------------------------|-------|
| Ttc21a    | Tetratricopeptide repeat domain 21A                                                                                         | -3.24 |
| Crygn     | Crystallin, gamma N                                                                                                         | -3.24 |
| Abca13    | ATP-binding cassette, sub-family A (ABC1), member 13                                                                        | -3.24 |
| Zic1      | Zinc finger protein of the cerebellum 1                                                                                     | -3.24 |
| Plek2     | Pleckstrin 2                                                                                                                | -3.27 |
| Tcf23     | Transcription factor 23                                                                                                     | -3.29 |
| Ramp3     | Receptor (calcitonin) activity modifying protein 3                                                                          | -3.30 |
| Nmur1     | Neuromedin U receptor 1                                                                                                     | -3.31 |
| Lrrc43    | Leucine rich repeat containing 43                                                                                           | -3.31 |
| Bcl2l15   | Bcl2-like 15                                                                                                                | -3.31 |
| Serpnb7   | Serine (or cysteine) peptidase inhibitor, clade B, member 7                                                                 | -3.31 |
| Serpina3c | Serine (or cysteine) peptidase inhibitor, clade A, member 3C                                                                | -3.31 |
| Cd19      | CD19 antigen                                                                                                                | -3.31 |
| BC048644  | CDNA sequence BC048644                                                                                                      | -3.32 |
| Actn3     | Actinin alpha 3                                                                                                             | -3.35 |
|           | CDNA, clone:Y1G0108I18, strand:plus,<br>reference:ENSEMBL:Mouse-Transcript-ENST:ENSMUST00000058914,<br>based on BLAT search | -3.35 |
| Kcnk15    | Potassium channel, subfamily K, member 15                                                                                   | -3.37 |
| Il7r      | Interleukin 7 receptor                                                                                                      | -3.38 |
| Wnt9b     | Wingless-type MMTV integration site 9B                                                                                      | -3.39 |
| Agt       | Angiotensinogen (serpin peptidase inhibitor, clade A, member 8)                                                             | -3.40 |
| Kcnmb2    | Potassium large conductance calcium-activated channel, subfamily M,<br>beta member 2                                        | -3.42 |
| Lingo4    | Leucine rich repeat and Ig domain containing 4                                                                              | -3.43 |
| Epx       | Eosinophil peroxidase                                                                                                       | -3.44 |
| Klrg1     | Killer cell lectin-like receptor subfamily G, member 1                                                                      | -3.45 |
| Slco1a5   | Solute carrier organic anion transporter family, member 1a5                                                                 | -3.45 |
| Lhb       | Luteinizing hormone beta                                                                                                    | -3.48 |

|          |                                                                    |       |
|----------|--------------------------------------------------------------------|-------|
| Bdkrb1   | Bradykinin receptor, beta 1                                        | -3.49 |
| Scube2   | Signal peptide, CUB domain, EGF-like 2                             | -3.50 |
| Trpm6    | Transient receptor potential cation channel, subfamily M, member 6 | -3.51 |
| Gpr179   | G protein-coupled receptor 179                                     | -3.52 |
| Depdc7   | DEP domain containing 7                                            | -3.54 |
| Fcna     | Ficolin A                                                          | -3.54 |
| Spag17   | Sperm associated antigen 17                                        | -3.56 |
| Ripk4    | Receptor-interacting serine-threonine kinase 4                     | -3.56 |
| Trim40   | Tripartite motif-containing 40                                     | -3.57 |
| Stoml3   | Stomatin (Epb7.2)-like 3                                           | -3.58 |
| Ntng1    | Netrin G1                                                          | -3.58 |
| Klhl31   | Kelch-like 31 (Drosophila)                                         | -3.58 |
| Itgad    | Integrin, alpha D                                                  | -3.58 |
| AU015836 | Expressed sequence AU015836                                        | -3.58 |
| Sall4    | Sal-like 4 (Drosophila)                                            | -3.58 |
| Zfp541   | Zinc finger protein 541                                            | -3.60 |
| Tmem156  | Transmembrane protein 156                                          | -3.61 |
| Nkx2-9   | NK2 transcription factor related, locus 9 (Drosophila)             | -3.61 |
| Ngfr     | Nerve growth factor receptor (TNFR superfamily, member 16)         | -3.66 |
| Ccdc69   | Coiled-coil domain containing 69                                   | -3.69 |
| Nms      | Neuromedin S                                                       | -3.70 |
| Tmem45b  | Transmembrane protein 45b                                          | -3.72 |
| Fign     | Fidgetin                                                           | -3.73 |
| Spata18  | Spermatogenesis associated 18                                      | -3.75 |
| Sh2d4b   | SH2 domain containing 4B                                           | -3.77 |
| Creb3l3  | CAMP responsive element binding protein 3-like 3                   | -3.77 |
| Il22ra1  | Interleukin 22 receptor, alpha 1                                   | -3.80 |
| Has2     | Hyaluronan synthase 2                                              | -3.80 |
| Kcnk7    | Potassium channel, subfamily K, member 7                           | -3.80 |
| Ccdc110  | Coiled-coil domain containing 110                                  | -3.80 |



|          |                                                                                                         |       |
|----------|---------------------------------------------------------------------------------------------------------|-------|
| Gm941    | Gene model 941, (NCBI)                                                                                  | -3.81 |
| Mctp2    | Multiple C2 domains, transmembrane 2                                                                    | -3.85 |
| Anxa8    | Annexin A8                                                                                              | -3.86 |
| Gm693    | Gene model 693, (NCBI)                                                                                  | -3.87 |
| Sptlc3   | Serine palmitoyltransferase, long chain base subunit 3                                                  | -3.90 |
| Tmprss2  | Transmembrane protease, serine 2                                                                        | -3.90 |
| Dsg1a    | Desmoglein 1 alpha                                                                                      | -3.92 |
| Klhl14   | Kelch-like 14 (Drosophila)                                                                              | -3.92 |
| Gtf2a11  | General transcription factor IIA, 1-like                                                                | -3.93 |
| Notum    | Notum pectinacylesterase homolog (Drosophila)                                                           | -3.96 |
| Gimap9   | GTPase, IMAP family member 9                                                                            | -3.99 |
| Gpr111   | G protein-coupled receptor 111                                                                          | -3.99 |
| Cldn19   | Claudin 19                                                                                              | -4.00 |
| Adamts14 | A disintegrin-like and metallopeptidase (reprolysin type) with thrombospondin type 1 motif, 14          | -4.01 |
| Gpr174   | G protein-coupled receptor 174                                                                          | -4.03 |
| Kcne2    | Potassium voltage-gated channel, Isk-related subfamily, gene 2                                          | -4.03 |
| Uts2r    | Urotensin 2 receptor                                                                                    | -4.05 |
| Irx3     | Iroquois related homeobox 3 (Drosophila)                                                                | -4.07 |
| Pp11r    | Placental protein 11 related                                                                            | -4.16 |
| Ccdc11   | Coiled-coil domain containing 11                                                                        | -4.16 |
| Zfp750   | Zinc finger protein 750                                                                                 | -4.17 |
| Krt18    | Keratin 18                                                                                              | -4.17 |
| Slc17a6  | Solute carrier family 17 (sodium-dependent inorganic phosphate cotransporter), member 6                 | -4.18 |
| Frem3    | Fras1 related extracellular matrix protein 3                                                            | -4.20 |
| Opn4     | Opsin 4 (melanopsin)                                                                                    | -4.23 |
|          | Transcribed locus, moderately similar to XP_001093456.1 similar to slit and trk like 6 [Macaca mulatta] | -4.24 |

|         |                                                                                             |       |
|---------|---------------------------------------------------------------------------------------------|-------|
| Padi1   | Peptidyl arginine deiminase, type I                                                         | -4.25 |
| Uncx4.1 | Unc4.1 homeobox ( <i>C. elegans</i> )                                                       | -4.25 |
| Nrtn    | Neurturin                                                                                   | -4.27 |
| C1ql2   | Complement component 1, q subcomponent-like 2                                               | -4.30 |
| Bhmt2   | Betaine-homocysteine methyltransferase 2                                                    | -4.32 |
| Slc43a3 | Solute carrier family 43, member 3                                                          | -4.32 |
| Clec12b | C-type lectin domain family 12, member B                                                    | -4.34 |
| Snai2   | Snail homolog 2 ( <i>Drosophila</i> )                                                       | -4.38 |
| Ret     | Ret proto-oncogene                                                                          | -4.38 |
| Gdf2    | Growth differentiation factor 2                                                             | -4.40 |
| Neurog2 | Neurogenin 2                                                                                | -4.40 |
| Tgtp    | T-cell specific GTPase                                                                      | -4.43 |
| Fbxo40  | F-box protein 40                                                                            | -4.48 |
| Zfp474  | Zinc finger protein 474                                                                     | -4.52 |
| Mogat1  | Monoacylglycerol O-acyltransferase 1                                                        | -4.58 |
| Dmrt3   | Doublesex and mab-3 related transcription factor 3                                          | -4.58 |
| Glr1    | Glycine receptor, alpha 1 subunit                                                           | -4.59 |
| Magix   | MAGI family member, X-linked                                                                | -4.60 |
| Tcf7l2  | Transcription factor 7-like 2, T-cell specific, HMG-box                                     | -4.64 |
| Colq    | Collagen-like tail subunit (single strand of homotrimer) of asymmetric acetylcholinesterase | -4.76 |
| Lrrc34  | Leucine rich repeat containing 34                                                           | -4.81 |
| Nr0b2   | Nuclear receptor subfamily 0, group B, member 2                                             | -4.85 |
| Pappa   | Pregnancy-associated plasma protein A                                                       | -5.00 |
| Foxb1   | Forkhead box B1                                                                             | -5.10 |
| Calca   | Calcitonin/calcitonin-related polypeptide, alpha                                            | -5.30 |
| Ldlrad2 | Low density lipoprotein receptor A domain containing 2                                      | -5.36 |
| Sh3bgr  | SH3-binding domain glutamic acid-rich protein                                               | -5.52 |
| Otop1   | Otopetrin 1                                                                                 | -5.66 |

|       |                                            |       |
|-------|--------------------------------------------|-------|
| Gnb3  | Guanine nucleotide binding protein, beta 3 | -5.68 |
| Lmx1a | LIM homeobox transcription factor 1 alpha  | -5.89 |
| Lmod2 | Leiomodin 2 (cardiac)                      | -6.09 |
| Lhx9  | LIM homeobox protein 9                     | -7.40 |

---

(\*: Log<sub>2</sub> ratio means up-regulation. The log<sub>2</sub> ratio < 0 means down-regulated).
